1 **The model of local axon homeostasis - explaining the role and regulation of microtubule**  
2 **bundles in axon maintenance and pathology**

3  
4 Ines Hahn, André Voelzmann, Yu-Ting Liew, Beatriz Costa-Gomes, Andreas Prokop<sup>#</sup>

5  
6  
7  
8 The University of Manchester, Manchester Academic Health Science Centre, Faculty of Biology,  
9 Medicine and Health, School of Biology, Manchester, UK

10  
11 Running title: The role of microtubules in axon pathology

12 Key words: *Drosophila*, neurodegeneration, axons, actin, cytoskeleton, microtubules

13  
14 <sup>#</sup> author for correspondence: Andreas Prokop  
15 Tel: +44-(0)161-27-51556  
16 Andreas.Prokop@manchester.ac.uk

17  
18  
19 **Abstract**

20 Axons are the slender, cable-like, up to meter-long projections of neurons that electrically wire  
21 our brain and body. In spite of their challenging morphology, they usually need to be maintained  
22 for an organism's lifetime. This makes them key lesion sites in pathological processes of ageing,  
23 injury and neurodegeneration. The morphology and physiology of axons crucially depends on  
24 the parallel bundles of microtubules (MTs), running all along to form their structural backbones  
25 and highways for life-sustaining cargo transport and organelle dynamics. Understanding how  
26 these bundles are formed and then maintained will provide important explanations for axon  
27 biology and pathology. Currently, much is known about MTs and the proteins that bind and  
28 regulate them, but very little about how they functionally integrate to regulate axons. As an  
29 attempt to bridge this important knowledge gap, we explain here the model of local axon  
30 homeostasis, based on our own experiments and published data. (1) As the default, we observe  
31 that axonal MTs have a strong bias to become disorganised, likely caused by the physical  
32 forces imposed by motor proteins and their life-sustaining functions during intra-axonal transport  
33 and dynamics. (2) Preventing MT disorganisation and promoting their bundled conformation,  
34 requires complex machinery involving most or even all major classes of MT-binding and -  
35 regulating proteins. As will be discussed, this model offers new explanations for axonopathies,  
36 in particular those linking to MT-regulating proteins and motors; it will hopefully motivate more  
37 researchers to study MTs, and help to decipher the complex regulatory networks that can  
38 explain axon biology and pathology.

## 39 Introduction

40 Axons are the slender, cable-like extensions of nerve cells which form the nerves and nerve  
41 tracts that wire our brain and body, sending neuronal messages in highly regulated manners.  
42 With diameters of only 0.1-15 $\mu$ m (Hoffman, 1995), they extend over distances of up to a meter  
43 in humans. To adopt such a unique morphology and physiology, axons display many  
44 specialised features (Fig.1).

45 Axons are indispensable for nervous system function, as illustrated by paralysis in spinal cord  
46 injury caused by the interruption of ascending and descending axon tracts (Bichenback, 2013;  
47 Tedeschi and Bradke, 2016). Axons are key lesion sites in injury-induced trauma and coma  
48 (Gaetz, 2004; Medana and Esiri, 2003; Smith et al., 2000; Tang-Schomer et al., 2012), and  
49 axon decay is believed to be an important trigger for neuronal loss in ageing and many  
50 neurodegenerative disorders (Adalbert and Coleman, 2012; Salvadores et al., 2017). Notably,  
51 most neurons cannot be replaced, and compensation of lost axons through collateral branching  
52 of intact neighbouring axons has obvious limitations (Adalbert and Coleman, 2012; Sturrock,  
53 1987).

54 This means that most axons have to be maintained for an organism's life time, i.e. up to a  
55 century in humans; unsurprisingly, mammals tend to lose almost half their axon mass towards  
56 high age (Calkins, 2013; Marner et al., 2003). This trend is severely enhanced in  
57 neurodegenerative disorders, as illustrated by gradually increasing paralysis in spastic  
58 paraplegia or motorneuron disease (Blackstone et al., 2011; Riancho et al., 2019).

59 Research into neurodegenerative disorders typically approaches the problem by describing  
60 observed phenotypes and unravelling the molecular mechanisms performed by proteins linked  
61 to the disease. However, this approach rarely leads to satisfactory explanations of the pathology  
62 (Aguzzi, 2019). We believe that more profound understanding will arise when widening the  
63 scope from molecular to cellular mechanisms, by studying how proteins work within regulatory  
64 networks to underpin observable processes of axon biology - thus performing investigations at  
65 the same level of complexity at which pathology becomes manifest. Here we will illustrate this  
66 approach by focussing on the axonal cytoskeleton.

67

## 68 The importance of microtubule bundles for axon biology

69 As illustrated in Fig. 1, the cytoskeleton of the axon shaft consists of straight parallel bundles of  
70 MTs, which are interspersed with intermediate filaments (not shown) and longitudinal actin  
71 fibres called 'actin trails' - all running through evenly spaced periodic rings, proposed to consist  
72 either of short and adducin-capped actin filaments (Qu et al., 2017; Xu et al., 2013) or of two  
73 long intertwined actin filaments (Vassilopoulos et al., 2019) - future will show. Significant  
74 deviations from this organisation that will not be considered in this review, exist at axon initial  
75 segments (not shown in Fig.1), growth cones and synapses (Dent et al., 2011; Leterrier, 2018;  
76 Leterrier et al., 2017; Prokop, 2013).

77 Of the three cytoskeleton classes, intermediate filaments were suggested by anatomical,  
78 developmental and genetic studies to regulate axon diameter, and their axonal aggregation is a  
79 hallmark of many neurodegenerative diseases (Friede and Samorajski, 1970; Hoffman, 1995;  
80 Perrot et al., 2008; Rao et al., 2003; Sakaguchi et al., 1993). However, intermediate filament  
81 accumulations are not necessarily the cause, but can be the consequence of axon decay (Eyer  
82 et al., 1998; Nguyen et al., 2000; Perrot et al., 2008). Notably, *Neurofilament-H-lacZ* mutant  
83 mice or *Quiver* mutant quail completely lack axonal intermediate filaments, but develop and

84 breed fairly normally (Eyer and Peterson, 1994; Yamasaki et al., 1991). Furthermore, various  
85 arthropods form axons of defined diameters in the absence of any axonal intermediate filaments  
86 (Allen et al., 2006; Hirokawa, 1986; Voelzmann et al., 2016a). In contrast to the moderate roles  
87 of intermediate filaments, actin and microtubules (MT) are essential for all stages of neuronal  
88 development and maintenance (Sakakibara et al., 2013; Tas and Kapitein, 2018; Voelzmann et  
89 al., 2016a); this review will be dedicated to the role and regulation of MTs.

**Box 1** The roles of axonal MT bundles

(1) Axonal MT bundles serve as structural backbones, comparable to the vertebral column of a snake; since MTs in these bundles are discontinuous and expected to be interlinked via flexible connections (see section on cross-linkers), they are ideally suited to respond to longitudinal stretch and compression (similar to a half-extended telescope ladder), but also to torsion and flexure (Fig.2).

(2) Axonal MT bundles provide the highways for life-sustaining axonal transport between cell bodies and the axonal compartment. This transport is driven anterogradely by kinesins and retrogradely by the dynein/Dynactin complex; the cargoes include mRNAs, cytoplasmic proteins including signalling factors, vesicles delivering synaptic proteins, transmembrane proteins, neuropeptides and/or membrane lipids, as well as entire organelles including mitochondria (Fig. 3A-D; Goldstein et al., 2008; Gondre-Lewis et al., 2012; Gonzalez and Couve, 2014; Hirokawa et al., 2010; Pfenninger, 2009). Furthermore, local dynamics of organelles, such as fission or fusion of mitochondria, can be expected to require forces generated by MT-associated motor proteins (Fig. 3E; Saxton and Hollenbeck, 2012).

(3) Axonal MT bundles provide a source for readily available MTs that can be used for other purposes (curved arrows in Fig.1); for example, splaying MTs can trigger axon extension processes in growth cones (Dent et al., 2011; Prokop et al., 2013; Miller and Suter, 2018), induce branching through growth cone splitting (Acebes and Ferrus, 2000) or collateral branch formation along the axon shaft (Kalil and Dent, 2014; Tint et al., 2009; Tymanskyj et al., 2017), as well as support physiological changes at synapses (Bodaleo and Gonzalez-Billault, 2016).

90  
91 Axons contain bundles of MTs that run along the entire length of their shafts (Fig.1); these  
92 bundles are essential for axon biology in at least three ways: as structural backbones, as  
93 highways for axonal transport and organelle dynamics, and as source for splaying MTs that can  
94 contribute to axon morphogenesis or physiology (details in Box 1). Maintaining MT bundles is  
95 therefore crucial for axon longevity. Accordingly, there are prominent and numerous genetic  
96 links from MT regulators to hereditary neurodegenerative disorders (Suppl. Mat. in Prokop et al.,  
97 2013), and axon decay is a frequent side effect of MT-targeting chemotherapies (Prior et al.,  
98 2017; Wozniak et al., 2018; Wu et al., 2014). Of particular interest for this review are reports of  
99 pathological axon swellings where MT bundles have disintegrated into loops or waves (bottom  
100 of Fig.3), occurring in ageing, after injury and in certain axonopathies (Adalbert et al., 2009;  
101 Bernier and Kothary, 1998; Dalpe et al., 1998; Denton et al., 2014; Fassier et al., 2013; Havlicek  
102 et al., 2014; Sorbara et al., 2014; Tang-Schomer et al., 2012; Tarrade et al., 2006; Yamasaki et  
103 al., 1991; Yin et al., 2016). Notably, one study suggests that MT aberration upon ageing could  
104 cause swellings that trap and damage mitochondria, thus triggering axon degeneration (Fiala et  
105 al., 2007). However, in the existing literature too little emphasis is given to MTs and there are  
106 simply not enough data to deduce meaningful correlations between axon degeneration and MT  
107 bundle decay.

108 Even if there were a close correlation, this still does not exclude that, depending on the  
109 pathological condition, MT bundle deterioration may be a mere consequence rather than cause  
110 of axon decay (details in Fig.4). Ultimate clarification will only arise from developing a better  
111 understanding of MT bundle-forming and -maintaining machinery. Here we propose a  
112 conceptual framework that may facilitate such developments.

113

#### 114 From work in *Drosophila* to the integrated model of local axon homeostasis

115 The foundations for this conceptual framework were laid when we took the decision to use the  
116 fruit fly *Drosophila melanogaster* as a means to study how cytoskeletal regulators collaborate in  
117 orchestrating the morphogenetic changes that drive axon growth (Sánchez-Soriano et al.,  
118 2007). *Drosophila* is not a miniature human, but it has many advantages and provides powerful  
119 means to uncover the regulatory concepts behind the roles and regulations of axonal MTs,  
120 which then often apply to higher organisms (Box 2; Aguzzi, 2019; Bellen et al., 2010; Elden et  
121 al., 2010; Prokop, 2018). Through using *Drosophila* neurons as a consistent standardised cell  
122 system, our group alone performed functional analyses of over 50 actin- and/or MT-binding or -  
123 associating regulators (Prokop et al., 2013); these studies form an unprecedented pool of data  
124 on the basis of which to develop novel concepts (Alves-Silva et al., 2012; Beaven et al., 2015;  
125 Gonçalves-Pimentel et al., 2011; Qu et al., 2018; Qu et al., 2017; Voelzmann et al., 2016b).

#### **Box 2** Why use *Drosophila*?

The use of *Drosophila* neurons to study the neuronal cytoskeleton has a number of advantages that were detailed elsewhere (Prokop et al., 2013). Key aspects are the high degree of conservation of cytoskeletal proteins, regulators and dynamics, the experimental amenability of neurons in primary cell culture and *in vivo* (Prokop et al., 2013; Prokop et al., 2012; Sánchez-Soriano et al., 2010), and the relative ease of genetic manipulation based on available resources and efficient combinatorial genetics (Hahn et al., 2016). The power of combinatorial genetics is rooted in the relative ease, speed and cost effectiveness with which genes can be manipulated and functionally analysed, facilitating also combined analyses of multiple factors in the same animals or cells (Prokop, 2018; Prokop et al., 2013; Roote and Prokop, 2013). Combinatorial genetics has been extremely successful in overcoming problems of redundancy, and generating new conceptual understanding of co-operative networks of MT regulation (see main text). This can hardly be achieved through isolated work on individual factors.

126

127 Our loss-of-function analyses of 24 MT-binding or -associating (2<sup>nd</sup> order) proteins, revealed that  
128 more than half displayed significant MT disorganisation. Interestingly, the MT disorganisation  
129 found in these various conditions appears to display certain common characteristics: axons  
130 display areas in which their bundles are dissolved into chaotic, intertwined, crisscrossing  
131 arrangements of curled MTs (see examples in Fig.5). These phenotypes were surprising when  
132 considering that MTs usually behave like rigid rods (Fletcher and Mullins, 2010; Hawkins et al.,  
133 2010; Howard, 2001). Notably, when using some of the same genetic conditions *in vivo*,  
134 comparable phenotypes were observed in the fly brain (Qu et al., 2018). Such *in vivo*  
135 phenotypes in the fly remind of the curled MT conformations in pathological axon swellings of  
136 mammalian models mentioned in the previous section. Potential evolutionary conservation of  
137 this phenomenon is further supported by the occurrence of similar MT curling and  
138 disorganisation in mouse and rat primary neurons (Ahmad et al., 2006; Sánchez-Soriano et al.,  
139 2009) - and more reports will emerge once researchers consider MT disorganisation a

140 phenotype worth quantifying, not just an artefact.

141 As an attempt to explain the occurrence of this unusual phenotype across mutant conditions  
142 and animal groups, we developed the model of '*local axon homeostasis*' (Prokop, 2016;  
143 Voelzmann et al., 2016a), based on two fundamental elements:

144 (1) The model proposes that MTs in axons show a strong bias to become disorganised, most  
145 likely because they are challenged to buckle ('d' in Fig.3) and/or curl up by the narrow  
146 axonal environment enriched in MTs, force generating motor proteins and physical  
147 obstacles posed by organelles and protein complexes (Fig.1, 'A-E' in Fig.3). Once MT  
148 disorganisation occurs, it can develop into pathological axon swellings.

149 (2) The model proposes that this risk is contained through the actions of different classes of  
150 MT-associating and -regulating proteins, which co-operate and complement each other to  
151 form robust machinery that 'tames' MTs into bundles ('1-16' in Fig.3).

152 In this model, each axon segment uses local action of MT regulators to maintain its bundled MT  
153 organisation (hence '*local axon homeostasis*'). Hereditary or acquired loss of single regulators  
154 would be expected to weaken this machinery and increase the statistical risk of MT  
155 disorganisation. Such heightened probability might explain why many axonopathies affect  
156 primarily long axons (Prior et al., 2017), and why certain disorders linked to MT regulators  
157 display late onset of axon decay (Voelzmann et al., 2017).

158 In the next two sections, we discuss potential causes explaining the bias of axonal MTs to  
159 become disorganised. We will then summarise experimentally demonstrated MT bundle-  
160 maintaining mechanisms, and speculate about further mechanisms based on existing  
161 knowledge of known classes of axonal MT-regulating proteins.

162

### 163 Understanding the unusual curling behaviours of MTs in axons

164 Although curvature is a key driver of MT plus end dynamics during de-/polymerisation (Brouhard  
165 and Rice, 2018; van Haren and Wittmann, 2019), MT lattices *in vitro* usually behave as rigid  
166 rods with a persistence length of 1-10 mm (as compared to ~12  $\mu\text{m}$  measured for actin  
167 filaments; Fletcher and Mullins, 2010; Hawkins et al., 2010; Howard, 2001). MTs are polar  
168 polymers composed of  $\alpha/\beta$ -tubulin heterodimers which are arranged in a head-to-tail fashion  
169 into linear protofilaments; usually 13 of these protofilaments are laterally aligned forming a  
170 straight tube of roughly 25 nm diameter (Fig.6A, C). But MTs can deviate from this norm, and  
171 this may introduce an intrinsic element of disorder into MT bundles: for example, axonal MTs  
172 were reported to contain 13 protofilaments in frog olfactory or goldfish brain axons, but 11 or 15  
173 in *C. elegans*, and 12 in *Drosophila*, crayfish and lobster (Benshalom and Reese, 1985; Burton  
174 et al., 1975; Savage et al., 1989). Deviation from the straight 13 protofilament conformation  
175 appears to equip MTs with distinct, functionally relevant physical properties (Chaaban and  
176 Brouhard, 2017; Chalfie and Thomson, 1982). But it also introduces a skew into the MT  
177 structure, which causes a supertwist of the tubule (Fig.6D; Chrétien and Fuller, 2000; Chrétien  
178 et al., 1996; Chrétien and Wade, 1991); this supertwist forces motor proteins to rotate around  
179 MTs (Ray et al., 1993) and is the likely explanation for supercoil of entire axons observed upon  
180 MT bundle destabilisation (Krieg et al., 2017; Shaw and Bray, 1977).

181 Furthermore, MTs are structurally active: their physical properties can change when proteins  
182 bind to them (e.g. kinesins, see below) or when the 'tubulin code' is altered. The tubulin code is  
183 determined by the incorporation of different existing isotopes of  $\alpha$ - and  $\beta$ -tubulin into the MT  
184 lattice, and the addition of a range of distinct post-translational modifications (Fig.6B; Janke and

185 Kneussel, 2010; Park and Roll-Mecak, 2018; Ti et al., 2018; Vemu et al., 2017). Some  
186 modifications influence the interaction with MT-binding proteins (e.g. poly-glutamylation attracts  
187 spastin; Valenstein and Roll-Mecak, 2016), others are believed to structurally protect MTs from  
188 damage or depolymerisation, such as poly-aminations on various residues (Song et al., 2013),  
189 or acetylation of luminal lysine 40 which has been suggested to make MTs more flexible and  
190 break-resistant (Fig.6B; Baas et al., 2016; Howes et al., 2014; Portran et al., 2017; Soppina  
191 et al., 2012; Xu et al., 2017). Notably, site-directed mutation of lysine 40 in *Drosophila*  $\alpha$ 1-tubulin  
192 could demonstrate that intraluminal MT acetylation is physiologically relevant (Jenkins et al.,  
193 2017; Yan et al., 2018). In addition, the MT lumen may contain MIPs (MT inner proteins) that  
194 likely also modify MT stability (Ichikawa and Bui, 2018).

195 These intrinsic or acquired physical properties are likely to determine how MTs respond to  
196 external forces - and we can expect such forces to be highly enriched in axons (see next  
197 section). Some ideas about how forces may impact on axonal MTs can be derived from *in vitro*  
198 experiments. For example, MTs in flow chambers that are anchored at one end, will bend when  
199 applying flow and rapidly return to straight conformation thereafter; when bent repeatedly in this  
200 way, MTs experience structural damage that triggers subsequent repair responses  
201 (Akhmanova, 2018; Schaedel et al., 2015; Triclin et al., 2018); when certain shaft-binding  
202 proteins (e.g. doublecortin or non-motile kinesin-1) are added, MTs become locked in bent  
203 conformation and fail to re-straighten (Bechstetdt et al., 2014; Ettinger et al., 2016; Peet et al.,  
204 2018).

205 Another example is provided by so-called *in vitro* gliding assays, where MTs are moved around  
206 on carpets of active motor proteins. On carpets of (axonemal) dynein, MTs move plus-end-first;  
207 they undergo collisions at high frequency, but seem to stay fairly straight and form vortices at  
208 the millimetre scale (Sumino et al., 2012). In contrast, if similarly prepared MTs are on kinesin  
209 carpets, they move minus-end-first and undergo fewer collisions because they can pass over  
210 one another, likely owed to kinesin-1's adaptable length (Kerssemakers et al., 2006; Palacci et  
211 al., 2016; Sumino et al., 2012); however, if they collide or become pinned to the substrate (e.g.  
212 by dead kinesins) they frequently undergo dramatic shape changes at the micron-scale,  
213 including fishtailing and arc or loop formation (Amos and Amos, 1991; Lam et al., 2016; Weiss  
214 et al., 1991). The smallest diameters of curvature observed are similar to those of curled MTs in  
215 axons with values as low as 1-3  $\mu$ m (Tab.1, Fig.5; Ahmad et al., 2006; Sánchez-Soriano et al.,  
216 2009) - and below 1 $\mu$ m, MTs are believed to break (Odde et al., 1999; Waterman-Storer and  
217 Salmon, 1997).

218 If MTs on kinesin carpets are reversibly cross-linked with biotin-streptavidin, they coalesce into  
219 bundles containing dozens of MTs which frequently curl up into spools with inner diameters  
220 similar to those of loops. Spools can take on similar appearances as looped MT bundles  
221 observed in growth cones of fly or mammalian neurons (Dent and Kalil, 2001; Hess et al., 2005;  
222 Sánchez-Soriano et al., 2010). Furthermore, single MTs can escape from spools which may  
223 trigger spool disassembly (Hess et al., 2005; Liu et al., 2008; VanDelinder et al., 2016b),  
224 bearing some resemblance with off-track MTs in axons.

225 Loops and spools *in vitro* might therefore be an experimental proxy for curling MTs or bundled  
226 loops in axons, and gliding assays might provide mechanistic insights into these MT behaviours  
227 (details in Tab.1): for example, loop formation is favoured by high density of MTs and/or  
228 kinesins (Lam et al., 2014; Liu et al., 2011), and both are clearly given in axons; kinesins directly  
229 impact on MTs (see below), but they can also cause pinning events in gliding assays, which  
230 could be seen as a potential proxy for the abundant obstacles in the narrow axons.  
231 Furthermore, the diameters of curls and spools in gliding assays increase with the degree of MT

232 rigidity (Wada et al., 2015), and their clockwise versus counter-clockwise directionality of circle  
233 formation is a function of the right- versus left-handed supertwist of the MTs involved - all  
234 properties that could potentially be tested in axons (Fig.6D; Kawamura et al., 2008; Liu et al.,  
235 2008). Furthermore, exposure to non-polar interfaces (e.g. n-heptane or air bubbles) induces  
236 strong curling (Rashedul Kabir et al., 2012), and this may be relevant in axons: in ageing or  
237 degenerative disease, changes in physical and chemical parameters of neurons affect liquid-  
238 liquid phase separation (Alberti and Hyman, 2016); liquid compartments likely are of low polarity  
239 (Nakashima et al., 2019) and might therefore influence the curling bias of MTs.

240 MT loops in gliding assays can be surprisingly stable (frequently >5 mins, as reported in Liu et  
241 al., 2011). To explain this, it has been proposed that tubulin-heterodimers on the concave side  
242 of the tube take on a shorter conformation than those on the convex site, and that this  
243 asymmetric distribution can be maintained as an energetically favoured state (Fig.6F, bottom  
244 right; Ziebert et al., 2015). In support of this model, tubulins in non-hydrolysed GMPCPP-MTs  
245 were shown to be 1-3% longer than hydrolysed GDP-tubulin, and taxol added after (but not  
246 during) polymerisation achieves a similar elongation (Fig.6F; Alushin et al., 2014; Amos and  
247 Löwe, 1999; Arnal and Wade, 1995; Castle et al., 2017; Hyman et al., 1995). Notably, this  
248 conformational length change seems physiologically relevant, as its suppression by the T238A  
249 mutation in yeast  $\beta$ -tubulin stabilises MTs *in vivo* and causes mitotic defects (Geyer et al., 2015;  
250 Machin et al., 1995).

251 Such intrinsic properties of MTs may contribute to MT curling in axons, but we also need to  
252 consider the presence of MT lattice-associating proteins, such as tau, doublecortin or kinesin-1  
253 which were reported to bind differently to straight and curved MTs (Balabanian et al., 2017;  
254 Bechstedt et al., 2014; Ettinger et al., 2016; Peet et al., 2018; Samsonov et al., 2004). In  
255 particular kinesins-1 was shown to stabilise MT curvature by extending their lattice to similar  
256 degrees as taxol (Peet et al., 2018), involving local compaction of tubulin that goes beyond  
257 taxol- or GMPCPP-induced effects (Krebs et al., 2004; Morikawa et al., 2015). Since kinesin-1  
258 has a preference for convex MT surfaces and was reported to undergo cooperative binding, this  
259 may lead to a curvature-enhancing and -stabilising snowball effect with an estimated diameter  
260 of curvature of 3.2  $\mu\text{m}$  (Cross, 2019; Muto et al., 2005; Peet et al., 2018). Mathematical  
261 modelling suggests that the kinesin carpet in gliding assays might induce stable yet reversible  
262 curling in this way (Fig.6F, top right; Pearce et al., 2018).

263 Naturally, current models are in their infancy and further findings need to be incorporated. For  
264 example, MTs behave as elastic cylinders (comparable to a garden hose) and can undergo  
265 softening through cross-sectional flattening when strongly bent (Fig.6E; Kononova et al., 2014;  
266 Memet et al., 2018). In this same vein, conformational changes of MTs upon kinesin-1 binding  
267 were reported to soften MTs locally (Kabir et al., 2014). If confirmed, this would have important  
268 implications for any existing models; together with the kinesin-induced tubulin compaction  
269 (yellow asterisks in Fig.6F), it might be a mechanism to absorb energy and reduce the shear  
270 force load on MTs. Notably, softening of MTs is also observed upon taxol application (usually  
271 used in gliding assays; Tab.1; Castle et al., 2017) or MT acetylation (abundant in axons; Portran  
272 et al., 2017; Xu et al., 2017), and might be a common prerequisite for curling behaviours.

273 Loop and spool formation in gliding assays are considered processes of 'active self-  
274 organisation' (Lam et al., 2016); given the above listed similarities, the same might be true for  
275 the formation of MT disorganisation in axons. Any *in vitro* studies addressing MT bending can  
276 provide potential mechanisms that could underlie MT curling in axons; gliding and flow chamber  
277 assays both suggest motor proteins, in particular kinesins, as key factors. In the next section we  
278 will therefore summarise roles of axonal MT-associated motors during axon pathology.

279

280 The intricate relationship between MTs and their associated motor proteins

281 MT-associated motors comprise the minus end-directed dynein/Dynactin complex and the  
282 mostly plus-end directed proteins of the kinesin family (Hirokawa et al., 2010). Several kinesins  
283 display direct roles in MT regulation (Sturgill and Ohi, 2013). These include active MT  
284 depolymerisation (kinesin-8, -13; Walczak et al., 2013), MT polymerisation (kinesin-2, -5; Chen  
285 and Hancock, 2015; Gumy et al., 2013; Guzik-Lendrum et al., 2017), MT-cross-linkage (kinesin-  
286 5, -6, -12; see section on bundling), and roles in promoting MT orientation as a feature of  
287 neuronal polarity (Tas et al., 2017; Zheng et al., 2008).

288 However, most attention is given to the active cargo and organelle transport and dynamics in  
289 axons (Fig.3A-E; see section on axonal cytoskeleton), which is driven retrogradely by  
290 dynein/Dynactin (Allan, 2011) and anterogradely by kinesins (primarily kinesin-1, -2, and -3;  
291 Hirokawa et al., 2010). The forces imposed by these dynamics and/or the size of cargoes  
292 moved, poses an obvious challenge to MT bundles (Appert-Rolland et al., 2015) and might be  
293 an important factor leading to MT disorganisation.

294 Clearly, there is an intricate mutual regulatory relationship and finely tuned balance between the  
295 amount of transport, and the structural properties of the transport highways (Appert-Rolland et  
296 al., 2015; Prokop, 2013). On the one hand, MTs influence transport: for example, MT density is  
297 higher in small calibre axons than in large axons (~15 versus ~150 MTs/ $\mu\text{m}^2$ ), and mathematical  
298 modelling suggests that this is required to achieve the same transport efficiency as in large  
299 axons (Wortman et al., 2014; and references within); furthermore, the tubulin isotype  
300 composition of MTs, their posttranslational modifications, and the physical presence of other  
301 MT-binding proteins influence motor protein dynamics ('a' in Fig.3; Balabanian et al., 2017;  
302 Monroy et al., 2018; Sirajuddin et al., 2014; Subramaniyan Parimalam et al., 2016). *Vice versa*,  
303 transport affects MT bundles: for example, kinesin binding changes the physical properties of  
304 MTs (see previous section), and motor proteins cause damage to the MTs they walk on,  
305 triggering maintenance responses including MT repair or potentially even replacement ('14' in  
306 Fig.3; Akhmanova, 2018; Dumont et al., 2015; Peet et al., 2018; Triclin et al., 2018; VanDelinder  
307 et al., 2016a).

308 Tipping the balance in this mutual relationship can easily be imagined to cause reciprocal  
309 deficiencies in transport rate and MT bundle organisation. For example, disorganisation or  
310 partial breakage of MTs has been reported to cause pathological transport deficits (option '1' in  
311 Fig.4; Fiala et al., 2007; Tang-Schomer et al., 2012). *Vice versa*, immunological lesioning  
312 experiments to induce demyelination (Abdul-Majid et al., 2000; Baker et al., 1990), initially  
313 caused transport defects, which were then followed by MT disorganisation ('2' in Fig.4; Sorbara  
314 et al., 2014). Analogously, we observe severe MT disorganisation in *Drosophila* primary  
315 neurons upon loss of kinesin-1 or -3 ('2' in Fig.4; unpublished; kinesin-1 shown in Fig.5E).

316 How loss of these kinesins may cause MT disorganisation can currently only be hypothesised.  
317 For example, it has been reported for dendrites that kinesin-1 migrates on acetylated and  
318 kinesin-3 on tyrosinated MTs (Tas et al., 2017). Provided the same is true in axons, the loss of  
319 kinesin-1 would relieve acetylated MTs, but tyrosinated MTs would still bear their full transport  
320 load - and *vice versa*. Such imbalances in transport distribution within MT bundles could lead to  
321 shear forces that buckle MTs and seed MT disorganisation. In the same vein, MT  
322 disorganisation was reported to be triggered by directional changes in motor traffic upon  
323 deficiency of the dynein regulator NDEL1 at the axon initial segment (Kuijpers et al., 2016).  
324 Furthermore, the movement of large cargoes likely induces dynamic and transient



325 rearrangements of local MT-MT crosslinking networks (see section on cross-linkage) to make  
326 the necessary space; in this scenario, violating the balanced proportion between cross-linkers  
327 and transport may be a path to bundle aberration.

**Box 3.** The intricate relationship between MTs and axonal organelles

Mitochondria are the main source for ATP (Sheng, 2017), required to fuel multiple processes relevant for MT regulation (red arrows in Fig.3); these include actin assembly and dynamics relevant for MT regulation (Krendel and Mooseker, 2005; Skruber et al., 2018), protein phosphorylation for example of MT regulators (Bogoyevitch and Fairlie, 2007), GTP production required for MT polymerisation and signalling (Berg et al., 2002; Hall and Lalli, 2010; Voelzmann et al., 2016a), MT severing (McNally and Roll-Mecak, 2018), and MT-motor dynamics (Hirokawa et al., 2010; but note that vesicular transport uses local glycolysis to generate its own ATP; yellow star in Fig.3A; Hinckelmann et al., 2016; Zala et al., 2013). Secondly, the mitochondrial surface is an important signalling platform potentially required to orchestrate MT regulation locally (not shown in Fig.3; McBride et al., 2006). Thirdly, mitochondria cooperate with ER in the regulation of intracellular free calcium (yellow cloud in Fig.3; Rieusset, 2017; Wu et al., 2017) which has direct impact on MT regulators (e.g. spectraplakins, tau, kinesins; Kapur et al., 2012; McVicker et al., 2015) or even on MTs themselves (O'Brien et al., 1997). Fourthly, mitochondria collaborate with peroxisomes in the regulation of reactive oxygen species ('ROS' in Fig.3; Fransen et al., 2017; Pascual-Ahuir et al., 2017), which have known effects on MT regulation (Wilson and Gonzalez-Billault, 2015). If excessive amounts of the wrong ROS species are produced upon transport-induced mitochondrial damage or dysregulation of the mitochondria-peroxisome system, this causes oxidative stress as a major path to axon pathology (Fiala et al., 2007; Liu et al., 2017; Pascual-Ahuir et al., 2017).

Such causative relationships between MTs and oxidative stress can be experimentally demonstrated: for example the MT-stabilising drug epothilone B rescues oxidative stress caused by peroxisome transport deficiencies in a human iPSC model of SPG4 (spastin-linked spastic paraplegia 4; Wali et al., 2016), suggesting that MTs are the cause for the transport deficit in the first place.

Similar interdependencies would apply to other important organelles or membrane compartments that likewise depend on MT-binding motor proteins to undergo meaningful dynamics (Fig.3D); of particular importance are the ER with its multiple roles in calcium homeostasis, protein synthesis and lipidogenesis (Gonzalez and Couve, 2014), or the endolysosomal system required for proteostasis (Winckler et al., 2018). Also drug-induced inhibition of the proteasome-ubiquitination system has been shown to induce alteration in MTs and axonal transport (Poruchynsky et al., 2008; Staff et al., 2013).

328

329 Alternatively, transport defects might affect MTs through biochemical routes, simply caused by  
330 the fact that the bundle-maintaining machinery runs out of supply and/or regulators. One would  
331 expect deficient supply (a) of tubulin heterodimers as building blocks, (b) of the proteins  
332 required to execute MT bundle maintenance work ('b' in Fig.3), and an absence or wrong  
333 distribution (c) of organelles which are expected to play major roles in MT bundle maintenance  
334 (see Box 3 for details).

335 Functional interdependencies between transport, organelle dynamics and MTs provide potential  
336 explanations for a number of observations. For example, they may explain why axonal swellings

337 induced by senile plaques in the *Tg-swAPP<sup>P7p</sup>* mouse (overexpressing an amyloid precursor  
338 protein carrying a familial Alzheimer's disease-linked mutation; Stokin et al., 2008) were strongly  
339 enhanced when removing one copy of the KLC1 gene (a linker required for kinesin-1 mediated  
340 transport) - and this effect is conserved in *Drosophila* (Stokin et al., 2005). They may explain  
341 why different types of Charcot-Marie-Tooth disease or hereditary spastic paraplegias can be  
342 caused through motor proteins as well as regulators of membranous compartments  
343 (Blackstone, 2018; Bucci et al., 2012). They may also explain why MT stabilising drugs can be  
344 beneficial in animal models of neurodegeneration as diverse as SPG4 (Box 3) and Alzheimer's  
345 disease (Brunden et al., 2014).

346 Naturally, the argumentative framework presented here is highly speculative, given the  
347 enormous complexity of the relationships between MT bundle organisation, motor protein  
348 activity and systemic factors. But we hope that these reflections will motivate experimenters to  
349 have a closer look at MTs in future studies of axon biology and pathology, and include  
350 statements in their reports as to whether MTs are affected. More data are urgently needed,  
351 which does often not require more than analysing neuronal morphology with antisera against  
352 MTs (rather than restricting to intermediate filaments), or increasing the magnification in  
353 ultrastructural studies to have a closer look at MTs. In the following sections we will explore the  
354 mechanisms that are potentially used to form and maintain MT bundles against the odds of  
355 motor-induced aberration or damage.

356

#### 357 MT polymerisation as a fundamental requirement for bundle maintenance

358 The *de novo* formation of MT bundles during developmental, plastic or regenerative axon  
359 growth ('8' in Fig.3) requires MT polymerisation. At later stages, MTs continue to undergo  
360 polymerisation {Kleele et al., 2014; Voelzmann et al., 2016a}, likely to maintain a steady state  
361 and prevent MT senescence through polymerisation-dependent MT repair and/or turn-over ('14'  
362 in Fig.1; Akhmanova, 2018; Triclin et al., 2018). A well-regulated machinery of MT  
363 polymerisation and disassembly (blue stippled arrows in Fig.3) is therefore needed to keep the  
364 numbers of axonal MTs in balance with the transport load (see previous section; Wortman et al.,  
365 2014).

366 As we detailed in a previous review (Voelzmann et al., 2016a), the machinery of MT de-  
367 /polymerisation requires three sub-machineries: (1) dynamic protein complexes at the MT plus  
368 end (blue balls, 'Eb1' in Fig.3); (2) the supply of  $\alpha/\beta$ -tubulin heterodimers as building blocks  
369 which occurs through a complex regulatory network in close co-regulation with MT dynamics ('c'  
370 in Fig.3; Al-Bassam, 2017; Gasic and Mitchison, 2018; Preitner et al., 2014); (3) proteins which  
371 bind or post-translationally modify the MT lattice with impact on plus end dynamics, for example  
372 by stabilising MTs against depolymerisation ('7' in Fig.3).

373 The fine-tuning of net MT polymerisation appears to depend on complex regulatory networks.  
374 This is illustrated by our recent work in *Drosophila* neurons, showing that loss of cortical actin  
375 rings in the axon shaft (Fig.1) causes a reduction in MT polymerisation speed, eventually  
376 affecting MT bundle integrity; simultaneous application of MT-destabilising drugs or removal of  
377 the MT-stabilising spectraplakin Short stop (Shot) exacerbated these effects, frequently even  
378 eliminating entire axons (Qu et al., 2017). Similar dependencies of MT polymerisation on actin  
379 networks are suggested by other reports: (1) parallel loss of spectrin and tau causes axonal MT  
380 loss in *C. elegans* (Krieg et al., 2017); (2) axon-shortening induced by the MT-stabiliser taxol  
381 can be ameliorated through co-application of actin-destabilising drugs (in both chick and  
382 *Drosophila* neurons; Letourneau et al., 1987; Sánchez-Soriano et al., 2010); (3) application of

383 actin-destabilising drugs changes the tubulin-to-microtubule ratio in PC12 cells (Dennerll et al.,  
384 1988) and causes axon retraction in chick dorsal root ganglia neurons (Datar et al., 2019; see  
385 also Box 4). The best explanations for the mechanistic links from actin networks to net MT  
386 polymerisation are currently provided by biomechanical models (see Box 4).

#### Box 4. Biomechanical models of axon growth

The regulation of axonal growth dynamics has been explained in terms of balance of forces between the microtubule and actin cytoskeleton (de Rooij et al., 2018; Fan et al., 2017; Miller and Suter, 2018). In axons, “*actin is under tension supported in part by microtubules under compression*” (Dennerll et al., 1988; Heidemann and Buxbaum, 1990). Tension is provided by the pull of the growth cone (Chan and Odde, 2008; Koch et al., 2012; Lamoureux et al., 1989) and the active contraction of acto-myosin along the axon shaft (Fan et al., 2017; O’Toole et al., 2015; Fig.1); the stiff nature of cross-linked MT bundles is well suited to oppose compressive forces up to a certain threshold (Buxbaum and Heidemann, 1992; de Rooij et al., 2018; Fig.2).

In such a balanced system, manipulations such as externally imposed pulling forces (Bray, 1984; Lamoureux et al., 2010; Pfister et al., 2004; Zheng et al., 1991) or genetic/pharmacological de-/stabilisation of acto-myosin (Ahmad et al., 2000; Datar et al., 2019; Dennerll et al., 1988; Ketschek et al., 2007; Turney et al., 2016; Wylie and Chantler, 2008) clearly modulate axon length or growth. Part of this response is expected to be due to changes in MT assembly, as was found when applying external forces to non-neuronal cells (Kaverina et al., 2002). But MTs themselves are not only responders in this context: the dis-/assembly or motor-based sliding of MTs can actively contribute by generating forces (Ahmad et al., 2000; Brouhard and Rice, 2018; Roossien et al., 2014; Winding et al., 2016).

How forces are sensed and translated into compensatory force generation and/or changes in axonal length or growth, remains an important question (see also the last section on cortical anchorage). Potential mechanisms might involve mechanically induced conformational changes of MTs (single MTs polymerise faster when being pulled on *in vitro*) or responses of polymerases such as XMap215 (Brouhard and Rice, 2018); but especially mechano-sensitive calcium channels in the axonal membrane (Franze et al., 2009; He et al., 2019; Heidemann and Buxbaum, 1990; Song et al., 2019) are promising candidates to orchestrate local responses that can even go beyond mere changes in MT polymerisation.

387

388

#### 389 Maintaining MTs bundles through cortical guidance and elimination of polymerising MTs

390 Whilst MT polymerisation is a requirement for axon formation and maintenance, it also poses a  
391 risk: for example, extending MTs may be obstructed by the abundant organelles or protein  
392 complexes in axons, thus causing accidental 'off-track' MTs that project out of the bundle  
393 towards the cortex ('4' in Fig.3). Apart from MT buckling, off-track MTs may be a second cause  
394 for axonal MT disorganisation.

395 A key factor preventing this from happening is Eb1 (Alves-Silva et al., 2012; Figs.3 and 5B).  
396 Eb1 directly binds at extending MT plus ends where it promotes polymerisation (Zanic et al.,  
397 2013) and serves as a scaffold for many other proteins (Gupta et al., 2014). In the absence of  
398 Eb1, MTs are severely disorganised, indicating important roles in MT maintenance (Alves-Silva  
399 et al., 2012). One underlying mechanism is the guidance of polymerising MTs through binding  
400 of Eb1 to Short stop (Shot); Shot is a well-conserved spectraplaklin, able to cross-link cortical

401 actin, MTs and Eb1 ('5' in Fig.3), thus guiding polymerising MTs in parallel to the axonal surface  
402 and laying them out into parallel bundles (Alves-Silva et al., 2012). Accordingly, also loss of  
403 Shot causes severe MT disorganisation in axons - and the same is true for its two mammalian  
404 homologues ACF7 and dystonin (Bernier and Kothary, 1998; Dalpe et al., 1998; Sánchez-  
405 Soriano et al., 2009; Voelzmann et al., 2017) - of which the latter links to the axonopathy  
406 HSAN6 (type 6 hereditary sensory and autonomic neuropathy; Edvardson et al., 2012).

407 Such cortical guidance is complemented by at least one control mechanism: if MTs  
408 (accidentally) leave their bundled arrangements and extend towards the cortex, they get  
409 eliminated by Efa6 ('4' in Fig.3), a cortical collapse factor that associates with the axonal  
410 membrane via its C-terminal plekstrin homology domain; when Efa6 is absent, off-track MTs  
411 outside axonal MT bundles persist for longer and are higher in number (Qu et al., 2018).  
412 Consistent with the known roles of off-track MTs in axon growth, branching and MT  
413 disorganisation (see Box 1 and above), neurons lacking Efa6 display longer axons, more  
414 branches and prominent MT disorganisation (Fig.5D; Qu et al., 2018).

415 Our model would predict that mutant phenotypes caused by loss of Shot and Efa6 should  
416 enhance each other because they are caused through complementary mechanisms of MT  
417 bundle regulation. Accordingly, we found a clear increase in MT disorganisation when removing  
418 both Shot and Efa6 from the same neurons, in culture and *in vivo* (Qu et al., 2018). We propose  
419 therefore that Shot and Eb1 keep MTs away from the membrane, whereas Efa6 acts as a  
420 quality control factor eliminating occasional accidental off-track MTs; this elimination seems to  
421 occur in moderate, well-balanced amounts so that 'intended' off-track MTs required for axon  
422 growth and branching can persist and perform their function.

423 Interestingly, the cortical collapse function of Efa6 is not conserved in vertebrates (Qu et al.,  
424 2018). Nevertheless, the concepts derived from Efa6 studies appear relevant, because loss of  
425 the unrelated neuronal cortical collapse factor KIF21A (a type 4 kinesin) causes analogous  
426 phenotypes in mammalian neurons. Thus, KIF21A mutations linked to the neurodevelopmental  
427 disorder CFEOM1 (type 1 congenital fibrosis of the extraocular muscles) affect axon growth and  
428 axonal branching just like Efa6 (Qu et al., 2018; van der Vaart et al., 2013) - and might as well  
429 cause MT disorganisation, but no data are currently available.

430 However, guidance along cortical actin seems not the only mechanism through which Eb1 and  
431 Shot keep MTs on track. This is illustrated by the simple fact that MT disorganisation observed  
432 upon loss of Shot or Eb1 (Fig.5B, E) does not occur when removing actin from axon shafts  
433 (Alves-Silva et al., 2012; Qu et al., 2017; Sánchez-Soriano et al., 2010). This suggests that both  
434 factors perform additional, actin-independent functions or interactions to promote MT bundles.

435 For example, the unusual Shot-PH isoform, which is highly enriched in the nervous system and  
436 harbours a plakin repeat region (PRR; conserved in mammalian spectraplakins), is a likely  
437 candidate for such roles that still await investigation ('11' in Fig.3; Hahn et al., 2016; Voelzmann  
438 et al., 2017). Eb1 has a long list of protein interactors besides Shot (Gupta et al., 2014), and  
439 some of them might associate with MTs and guide extending plus ends along pre-existing  
440 bundles ('9' in Fig.3); for example, APC or GAS2-LIKE family members (Pickled eggs/Pigs in  
441 *Drosophila*) are good candidates, known to bind both MTs and Eb1 in mammals and *Drosophila*  
442 (Beaven et al., 2015; Pines et al., 2010; Stroud et al., 2014).

443

#### 444 Potential roles of severing proteins and MT-destabilising kinesins in MT bundle maintenance

445 Apart from cortical MT elimination, also MT severing and/or depolymerisation in the cytoplasm

446 may play important roles in maintaining axonal MT bundles. This is supported by axonal MT  
447 disorganisation observed upon the losses of *Drosophila* katanin (our unpublished results) or  
448 mammalian spastin (Denton et al., 2014; Fassier et al., 2013; Havlicek et al., 2014; Tarrade et  
449 al., 2006).

450 As explained in the previous section, MTs leaving the bundled conformation can drive axonal  
451 growth, branching and MT disorganisation, and cortical collapse factors negatively regulate all  
452 three processes. In line with this argumentation, also the MT-depolymerising kinesin-13 family  
453 member Kif2A (Homma et al., 2003) and MT severing proteins (spastin, katanin and fidgetin)  
454 were reported to inhibit neurite growth and/or branching (Leo et al., 2015; Mao et al., 2014; Tao  
455 et al., 2016). However, other studies of spastin, katanin and fidgetin led to contradictory  
456 findings, describing them as promoters rather than inhibitors of neurite growth and branching  
457 (Ahmad et al., 1999; Butler et al., 2010; Havlicek et al., 2014; Karabay et al., 2004; Riano et al.,  
458 2009; Stewart et al., 2012; Stone et al., 2012; Wood et al., 2006; Yu et al., 2008). Such stark,  
459 potentially context-dependent deviations seem to reflect the complex regulation of severing  
460 proteins.

461 Spastin, katanin and fidgetin are all members of the superfamily of AAA proteins (ATPases  
462 associated with diverse cellular activities; McNally and Roll-Mecak, 2018; Sharp and Ross,  
463 2012; Zhang et al., 2007), but their severing activity is differentially regulated through their  
464 individual responses to (a) posttranslational MT modifications (in particular acetylation and  
465 poly-glutamylated; Bailey et al., 2015; Lacroix et al., 2010; Leo et al., 2015; Shin et al., 2019;  
466 Sudo and Baas, 2010; Valenstein and Roll-Mecak, 2016), (b) antagonistic MT shaft-binding  
467 proteins such as tau (Qiang et al., 2018; Qiang et al., 2006; Yu et al., 2008), or (c) spatial  
468 recruitment through specifically localised proteins such as CAMSAP (Jiang et al., 2018).  
469 Furthermore, katanin has the ability to depolymerise MTs in an ATP-independent manner  
470 (Belonogov et al., 2019).

471 Through this precise context-dependent spatiotemporal regulation of their activities, severing  
472 proteins can have two diametrically opposed outcomes: they either eliminate MTs and reduce  
473 their numbers, or they break them up into stable fragments that serve as seeds for MT  
474 amplification (Baas et al., 2016; McNally and Roll-Mecak, 2018; Vemu et al., 2018). In the  
475 following, we will briefly discuss how either of these outcomes could be used to prevent MT  
476 disorganisation:

477 First, MT severing proteins could complement roles of cortical collapse factors ('4' in Fig.3) by  
478 serving as quality control factors that eliminate disorganised MTs in the cytoplasm ('6' in Fig.3).  
479 For example, katanin in plant cells was reported to localise and sever preferentially at MT cross-  
480 points, which can be used to take out non-aligned MTs (McNally and Roll-Mecak, 2018).

481 Second, MT shortening functions of katanin are required at MT minus ends. Thus, in both  
482 mammals and *Drosophila*, the minus-end capper CAMSAP/Patronin protects against MT  
483 disassembly, and recruits katanin to counterbalance against uncontrolled minus-end  
484 polymerisation ('13' in Fig.3; Goodwin and Vale, 2010; Jiang et al., 2018; Nashchekin et al.,  
485 2016); uncontrolled minus end extension upon katanin deficiency may cause MTs to go off-track  
486 or to buckle through extra forces produced.

487 Third, MT elimination functions could prevent MT bundle senescence. For example, MTs suffer  
488 from damage through tear-and-wear (Dumont et al., 2015; Peet et al., 2018; Schaedel et al.,  
489 2015; Triclin et al., 2018; VanDelinder et al., 2016a), which might cause bundle aberration by  
490 abrogating interactions with MT-binding proteins (red cross at '16' in Fig.3). MT fractures or  
491 holes can be repaired through mechanisms involving katanin or spastin (Davis et al., 2002;

492 Diaz-Valencia et al., 2011; Gasic and Mitchison, 2018; Triclin et al., 2018; Vemu et al., 2018).  
493 More subtle features of senescence (e.g. irreversible modifications, loss of tubulin C-tails) might  
494 require selective elimination of ageing MTs through severing factors (as similarly suggested for  
495 kinesin-8 or -13; Gardner et al., 2011), followed by compensatory polymerisation ('14' in Fig.3).  
496 For example, spastin deficiency in the *Sp<sup>d</sup>* mouse model causes a drop in MT polymerisation  
497 (which might reflect reduced turn-over) accompanied by a rise in MT disorganisation (which  
498 might be due to precocious MT senescence; Fassier et al., 2013).

499 However, the MT phenotypes observed in the *Sp<sup>d</sup>* mouse model could likewise be explained  
500 through the opposite role of spastin in MT multiplication. Thus, in the absence of spastin-  
501 mediated amplification, MT numbers might gradually decline and cause transport interruptions;  
502 this, in turn, would affect MT bundle organisation and eventually cause axonal pathology (see  
503 section on motor proteins; Wali et al., 2018; Wali et al., 2016). Curiously, axon swellings in this  
504 model were reduced with low doses of MT-stabilising or -destabilising drugs (Fassier et al.,  
505 2013), therefore failing to provide any clues as to whether spastin works through MT turn-over  
506 or amplification in this context.

507 Understanding spastin is important because it is by far the most prominent factor linking to  
508 spastic paraplegias worldwide (Koh et al., 2018; Schüle et al., 2016), and axonal swellings are a  
509 hallmark of the disease (Blackstone, 2018; Zempel and Mandelkow, 2015). Most SPG4-linked  
510 mutations lie within the AAA-ATPase domain (Shoukier et al., 2009), suggesting that MT  
511 severing is key to the disease pathology. However, point mutations might generate versions of  
512 spastin, which either act as dominant negative alleles (forming dysfunctional complexes that  
513 titrate out other spastin-interacting factors), or acquire gain-of-function qualities by diffusing  
514 away to perform very different roles. One such MT-independent role of spastin is the isoform-  
515 specific regulation of the endoplasmic reticulum ('15' in Fig.3), including its shape, its interaction  
516 with the endosome and its production of lipid droplets (Allison et al., 2017; Papadopoulos et al.,  
517 2015; Park et al., 2010; Solowska and Baas, 2015). It is therefore difficult to exclude that at  
518 least part of those SPG4-linked mutations triggers axon decay through other routes than the  
519 direct induction of MT aberrations ('2' or '3' versus '1' in Fig.4).

520

#### 521 Potential roles of MT-MT cross-linkage in MT bundle maintenance

522 MT-MT cross-linkage ('12' in Fig.3) is likely the oldest mechanistic concept put forward by  
523 neurobiologists to explain MT bundles (Lee and Brandt, 1992) and appears an obvious means  
524 of suppressing MT disorganisation. Physical cross-linking strands between axonal MTs were  
525 observed decades ago (Hirokawa, 1982; Hirokawa, 1986), and mathematical models support  
526 MT-MT cross-linkage as an important structural feature of axons (e.g. de Rooij and Kuhl, 2018;  
527 Lazarus et al., 2015; Li et al., 2018; Peter and Mofrad, 2012). To illustrate this point, axons have  
528 been described as a “*stiff spring in series with a viscoelastic (Voight) element composed of a*  
529 *less stiff spring in parallel with a fluid dashpot*” (Heidemann et al., 1990), meaning that axons  
530 are under rest tension and combine elastic and viscous properties. A central structural  
531 component underpinning such properties is likely provided by networks of MT-MT cross-linkers  
532 (Fig.2), where each linker is able to detach upon super-threshold pull or compression, and re-  
533 attach thereafter (slip-bonds). However, the molecular players mediating MT-MT cross-linkage  
534 remain surprisingly controversial to this day, as explained in the following.

535 First, showing that a neuronal linker expressed in non-neuronal cells induces MT bundling, is  
536 insufficient proof: MT bundling can even be achieved through expression of isolated MT-binding  
537 domains, or the application of the MT-stabilising drug taxol which causes bundles with

538 ultrastructural cross-bridges that are indistinguishable from those induced by tau or MAP2  
539 (Chapin et al., 1991; DeBonis et al., 2015; Goriounov et al., 2003; Kader et al., 2017; Lee and  
540 Brandt, 1992).

541 Second, dynamin is linked to Charcot-Marie-Tooth disease and has been shown to bundle MTs  
542 *in vitro*; however, the physiological relevance of this is questionable, because dynamin *in vivo*  
543 seems to bind primarily membranes (Scaife and Margolis, 1990; Shpetner and Vallee, 1989;  
544 Züchner et al., 2005).

545 Third, MTLC1 and MAP1B (Futsch in *Drosophila*) appear ideal cross-linkers, because they both  
546 possess an N- and a C-terminal MT-binding domain; they were shown to induce MT bundles  
547 upon expression in non-neuronal cells (with MAP1B being a weak bundler; Kader et al., 2017;  
548 Penazzi et al., 2016; Satake et al., 2017), and the fly homologue Futsch promotes looped MT  
549 bundles at synaptic terminals (Roos et al., 2000). Upon loss-of-function, MTLC1 causes MT  
550 disorganisation at the axon initial segment, strongly supporting its role as MT-MT cross-linker in  
551 this specific compartment (Satake et al., 2017). In contrast, the long history of MAP1B/Futsch  
552 research is mostly dedicated to aspects of axon development (Hummel et al., 2000; Migh et al.,  
553 2018; Villarroel-Campos and Gonzalez-Billault, 2014), but we are aware of only one isolated  
554 report showing axonal bundle defects (upon loss of Futsch; Bettencourt da Cruz et al., 2005).

555 Fourth, the other conserved linker candidate tau, has only one central MT-binding region, but it  
556 achieves physical MT-MT linkage *in vitro* through N-terminal dimerisation (Chung et al., 2016;  
557 Méphon-Gaspard et al., 2016; Rosenberg et al., 2008). However, its dwell time on MTs seems  
558 very short (Janning et al., 2014; Samsonov et al., 2004); similar to MAP1B/Futsch, reported tau-  
559 deficient phenotypes in neurons mainly concern developmental defects (Penazzi et al., 2016),  
560 but we are aware of only one report of bundle aberration (in *C. elegans*; Krieg et al., 2017;  
561 Penazzi et al., 2016).

562 Pinpointing roles of tau or MAP1B/Futsch in MT-MT cross-linkage is enormously complicated by  
563 the fact that both proteins seem to perform a whole array of further molecular functions relevant  
564 for MT dynamics. For example, tau can protect MTs from severing by katanin (Qiang et al.,  
565 2006), bind tubulin hetero-dimers (Shin et al., 2018), switch between bundled and single MT  
566 states (Prezel et al., 2018), cross-link MTs with actin or the cortex (Biswas and Kalil, 2018;  
567 Cabrales Fontela et al., 2017; Maas et al., 2000), stabilise MTs during axon initiation (Brandt,  
568 1998), maintain labile domains along MT shafts (Qiang et al., 2018), regulate End-binding  
569 proteins (Sayas et al., 2015), compete with kinesins (Trinczek et al., 1999), and promote MT  
570 nucleation and polymerisation (Penazzi et al., 2016). A similarly broad pleiotropy has been  
571 reported for MAP1B (Villarroel-Campos and Gonzalez-Billault, 2014).

572 Pinpointing relevant MT-MT cross-linking activities of specific factors is also complicated by  
573 functional redundancies. For example, *MAP1B* and *tau* mutations have enhanced growth  
574 phenotypes when combined in double-mutant mouse neurons (Takei et al., 2000), and co-  
575 expression of Futsch and Tau causes enhanced phenotypes in the *Drosophila* CNS (Hummel et  
576 al., 2000). Functional redundancies likely extend to further potential cross-linkers. For example,  
577 Kinesin-5 (KIF11), kinesin-6 (KIF23, Pavarotti in *Drosophila*) and kinesin-12 (KIF15) slide anti-  
578 parallel MTs in the mitotic spindle (Baas, 1999); in axons MTs are arranged in parallel, and  
579 these kinesins seem to inhibit sliding (Dong et al., 2019; Lin et al., 2012; Liu et al., 2010; Lu et  
580 al., 2013; Myers and Baas, 2007; Nadar et al., 2012), indicating that they cross-link MTs. In  
581 support of this idea, we observe that loss of *Drosophila* Pavarotti causes axonal MT  
582 disorganisation which might reflect potential linker function (unpublished data).

583 In conclusion, MT-MT cross-linkage is a widely accepted concept, but experimental support for

584 its existence in axons and our knowledge of the molecular players involved is insufficient. We  
585 even cannot fully exclude a model where MT bundles are held together by the corset of  
586 contractile cortical actin rings (Fig.1), and cross-linkers merely separate MTs to generate space  
587 for transport (Fan et al., 2017). If we are to decipher the true molecular nature of MT-MT cross-  
588 linkage in axons, future studies will have to address the challenges of functional redundancies  
589 between different classes of linker candidates.

590

### 591 Does MT bundle maintenance involve their anchorage to the axonal surface?

592 Apart from cross-linking MTs within axonal bundles, they might also be anchored to the axon  
593 wall, thus achieving an even more stable structure that can prevent MT buckling and bundle  
594 deformation caused by the enormous forces imposed by axonal cargo transport. Relevant in  
595 this context are observations in developing vertebrate and fly neurons of a gradual flow of MT  
596 bundles towards the distal axon tip (Miller and Sheetz, 2006; O'Toole et al., 2008; Reinsch et  
597 al., 1991; Roossien et al., 2013). Forces contributing to this process could be derived from an  
598 increase in MT volume through polymerisation along the axon shaft (Sánchez-Soriano et al.,  
599 2010), pulling forces in the rear of growth cones (O'Toole et al., 2015), thermal motion of MT-  
600 MT cross-linkers (Lansky et al., 2015), kinesins actively sliding MTs along other MTs ('B' in  
601 Fig.3; Lu and Gelfand, 2017), or dyneins sliding MTs along cortical F-actin ('10' in Fig.3; Ahmad  
602 et al., 2006; He et al., 2005; Myers et al., 2006; Roossien et al., 2014).

603 Potential MT sliding along cortical actin would represent one form of tethering MT bundles to the  
604 axonal surface. Such anchorage is also suggested by observed co-drift of the axolemma with  
605 the axon core (Lamoureux et al., 2010; Popov et al., 1993; Zheng et al., 1991). But anchorage  
606 would not have to be static; for example, it might involve an interface of slip-bonds, as similarly  
607 suggested for actin networks that flow across, whilst dynamically anchoring to, relatively stable  
608 focal adhesion sites (Case and Waterman, 2015). MTs could anchor to cortical actin (Fig.1; '2' in  
609 Fig.3; Xu, 2013 #6895) or to membrane-associated or transmembrane proteins including ion  
610 channels, ion transporters or adhesion factors (Fig.1; '3' in Fig.3). Links to transmembrane  
611 proteins could be used as mechano-sensing modules (Yap et al., 2018) to measure local shear  
612 forces generated between MT bundles and the axonal environment (Fig.1). Such mechano-  
613 sensing could explain local regulation phenomena: for example, net rates of mitochondrial  
614 movement along the axon are fairly constant, but the slow transport component (driven by MT  
615 bundle flow) is low in proximal and high in distal axon segments; this gradual increase in the  
616 amount of slow transport is compensated for by fast transport (high proximal, low distal; Miller  
617 and Sheetz, 2006). The regional amount of fast mitochondrial transport could potentially be  
618 regulated by mechano-sensing, measuring the local MT drift rate relative to the outer axonal  
619 environment.

620 Apart from dynein (see above), other potential anchoring mechanisms can be deduced from the  
621 literature. For example, spectraplakins are good candidates, as suggested by distal shift of  
622 axonal MTs in fly neurons lacking the *Drosophila* spectraplakin Shot and treated with the MT-  
623 stabilising drug taxol (Voelzmann et al., 2017). Three distinct mechanisms could account for  
624 spectraplakin-mediated MT anchorage: Firstly, spectraplakins could directly cross-link actin and  
625 MTs ('2' and '5' in Fig.3). Secondly, they could link to membrane-associated proteins; thus, the  
626 mammalian spectraplakin dystonin can link to  $\beta$ 4-integrin and transmembrane collagen XVII ('3'  
627 in Fig.3; Voelzmann et al., 2017), and *Drosophila* Shot is able to regulate the axonal localisation  
628 of the cell adhesion molecule Fasciclin 2, potentially cross-linking Fasciclin 2 to MT bundles  
629 (Bottenberg et al., 2009; Prokop et al., 1998). Thirdly, spectraplakins were shown in non-  
630 neuronal cells of fly and mammals to anchor MT minus ends to the cortex ('1' in Fig.3;



631 Nashchekin et al., 2016; Ning et al., 2016; Noordstra et al., 2016); this mechanism requires  
632 interaction with the MT minus end-stabilising factor CAMSAP/Patronin, a factor that is known to  
633 be relevant for neuronal morphology (Yau et al., 2014).

634 Also other MT-binding proteins, such as tau, MAP1B, APC and dynamin, might be involved in  
635 anchorage since they were also reported to bind to actin or to the cortex ('2' in Fig.3; Biswas  
636 and Kalil, 2018; Blanchoin and Michelot, 2012; Brandt et al., 1995; Elie et al., 2015; Gu et al.,  
637 2010; Maas et al., 2000; Mohan and John, 2015; Villarroel-Campos and Gonzalez-Billault,  
638 2014). But potential MT-actin cross-linkage in the axon may not only occur at the cortex, but as  
639 well at central longitudinal actin trails (Fig.1; Leterrier et al., 2017), thus further contributing to  
640 the intricate cross-linking networks expected to stabilise MT bundles. Deciphering MT bundle  
641 cross-linkage, internally or with the axonal surface, stays a major challenge for future  
642 experimentation that will teach us important lessons about axon biology and pathology.

643

#### 644 Conclusions and future perspectives

645 Here we have presented a conceptual view by describing a functional interactome that  
646 integrates the enormous complexity of cross-regulatory networks acting at the local level in  
647 axons. We propose that there has to be a fine balance between damaging effects inflicted by  
648 life-sustaining motor movements ('associated', 'A-E' in Fig.3) and the activities that maintain the  
649 highways required for this movement (MT-'taming' mechanisms; '1-15' in Fig.3); both are fine-  
650 tuned through a number of cross-regulatory mechanisms ('a-e' in Fig.3).

651 Our model integrates a broad range of findings from the literature, but its original foundations  
652 are derived from our own work in *Drosophila* neurons as one consistent cellular system. Like  
653 other genetic invertebrate models, *Drosophila* provides a cost-effective and fast system to  
654 unravel the functional overlap and interface of different genetic factors - ideal to dissect complex  
655 machinery and deliver data that then often apply to axons of higher animals (Beaven et al.,  
656 2015; Prokop, 2018; Prokop et al., 2013).

657 This strategy offers one feasible strategy towards solving the daunting task of disentangling the  
658 enormous complexity of axonal MT bundle regulation. For this, the model of local axon  
659 homeostasis could provide a useful basis, helping to develop testable working hypotheses; a  
660 good starting point might be to break down the local axon homeostasis machinery into  
661 classifiable sub-machineries, like those discussed in the different sections of this review.

662 This approach also means that the discovery of new molecular mechanisms should no longer  
663 be the only gold standard for axon research, but we need to recognise the value of long-term  
664 approaches that gradually assemble known and newly discovered molecular mechanisms into  
665 an integrated understanding of how regulation at the cellular level can be orchestrated. In our  
666 opinion, this would be a much needed strategy shift, providing understanding of axons at the  
667 organisational level at which axonopathies become manifest. As B.A. Cohen put it: "Research  
668 that results in models that reliably and quantitatively predict the outcomes of genetic,  
669 biochemical, or pharmacological perturbations should be valued highly, and rewarded,  
670 regardless of whether such models invoke novel phenomena" (Cohen, 2017).

671 For the studies of MTs in neurons, we need to take into consideration that knowledge derived  
672 from non-neuronal cells might not apply (Beaven et al., 2015). Furthermore, the interactome  
673 shown in Fig.3 makes clear that we will need quantitative approaches: we know increasingly  
674 well how factors bind to MTs and partly understand how they might compete with each other.  
675 But how crowded can a single MT be, how many molecules are there in its surrounding at any

676 time point, and how much dynamic exchange is taking place? Computational modelling will be  
677 an unavoidable means to make sense of existing data and make reasonable predictions to  
678 inform experimentation (Cohen, 2004; Gunawardena, 2014).

679 Integrated understanding of axon biology will also improve our knowledge of the next higher  
680 level of complexity, i.e. the mechanisms that orchestrate axon homeostasis and that maintain  
681 balance even during phases of change (e.g. when switching from growth to differentiation, or  
682 during stress, injury, regeneration) - or that tip the balance and induce degeneration. Obviously,  
683 signalling networks or dynamic changes of systemic factors such as second messengers or the  
684 'tubulin code' will be key players to this end (Baas et al., 2016; Park and Roll-Mecak, 2018;  
685 Schelski and Bradke, 2017; Wilson and Gonzalez-Billault, 2015) - and glial cells will likely act as  
686 important external influencers of such processes (Pan and Chan, 2017).

687 Finally, MTs have been recognised as promising therapeutic targets (Baas and Ahmad, 2013;  
688 Eira et al., 2016; Zempel and Mandelkow, 2015), and urgently needed advance on this  
689 translational path will be facilitated by a better understanding of the axonal MT homeostasis  
690 system. A larger focus of the research community on MTs, and generation of more and relevant  
691 data that can be incorporated into our understanding, would be a key prerequisite to make such  
692 progress.

693

## 694 Acknowledgements

695 Work underpinning this article was made possible through support by the BBSRC to A.P  
696 (BB/I002448/1, BB/P020151/1, BB/L000717/1, BB/M007553/1), by parents to Y.-T.L., by the  
697 Leverhulme Trust to I.H. (ECF-2017-247). The Manchester Bioimaging Facility microscopes  
698 used in this study were purchased with grants from the BBSRC, The Wellcome Trust and The  
699 University of Manchester Strategic Fund. The Fly Facility has been supported by funds from  
700 The University of Manchester and the Wellcome Trust (087742/Z/08/Z). We thank Anthony  
701 Brown for introducing A.P. to the arguments that support a role of intermediate filaments in axon  
702 diameter, Anna Akhmanova for constructive and helpful feedback that has hopefully been well  
703 addressed in our last version, and Kyle Miller for major contributions to the contents of Box 4.

704

## 705 References

- 706 Abdul-Majid, K. B., Jirholt, J., Stadelmann, C., Stefferl, A., Kjellen, P., Wallstrom, E., Holmdahl, R.,  
707 Lassmann, H., Olsson, T., Harris, R. A. (2000). Screening of several H-2 congenic mouse strains  
708 identified H-2(q) mice as highly susceptible to MOG-induced EAE with minimal adjuvant requirement.  
709 *J Neuroimmunol* 111, 23-33 -- <http://www.ncbi.nlm.nih.gov/pubmed/11063818>
- 710 Acebes, A., Ferrus, A. (2000). Cellular and molecular features of axon collaterals and dendrites. *Trends*  
711 *Neurosci* 23, 557-65 -- <http://www.ncbi.nlm.nih.gov/pubmed/11074265>
- 712 Adalbert, R., Coleman, M. P. (2012). Axon pathology in age-related neurodegenerative disorders.  
713 *Neuropathol Appl Neurobiol* 39, 90-108 -- <http://www.ncbi.nlm.nih.gov/pubmed/23046254>
- 714 Adalbert, R., Nogradi, A., Babetto, E., Janeckova, L., Walker, S. A., Kerschensteiner, M., Misgeld, T.,  
715 Coleman, M. P. (2009). Severely dystrophic axons at amyloid plaques remain continuous and  
716 connected to viable cell bodies. *Brain* 132, 402-16 -- <http://www.ncbi.nlm.nih.gov/pubmed/19059977>
- 717 Aguzzi, A. (2019). 'Forward genetics' and the causes of ALS. *Nature Reviews Molecular Cell Biology* 20,  
718 67-67 -- <https://doi.org/10.1038/s41580-018-0062-6>
- 719 Ahmad, F. J., He, Y., Myers, K. A., Hasaka, T. P., Francis, F., Black, M. M., Baas, P. W. (2006). Effects of  
720 dynactin disruption and dynein depletion on axonal microtubules. *Traffic* 7, 524-37 --  
721 [http://www.ncbi.nlm.nih.gov/entrez/query.fcgi?cmd=Retrieve&db=PubMed&dopt=Citation&list\\_uids=16643276](http://www.ncbi.nlm.nih.gov/entrez/query.fcgi?cmd=Retrieve&db=PubMed&dopt=Citation&list_uids=16643276)
- 722
- 723 Ahmad, F. J., Hughey, J., Wittmann, T., Hyman, A., Greaser, M., Baas, P. W. (2000). Motor proteins

- 724 regulate force interactions between microtubules and microfilaments in the axon. *Nat Cell Biol* 2, 276-  
725 80 -- <http://www.ncbi.nlm.nih.gov/pubmed/10806478>
- 726 Ahmad, F. J., Yu, W., McNally, F. J., Baas, P. W. (1999). An essential role for katanin in severing  
727 microtubules in the neuron. *J Cell Biol* 145, 305-15 --  
728 [http://www.ncbi.nlm.nih.gov/entrez/query.fcgi?cmd=Retrieve&db=PubMed&dopt=Citation&list\\_uids=10](http://www.ncbi.nlm.nih.gov/entrez/query.fcgi?cmd=Retrieve&db=PubMed&dopt=Citation&list_uids=10209026)  
729 [209026](http://www.ncbi.nlm.nih.gov/entrez/query.fcgi?cmd=Retrieve&db=PubMed&dopt=Citation&list_uids=10209026)
- 730 Akhmanova, A. (2018). Strengthening Microtubules by Cuts that Heal. *Dev Cell* 47, 400-401 --  
731 <http://www.sciencedirect.com/science/article/pii/S1534580718309201>
- 732 Al-Bassam, J. (2017). Revisiting the tubulin cofactors and Arl2 in the regulation of soluble  $\alpha\beta$ -tubulin  
733 pools and their effect on microtubule dynamics. *Mol Biol Cell* 28, 359-363 --  
734 <http://www.molbiolcell.org/content/28/3/359.abstract>
- 735 Alberti, S., Hyman, A. A. (2016). Are aberrant phase transitions a driver of cellular aging? *BioEssays* 38,  
736 959-968 -- <https://www.ncbi.nlm.nih.gov/pubmed/27554449>
- 737 Allan, V. J. (2011). Cytoplasmic dynein. *Biochem Soc Trans* 39, 1169-78 --  
738 <http://www.ncbi.nlm.nih.gov/pubmed/21936784>
- 739 Allen, M. J., Godenschwege, T. A., Tanouye, M. A., Phelan, P. (2006). Making an escape: development  
740 and function of the *Drosophila* giant fibre system. *Semin Cell Dev Biol* 17, 31-41 --  
741 [http://www.ncbi.nlm.nih.gov/entrez/query.fcgi?cmd=Retrieve&db=PubMed&dopt=Citation&list\\_uids=16](http://www.ncbi.nlm.nih.gov/entrez/query.fcgi?cmd=Retrieve&db=PubMed&dopt=Citation&list_uids=16378740)  
742 [378740](http://www.ncbi.nlm.nih.gov/entrez/query.fcgi?cmd=Retrieve&db=PubMed&dopt=Citation&list_uids=16378740)
- 743 Allison, R., Edgar, J. R., Pearson, G., Rizo, T., Newton, T., Gunther, S., Berner, F., Hague, J., Connell, J.  
744 W., Winkler, J., Lippincott-Schwartz, J., Beetz, C., Winner, B., Reid, E. (2017). Defects in ER-  
745 endosome contacts impact lysosome function in hereditary spastic paraplegia. *J Cell Biol* 216, 1337-  
746 1355 -- <http://www.ncbi.nlm.nih.gov/pubmed/28389476>
- 747 Alushin, G. M., Lander, G. C., Kellogg, E. H., Zhang, R., Baker, D., Nogales, E. (2014). High-resolution  
748 microtubule structures reveal the structural transitions in  $\alpha\beta$ -tubulin upon GTP hydrolysis. *Cell*  
749 157, 1117-29 -- <http://www.ncbi.nlm.nih.gov/pubmed/24855948>
- 750 Alves-Silva, J., Sánchez-Soriano, N., Beaven, R., Klein, M., Parkin, J., Millard, T., Bellen, H., Venken, K.  
751 J. T., Ballestrem, C., Kammerer, R. A., Prokop, A. (2012). Spectraplakins promote microtubule-  
752 mediated axonal growth by functioning as structural microtubule-associated proteins and EB1-  
753 dependent +TIPs (Tip Interacting Proteins). *J. Neurosci* 32, 9143-58 --  
754 <http://www.jneurosci.org/content/32/27/9143.full>
- 755 Amos, L., Amos, W. (1991). The bending of sliding microtubules imaged by confocal light microscopy and  
756 negative stain electron microscopy. *J Cell Sci* 1991, 95-101 --  
757 [http://jcs.biologists.org/content/joces/1991/Supplement\\_14/95.full.pdf](http://jcs.biologists.org/content/joces/1991/Supplement_14/95.full.pdf)
- 758 Amos, L. A., Löwe, J. (1999). How taxol stabilises microtubule structure. *Chem Biol* 6, R65-9 --  
759 <http://www.ncbi.nlm.nih.gov/pubmed/10074470>
- 760 Appert-Rolland, C., Ebbinghaus, M., Santen, L. (2015). Intracellular transport driven by cytoskeletal  
761 motors: General mechanisms and defects. *Physics Reports* 593, 1-59 --  
762 <http://www.sciencedirect.com/science/article/pii/S037015731500335X>
- 763 Arnal, I., Wade, R. H. (1995). How does taxol stabilize microtubules? *Curr Biol* 5, 900-8 --  
764 <http://www.ncbi.nlm.nih.gov/pubmed/7583148>
- 765 Baas, P. W. (1999). Microtubules and neuronal polarity: lessons from mitosis. *Neuron* 22, 23-31 --  
766 <https://www.ncbi.nlm.nih.gov/pubmed/10027286>
- 767 Baas, P. W., Ahmad, F. J. (2013). Beyond taxol: microtubule-based treatment of disease and injury of the  
768 nervous system. *Brain* -- <http://www.ncbi.nlm.nih.gov/pubmed/23811322>
- 769 Baas, P. W., Rao, A. N., Matamoros, A. J., Leo, L. (2016). Stability properties of neuronal microtubules.  
770 *Cytoskeleton (Hoboken)* 73, 442-60 -- <http://www.ncbi.nlm.nih.gov/pubmed/26887570>
- 771 Bailey, M. E., Sackett, D. L., Ross, J. L. (2015). Katanin Severing and Binding Microtubules Are Inhibited  
772 by Tubulin Carboxy Tails. *Biophys J* 109, 2546-61 --  
773 <https://www.ncbi.nlm.nih.gov/pmc/articles/PMC4699919/?otool=igbumllib>
- 774 Baker, D., O'Neill, J. K., Gschmeissner, S. E., Wilcox, C. E., Butter, C., Turk, J. L. (1990). Induction of  
775 chronic relapsing experimental allergic encephalomyelitis in Biozzi mice. *J Neuroimmunol* 28, 261-70 -  
776 <http://www.ncbi.nlm.nih.gov/pubmed/2373763>
- 777 Balabanian, L., Berger, C. L., Hendricks, A. G. (2017). Acetylated microtubules are preferentially bundled  
778 leading to enhanced kinesin-1 motility. *Biophys J* 113, 1551-1560 --  
779 <http://www.sciencedirect.com/science/article/pii/S0006349517308664>

- 780 Beaven, R., Dzhindzhev, N. S., Qu, Y., Hahn, I., Dajas-Bailador, F., Ohkura, H., Prokop, A. (2015).  
781 *Drosophila* CLIP-190 and mammalian CLIP-170 display reduced microtubule plus end association in  
782 the nervous system. *Mol Biol Cell* 26, 1491-1508 --  
783 <http://www.molbiolcell.org/content/26/8/1491.abstract>
- 784 Bechstedt, S., Lu, K., Brouhard, Gary J. (2014). Doublecortin recognizes the longitudinal curvature of the  
785 microtubule end and lattice. *Curr Biol* 24, 2366-2375 --  
786 <http://www.sciencedirect.com/science/article/pii/S0960982214010525>
- 787 Bellen, H. J., Tong, C., Tsuda, H. (2010). 100 years of *Drosophila* research and its impact on vertebrate  
788 neuroscience: a history lesson for the future. *Nat Rev Neurosci* 11, 514-522 --  
789 [http://www.ncbi.nlm.nih.gov/entrez/query.fcgi?cmd=Retrieve&db=PubMed&dopt=Citation&list\\_uids=20383202](http://www.ncbi.nlm.nih.gov/entrez/query.fcgi?cmd=Retrieve&db=PubMed&dopt=Citation&list_uids=20383202)
- 790
- 791 Belonogov, L., Bailey, M. E., Tyler, M. A., Kazemi, A., Ross, J. L. (2019). Katanin catalyzes microtubule  
792 depolymerization independently of tubulin C-terminal tails. *Cytoskeleton (Hoboken)* --  
793 <http://www.ncbi.nlm.nih.gov/pubmed/30980604>
- 794 Benshalom, G., Reese, T. S. (1985). Ultrastructural observations on the cytoarchitecture of axons  
795 processed by rapid-freezing and freeze-substitution. *J Neurocytol* 14, 943-60 --  
796 <http://www.ncbi.nlm.nih.gov/pubmed/2420942>
- 797 Berg, J. M., Tymoczko, J. L., Stryer, L. (2002). "Biochemistry (5th edition)." W H Freeman, New York
- 798 Bernier, G., Kothary, R. (1998). Prenatal onset of axonopathy in Dystonia musculorum mice. *Dev Genet*  
799 22, 160-8 --  
800 [http://www.ncbi.nlm.nih.gov/entrez/query.fcgi?cmd=Retrieve&db=PubMed&dopt=Citation&list\\_uids=9581287](http://www.ncbi.nlm.nih.gov/entrez/query.fcgi?cmd=Retrieve&db=PubMed&dopt=Citation&list_uids=9581287)
- 801
- 802 Bettencourt da Cruz, A., Schwarzel, M., Schulze, S., Niyiyati, M., Heisenberg, M., Kretschmar, D. (2005).  
803 Disruption of the MAP1B-related protein FUTSCH leads to changes in the neuronal cytoskeleton,  
804 axonal transport defects, and progressive neurodegeneration in *Drosophila*. *Mol Biol Cell* 16, 2433-42  
805 --  
806 [http://www.ncbi.nlm.nih.gov/entrez/query.fcgi?cmd=Retrieve&db=PubMed&dopt=Citation&list\\_uids=15772149](http://www.ncbi.nlm.nih.gov/entrez/query.fcgi?cmd=Retrieve&db=PubMed&dopt=Citation&list_uids=15772149)
- 807
- 808 Bichenback, J. (2013). "International perspectives on spinal cord injury." WHO, ISCOS, Switzerland
- 809 Biswas, S., Kalil, K. (2018). The microtubule-associated protein tau mediates the organization of  
810 microtubules and their dynamic exploration of actin-rich lamellipodia and filopodia of cortical growth  
811 cones. *J Neurosci* 38, 291-307 -- <http://www.ncbi.nlm.nih.gov/pubmed/29167405>
- 812 Blackstone, C. (2018). Hereditary spastic paraplegia. *Handb Clin Neurol* 148, 633-652 --  
813 <http://www.ncbi.nlm.nih.gov/pubmed/29478605>
- 814 Blackstone, C., O'Kane, C. J., Reid, E. (2011). Hereditary spastic paraplegias: membrane traffic and the  
815 motor pathway. *Nat Rev Neurosci* 12, 31-42 -- <http://www.ncbi.nlm.nih.gov/pubmed/21139634>
- 816 Blanchoin, L., Michelot, A. (2012). Actin Cytoskeleton: A Team Effort during Actin Assembly. *Curr Biol* 22,  
817 R643-5 -- <http://www.ncbi.nlm.nih.gov/pubmed/22917514>
- 818 Bodaleo, F. J., Gonzalez-Billault, C. (2016). The presynaptic microtubule cytoskeleton in physiological  
819 and pathological conditions: lessons from *Drosophila* Fragile X Syndrome and Hereditary Spastic  
820 Paraplegias. *Frontiers in Molecular Neuroscience* 9, 60-60 --  
821 <https://www.ncbi.nlm.nih.gov/pubmed/27504085>
- 822 Bogoyevitch, M. A., Fairlie, D. P. (2007). A new paradigm for protein kinase inhibition: blocking  
823 phosphorylation without directly targeting ATP binding. *Drug Discov Today* 12, 622-33 --  
824 <http://www.ncbi.nlm.nih.gov/pubmed/17706543>
- 825 Bottenberg, W., Sánchez-Soriano, N., Alves-Silva, J., Hahn, I., Mende, M., Prokop, A. (2009). Context-  
826 specific requirements of functional domains of the Spectraplaklin Short stop *in vivo*. *Mech Dev* 126,  
827 489-502 --  
828 [http://www.ncbi.nlm.nih.gov/entrez/query.fcgi?cmd=Retrieve&db=PubMed&dopt=Citation&list\\_uids=19409984](http://www.ncbi.nlm.nih.gov/entrez/query.fcgi?cmd=Retrieve&db=PubMed&dopt=Citation&list_uids=19409984)
- 829
- 830 Bradke, F., Fawcett, J. W., Spira, M. E. (2012). Assembly of a new growth cone after axotomy: the  
831 precursor to axon regeneration. *Nat Rev Neurosci* 13, 183-93 --  
832 <http://www.ncbi.nlm.nih.gov/pubmed/22334213>
- 833 Brandt, R. (1998). Cytoskeletal mechanisms of axon outgrowth and pathfinding. *Cell Tissue Res*. 292,  
834 181-189 -- <https://link-springer-com.manchester.idm.oclc.org/article/10.1007%2Fs004410051049>
- 835 Brandt, R., Bakota, L. (2017). Microtubule dynamics and the neurodegenerative triad of Alzheimer's  
836 disease: The hidden connection. *J Neurochem* 173, 409-17 -- <http://dx.doi.org/10.1111/jnc.14011>

- 837 Brandt, R., Leger, J., Lee, G. (1995). Interaction of tau with the neural plasma membrane mediated by  
838 tau's amino-terminal projection domain. *J Cell Biol* 131, 1327-40 --  
839 <http://www.ncbi.nlm.nih.gov/pubmed/8522593>
- 840 Bray, D. (1984). Axonal growth in response to experimentally applied mechanical tension. *Dev Biol* 102,  
841 379-89. -- [https://doi.org/10.1016/0012-1606\(84\)90202-1](https://doi.org/10.1016/0012-1606(84)90202-1)
- 842 Brouhard, G. J., Rice, L. M. (2018). Microtubule dynamics: an interplay of biochemistry and mechanics.  
843 *Nat Rev Mol Cell Biol* -- <https://doi.org/10.1038/s41580-018-0009-y>
- 844 Brunden, K. R., Trojanowski, J. Q., Smith, A. B., 3rd, Lee, V. M., Ballatore, C. (2014). Microtubule-  
845 stabilizing agents as potential therapeutics for neurodegenerative disease. *Bioorg Med Chem* 22,  
846 5040-9 -- <http://www.ncbi.nlm.nih.gov/pubmed/24433963>
- 847 Bucci, C., Bakke, O., Progida, C. (2012). Charcot-Marie-Tooth disease and intracellular traffic. *Prog*  
848 *Neurobiol* 99, 191-225 -- <http://www.ncbi.nlm.nih.gov/pubmed/22465036>
- 849 Buckminster Fuller, R. (1961). Tensegrity. *Portfolio and Art News Annual* 4, 112-127, 144, 148 --  
850 <http://www.rwgrayprojects.com/rbfnote/fpapers/tensegrity/tenseg01.html>
- 851 Burton, P. R., Hinkley, R. E., Pierson, G. B. (1975). Tannic acid-stained microtubules with 12, 13, and 15  
852 protofilaments. *J Cell Biol* 65, 227-33 -- <http://www.ncbi.nlm.nih.gov/pubmed/47861>
- 853 Butler, R., Wood, J. D., Landers, J. A., Cunliffe, V. T. (2010). Genetic and chemical modulation of spastin-  
854 dependent axon outgrowth in zebrafish embryos indicates a role for impaired microtubule dynamics in  
855 hereditary spastic paraplegia. *Dis Model Mech* 3, 743-51 -- <http://dmm.biologists.org/content/3/11-12/743.long>  
856
- 857 Buxbaum, R. E., Heidemann, S. R. (1988). A thermodynamic model for force integration and microtubule  
858 assembly during axonal elongation. *J Theor Biol* 134, 379-90 --  
859 <http://www.ncbi.nlm.nih.gov/pubmed/3254435>
- 860 Buxbaum, R. E., Heidemann, S. R. (1992). An absolute rate theory model for tension control of axonal  
861 elongation. *J Theor Biol* 155, 409-26 -- <http://www.ncbi.nlm.nih.gov/pubmed/1619959>
- 862 Cabrales Fontela, Y., Kadavath, H., Biernat, J., Riedel, D., Mandelkow, E., Zweckstetter, M. (2017).  
863 Multivalent cross-linking of actin filaments and microtubules through the microtubule-associated  
864 protein Tau. *Nature Communications* 8, 1981 -- <https://doi.org/10.1038/s41467-017-02230-8>
- 865 Calkins, D. J. (2013). Age-Related Changes in the Visual Pathways: Blame It on the AxonAge-Related  
866 Changes in the Visual Pathways. *Invest Ophthalmol Vis Sci* 54, ORSF 37-41 --  
867 <https://dx.doi.org/10.1167/iov.13-12784>
- 868 Case, L. B., Waterman, C. M. (2015). Integration of actin dynamics and cell adhesion by a three-  
869 dimensional, mechanosensitive molecular clutch. *Nat Cell Biol* --  
870 <http://www.ncbi.nlm.nih.gov/pubmed/26121555>
- 871 Castle, B. T., McCubbin, S., Prahl, L. S., Bernens, J. N., Sept, D., Odde, D. J. (2017). Mechanisms of  
872 kinetic stabilization by the drugs paclitaxel and vinblastine. *Mol Biol Cell* 28, 1238-1257 --  
873 <https://www.molbiolcell.org/doi/abs/10.1091/mbc.e16-08-0567>
- 874 Chaaban, S., Brouhard, G. J. (2017). A microtubule bestiary: structural diversity in tubulin polymers. *Mol*  
875 *Biol Cell* 28, 2924-2931 -- <http://www.molbiolcell.org/content/28/22/2924.abstract>
- 876 Chalfie, M., Thomson, J. N. (1982). Structural and functional diversity in the neuronal microtubules of  
877 *Caenorhabditis elegans*. *J Cell Biol* 93, 15-23 -- <http://www.ncbi.nlm.nih.gov/pubmed/7068753>
- 878 Chan, C. E., Odde, D. J. (2008). Traction dynamics of filopodia on compliant substrates. *Science* 322,  
879 1687-91 -- <http://www.ncbi.nlm.nih.gov/pubmed/19074349>
- 880 Chapin, S. J., Bulinski, J. C., Gundersen, G. G. (1991). Microtubule bundling in cells. *Nature* 349, 24 --  
881 [http://www.ncbi.nlm.nih.gov/entrez/query.fcgi?cmd=Retrieve&db=PubMed&dopt=Citation&list\\_uids=1670738](http://www.ncbi.nlm.nih.gov/entrez/query.fcgi?cmd=Retrieve&db=PubMed&dopt=Citation&list_uids=1670738)  
882
- 883 Chen, Y., Hancock, W. O. (2015). Kinesin-5 is a microtubule polymerase. *Nat Commun* 6, 8160 --  
884 <http://www.ncbi.nlm.nih.gov/pubmed/26437877>
- 885 Chrétien, D., Fuller, S. D. (2000). Microtubules switch occasionally into unfavorable configurations during  
886 elongation. *J Mol Biol* 298, 663-76 -- <http://www.ncbi.nlm.nih.gov/pubmed/10788328>
- 887 Chrétien, D., Kenney, J. M., Fuller, S. D., Wade, R. H. (1996). Determination of microtubule polarity by  
888 cryo-electron microscopy. *Structure* 4, 1031-40 -- <http://www.ncbi.nlm.nih.gov/pubmed/8805589>
- 889 Chrétien, D., Wade, R. H. (1991). New data on the microtubule surface lattice. *Biol Cell* 71, 161-74 --  
890 <http://www.ncbi.nlm.nih.gov/pubmed/1912942>
- 891 Chung, P. J., Song, C., Deek, J., Miller, H. P., Li, Y., Choi, M. C., Wilson, L., Feinstein, S. C., Safinya, C.

- 892 R. (2016). Tau mediates microtubule bundle architectures mimicking fascicles of microtubules found in  
893 the axon initial segment. *Nat Commun* 7, 12278 -- <http://dx.doi.org/10.1038/ncomms12278>
- 894 Cioni, J. M., Koppers, M., Holt, C. E. (2018). Molecular control of local translation in axon development  
895 and maintenance. *Curr Opin Neurobiol* 51, 86-94 -- <http://www.ncbi.nlm.nih.gov/pubmed/29549711>
- 896 Cohen, B. A. (2017). How should novelty be valued in science? *Elife* 6, e28699 --  
897 <https://doi.org/10.7554/eLife.28699>
- 898 Cohen, J. E. (2004). Mathematics is biology's next microscope, only better; biology is mathematics' next  
899 physics, only better. *PLoS Biol* 2, e439 -- <http://www.ncbi.nlm.nih.gov/pubmed/15597117>
- 900 Court, F. A., Midha, R., Cisterna, B. A., Grochmal, J., Shakhbazau, A., Hendriks, W. T., Van Minnen, J.  
901 (2011). Morphological evidence for a transport of ribosomes from Schwann cells to regenerating  
902 axons. *Glia* 59, 1529-1539 -- <https://onlinelibrary.wiley.com/doi/abs/10.1002/glia.21196>
- 903 Crenshaw, J. D., Liang, T., Hess, H., Phillipot, S. R. (2011). A cellular automation approach to the  
904 simulation of active self-assembly of kinesin-powered molecular shuttles. *J Comp Theoret Nanosci* 8,  
905 1999-2005 -- <https://doi-org.manchester.idm.oclc.org/10.1166/jctn.2011.1916>
- 906 Cross, R. A. (2019). Microtubule lattice plasticity. *Curr Opin Cell Biol* 56, 88-93 --  
907 <http://www.sciencedirect.com/science/article/pii/S0955067418301418>
- 908 Dalpe, G., Leclerc, N., Vallee, A., Messer, A., Mathieu, M., De Repentigny, Y., Kothary, R. (1998).  
909 Dystonin is essential for maintaining neuronal cytoskeleton organization. *Mol Cell Neurosci* 10, 243-57  
910 --  
911 [http://www.ncbi.nlm.nih.gov/entrez/query.fcgi?cmd=Retrieve&db=PubMed&dopt=Citation&list\\_uids=9604204](http://www.ncbi.nlm.nih.gov/entrez/query.fcgi?cmd=Retrieve&db=PubMed&dopt=Citation&list_uids=9604204)  
912
- 913 Datar, A., Ameeramja, J., Bhat, A., Srivastava, R., Bernal, R., Prost, J., Callan-Jones, A., Pullarkat, P. A.  
914 (2019). The roles of microtubules and membrane tension in axonal beading, retraction, and atrophy.  
915 *bioRxiv*, 10.1101/575258 -- <https://www.biorxiv.org/content/biorxiv/early/2019/03/12/575258.full>
- 916 Davis, L. J., Odde, D. J., Block, S. M., Gross, S. P. (2002). The importance of lattice defects in katanin-  
917 mediated microtubule severing *in vitro*. *Biophysical Journal* 82, 2916-2927 --  
918 [https://doi.org/10.1016/S0006-3495\(02\)75632-4](https://doi.org/10.1016/S0006-3495(02)75632-4)
- 919 de Rooij, R., Kuhl, E. (2018). Microtubule polymerization and cross-link dynamics explain axonal stiffness  
920 and damage. *Biophys J* 114, 201-212 --  
921 <https://www.sciencedirect.com/science/article/pii/S0006349517312390>
- 922 de Rooij, R., Kuhl, E., Miller, K. E. (2018). Modeling the axon as an active partner with the growth cone in  
923 axonal elongation. *Biophys J* 115, 1783-1795 -- <http://www.ncbi.nlm.nih.gov/pubmed/30309611>
- 924 DeBonis, S., Neumann, E., Skoufias, D. A. (2015). Self protein-protein interactions are involved in  
925 TPPP/p25 mediated microtubule bundling. *Sci Rep* 5, 13242 --  
926 <http://www.ncbi.nlm.nih.gov/pubmed/26289831>
- 927 Dennerll, T. J., Joshi, H. C., Steel, V. L., Buxbaum, R. E., Heidemann, S. R. (1988). Tension and  
928 compression in the cytoskeleton of PC-12 neurites. II: Quantitative measurements. *J Cell Biol* 107,  
929 665-74 -- <http://www.ncbi.nlm.nih.gov/pubmed/3417767>
- 930 Dent, E. W., Gupton, S. L., Gertler, F. B. (2011). The growth cone cytoskeleton in axon outgrowth and  
931 guidance. *Cold Spring Harb Perspect Biol* 3, a001800 --  
932 [http://www.ncbi.nlm.nih.gov/entrez/query.fcgi?cmd=Retrieve&db=PubMed&dopt=Citation&list\\_uids=21106647](http://www.ncbi.nlm.nih.gov/entrez/query.fcgi?cmd=Retrieve&db=PubMed&dopt=Citation&list_uids=21106647)  
933
- 934 Dent, E. W., Kalil, K. (2001). Axon branching requires interactions between dynamic microtubules and  
935 actin filaments. *J Neurosci* 21, 9757-69 --  
936 <http://www.jneurosci.org.manchester.idm.oclc.org/content/21/24/9757.long>
- 937 Denton, K. R., Lei, L., Grenier, J., Rodionov, V., Blackstone, C., Li, X. J. (2014). Loss of spastin function  
938 results in disease-specific axonal defects in human pluripotent stem cell-based models of hereditary  
939 spastic paraplegia. *Stem Cells* 32, 414-23 -- <http://www.ncbi.nlm.nih.gov/pubmed/24123785>
- 940 Diaz-Valencia, J. D., Morelli, M. M., Bailey, M., Zhang, D., Sharp, D. J., Ross, J. L. (2011). *Drosophila*  
941 katanin-60 depolymerizes and severs at microtubule defects. *Biophys J* 100, 2440-9 --  
942 <http://www.ncbi.nlm.nih.gov/pubmed/21575578>
- 943 Dong, Z., Wu, S., Zhu, C., Wang, X., Li, Y., Chen, X., Liu, D., Qiang, L., Baas, P. W., Liu, M. (2019).  
944 Clustered Regularly Interspaced Short Palindromic Repeats (CRISPR)/Cas9-mediated kif15 mutations  
945 accelerate axonal outgrowth during neuronal development and regeneration in zebrafish. *Traffic* 20,  
946 71-81 -- <http://www.ncbi.nlm.nih.gov/pubmed/30411440>
- 947 Dumont, E., L. P., Do, C., Hess, H. (2015). Molecular wear of microtubules propelled by surface-adhered

- 948 kinesins. *Nat Nano* 10, 166-169 -- <http://dx.doi.org/10.1038/nnano.2014.334>
- 949 Edvardson, S., Cinnamon, Y., Jalas, C., Shaag, A., Maayan, C., Axelrod, F. B., Elpeleg, O. (2012).  
950 Hereditary sensory autonomic neuropathy caused by a mutation in dystonin. *Ann Neurol* 71, 569-72 --  
951 <http://www.ncbi.nlm.nih.gov/pubmed/22522446>
- 952 Eira, J., Silva, C. S., Sousa, M. M., Liz, M. A. (2016). The cytoskeleton as a novel therapeutic target for  
953 old neurodegenerative disorders. *Progress in Neurobiology* --  
954 <http://www.sciencedirect.com/science/article/pii/S0301008215300800>
- 955 Elden, A. C., Kim, H.-J., Hart, M. P., Chen-Plotkin, A. S., Johnson, B. S., Fang, X., Armakola, M., Geser,  
956 F., Greene, R., Lu, M. M., Padmanabhan, A., Clay-Falcone, D., McCluskey, L., Elman, L., Juhr, D.,  
957 Gruber, P. J., Rüb, U., Auburger, G., Trojanowski, J. Q., Lee, V. M. Y., Van Deerlin, V. M., Bonini, N.  
958 M., Gitler, A. D. (2010). Ataxin-2 intermediate-length polyglutamine expansions are associated with  
959 increased risk for ALS. *Nature* 466, 1069 -- <https://doi.org/10.1038/nature09320>
- 960 Elie, A., Prezel, E., Guerin, C., Denarier, E., Ramirez-Rios, S., Serre, L., Andrieux, A., Fourest-Lieuvain,  
961 A., Blanchoin, L., Arnal, I. (2015). Tau co-organizes dynamic microtubule and actin networks. *Sci Rep*  
962 5, 9964 -- <http://www.ncbi.nlm.nih.gov/pubmed/25944224>
- 963 Ettinger, A., van Haren, J., Ribeiro, S. A., Wittmann, T. (2016). Doublecortin is excluded from growing  
964 microtubule ends and recognizes the GDP-microtubule lattice. *Curr Biol* 26, 1549-1555 --  
965 <http://www.ncbi.nlm.nih.gov/pubmed/27238282>
- 966 Eyer, J., Cleveland, D. W., Wong, P. C., Peterson, A. C. (1998). Pathogenesis of two axonopathies does  
967 not require axonal neurofilaments. *Nature* 391, 584-7 --  
968 [http://www.ncbi.nlm.nih.gov/entrez/query.fcgi?cmd=Retrieve&db=PubMed&dopt=Citation&list\\_uids=94](http://www.ncbi.nlm.nih.gov/entrez/query.fcgi?cmd=Retrieve&db=PubMed&dopt=Citation&list_uids=9468135)  
969 [68135](http://www.ncbi.nlm.nih.gov/entrez/query.fcgi?cmd=Retrieve&db=PubMed&dopt=Citation&list_uids=9468135)
- 970 Eyer, J., Peterson, A. (1994). Neurofilament-deficient axons and perikaryal aggregates in viable  
971 transgenic mice expressing a neurofilament-beta-galactosidase fusion protein. *Neuron* 12, 389-405 --  
972 <http://www.ncbi.nlm.nih.gov/pubmed/8110465>
- 973 Fan, A., Tofangchi, A., Kandel, M., Popescu, G., Saif, T. (2017). Coupled circumferential and axial  
974 tension driven by actin and myosin influences in vivo axon diameter. *Sci Rep* 7, 14188 --  
975 <http://www.ncbi.nlm.nih.gov/pubmed/29079766>
- 976 Farah, C. A., Nguyen, M. D., Julien, J. P., Leclerc, N. (2003). Altered levels and distribution of  
977 microtubule-associated proteins before disease onset in a mouse model of amyotrophic lateral  
978 sclerosis. *J Neurochem* 84, 77-86 -- <http://www.ncbi.nlm.nih.gov/pubmed/12485403>
- 979 Fass, J. N., Odde, D. J. (2003). Tensile force-dependent neurite elicitation via anti-beta1 integrin  
980 antibody-coated magnetic beads. *Biophys J* 85, 623-36 --  
981 <http://www.ncbi.nlm.nih.gov/pubmed/12829516>
- 982 Fassier, C., Tarrade, A., Peris, L., Courageot, S., Mailly, P., Dalard, C., Delga, S., Roblot, N., Lefevre, J.,  
983 Job, D., Hazan, J., Curmi, P. A., Melki, J. (2013). Microtubule-targeting drugs rescue axonal swellings  
984 in cortical neurons from spastin knockout mice. *Dis Model Mech* 6, 72-83 --  
985 <http://www.ncbi.nlm.nih.gov/pubmed/22773755>
- 986 Ferrier, A., Boyer, J. G., Kothary, R. (2013). Cellular and molecular biology of neuronal Dystonin. *Int Rev*  
987 *Cell Mol Biol* 300, 85-120 -- <http://www.ncbi.nlm.nih.gov/pubmed/23273860>
- 988 Fiala, J. C., Feinberg, M., Peters, A., Barbas, H. (2007). Mitochondrial degeneration in dystrophic neurites  
989 of senile plaques may lead to extracellular deposition of fine filaments. *Brain Struct Funct* 212, 195-  
990 207 --  
991 [http://www.ncbi.nlm.nih.gov/entrez/query.fcgi?cmd=Retrieve&db=PubMed&dopt=Citation&list\\_uids=17](http://www.ncbi.nlm.nih.gov/entrez/query.fcgi?cmd=Retrieve&db=PubMed&dopt=Citation&list_uids=17717688)  
992 [717688](http://www.ncbi.nlm.nih.gov/entrez/query.fcgi?cmd=Retrieve&db=PubMed&dopt=Citation&list_uids=17717688)
- 993 Fletcher, D. A., Mullins, R. D. (2010). Cell mechanics and the cytoskeleton. *Nature* 463, 485-92 --  
994 <http://www.ncbi.nlm.nih.gov/pubmed/20110992>
- 995 Fransen, M., Lismont, C., Walton, P. (2017). The Peroxisome-Mitochondria Connection: How and Why?  
996 *Int J Mol Sci* 18 -- <http://www.ncbi.nlm.nih.gov/pubmed/28538669>
- 997 Franze, K., Gerdemann, J., Weick, M., Betz, T., Pawlizak, S., Lakadamyali, M., Bayer, J., Rillich, K.,  
998 Gogler, M., Lu, Y. B., Reichenbach, A., Janmey, P., Kas, J. (2009). Neurite branch retraction is  
999 caused by a threshold-dependent mechanical impact. *Biophys J* 97, 1883-90 --  
1000 <http://www.ncbi.nlm.nih.gov/pubmed/19804718>
- 1001 Friede, R. L., Samorajski, T. (1970). Axon caliber related to neurofilaments and microtubules in sciatic  
1002 nerve fibers of rats and mice. *Anat Rec* 167, 379-87 --  
1003 [http://www.ncbi.nlm.nih.gov/entrez/query.fcgi?cmd=Retrieve&db=PubMed&dopt=Citation&list\\_uids=54](http://www.ncbi.nlm.nih.gov/entrez/query.fcgi?cmd=Retrieve&db=PubMed&dopt=Citation&list_uids=5454590)  
1004 [54590](http://www.ncbi.nlm.nih.gov/entrez/query.fcgi?cmd=Retrieve&db=PubMed&dopt=Citation&list_uids=5454590)

- 1005 Fröhbeis, C., Fröhlich, D., Kuo, W. P., Amphornrat, J., Thilemann, S., Saab, A. S., Kirchhoff, F., Möbius,  
1006 W., Goebbels, S., Nave, K. A., Schneider, A., Simons, M., Klugmann, M., Trotter, J., Krämer-Albers, E.  
1007 M. (2013). Neurotransmitter-triggered transfer of exosomes mediates oligodendrocyte-neuron  
1008 communication. *PLoS Biol* 11, e1001604 -- <http://www.ncbi.nlm.nih.gov/pubmed/23874151>
- 1009 Gaetz, M. (2004). The neurophysiology of brain injury. *Clin Neurophysiol* 115, 4-18 --  
1010 <http://www.ncbi.nlm.nih.gov/pubmed/14706464>
- 1011 Gardner, M. K., Zanic, M., Gell, C., Bormuth, V., Howard, J. (2011). Depolymerizing kinesins Kip3 and  
1012 MCAK shape cellular microtubule architecture by differential control of catastrophe. *Cell* 147, 1092-  
1013 103 -- <http://www.ncbi.nlm.nih.gov/pubmed/22118464>
- 1014 Gasic, I., Mitchison, T. J. (2018). Autoregulation and repair in microtubule homeostasis. *Curr Opin Cell  
1015 Biol* 56, 80-87 -- <http://www.ncbi.nlm.nih.gov/pubmed/30415186>
- 1016 Geyer, E. A., Burns, A., Lalonde, B. A., Ye, X., Piedra, F.-A., Huffaker, T. C., Rice, L. M. (2015). A  
1017 mutation uncouples the tubulin conformational and GTPase cycles, revealing allosteric control of  
1018 microtubule dynamics. *Elife* 4, e10113 -- <https://doi.org/10.7554/eLife.10113>
- 1019 Giuditta, A., Eyman, M., Kaplan, B. B. (2002a). Gene expression in the squid giant axon: neurotransmitter  
1020 modulation of RNA transfer from periaxonal glia to the axon. *Biol Bull* 203, 189-90 --  
1021 <https://www.journals.uchicago.edu/doi/10.2307/1543389>
- 1022 Giuditta, A., Kaplan, B. B., van Minnen, J., Alvarez, J., Koenig, E. (2002b). Axonal and presynaptic  
1023 protein synthesis: new insights into the biology of the neuron. *Trends Neurosci* 25, 400-4 --  
1024 <http://www.ncbi.nlm.nih.gov/pubmed/12127756>
- 1025 Goldstein, A. Y., Wang, X., Schwarz, T. L. (2008). Axonal transport and the delivery of pre-synaptic  
1026 components. *Curr Opin Neurobiol* 18, 495-503 -- <http://www.ncbi.nlm.nih.gov/pubmed/18950710>
- 1027 Gonçalves-Pimentel, C., Gombos, R., Mihály, J., Sánchez-Soriano, N., Prokop, A. (2011). Dissecting  
1028 regulatory networks of filopodia formation in a *Drosophila* growth cone model. *PLoS ONE* 6, e18340 --  
1029 <http://www.plosone.org/article/info%3Adoi%2F10.1371%2Fjournal.pone.0018340>
- 1030 Gondre-Lewis, M. C., Park, J. J., Loh, Y. P. (2012). Cellular mechanisms for the biogenesis and transport  
1031 of synaptic and dense-core vesicles. *Int Rev Cell Mol Biol* 299, 27-115 --  
1032 <http://www.ncbi.nlm.nih.gov/pubmed/22959301>
- 1033 Gonzalez, C., Couve, A. (2014). The axonal endoplasmic reticulum and protein trafficking: Cellular  
1034 bootlegging south of the soma. *Semin Cell Dev Biol* 27, 23-31 --  
1035 <http://www.ncbi.nlm.nih.gov/pubmed/24361785>
- 1036 Goodwin, S. S., Vale, R. D. (2010). Patronin regulates the microtubule network by protecting microtubule  
1037 minus ends. *Cell* 143, 263-74 --  
1038 [http://www.ncbi.nlm.nih.gov/entrez/query.fcgi?cmd=Retrieve&db=PubMed&dopt=Citation&list\\_uids=20946984](http://www.ncbi.nlm.nih.gov/entrez/query.fcgi?cmd=Retrieve&db=PubMed&dopt=Citation&list_uids=20946984)  
1039
- 1040 Goriounov, D., Leung, C. L., Liem, R. K. (2003). Protein products of human Gas2-related genes on  
1041 chromosomes 17 and 22 (hGAR17 and hGAR22) associate with both microfilaments and  
1042 microtubules. *J Cell Sci* 116, 1045-58 --  
1043 [http://www.ncbi.nlm.nih.gov/entrez/query.fcgi?cmd=Retrieve&db=PubMed&dopt=Citation&list\\_uids=12584248](http://www.ncbi.nlm.nih.gov/entrez/query.fcgi?cmd=Retrieve&db=PubMed&dopt=Citation&list_uids=12584248)  
1044
- 1045 Gosselin, P., Mohrbach, H., Kulić, I. M., Ziebert, F. (2016). On complex, curved trajectories in microtubule  
1046 gliding. *Physica D: Nonlinear Phenomena* 318–319, 105-111 --  
1047 <http://www.sciencedirect.com/science/article/pii/S0167278915002183>
- 1048 Gu, C., Yaddanapudi, S., Weins, A., Osborn, T., Reiser, J., Pollak, M., Hartwig, J., Sever, S. (2010).  
1049 Direct dynamin–actin interactions regulate the actin cytoskeleton. *The EMBO Journal* 29, 3593-3606 --  
1050 <http://emboj.embopress.org/content/embojnl/29/21/3593.full.pdf>
- 1051 Gumy, L. F., Chew, D. J., Tortosa, E., Katrukha, E. A., Kapitein, L. C., Tolkovsky, A. M., Hoogenraad, C.  
1052 C., Fawcett, J. W. (2013). The kinesin-2 family member KIF3C regulates microtubule dynamics and is  
1053 required for axon growth and regeneration. *J Neurosci* 33, 11329-11345 --  
1054 <http://www.jneurosci.org/content/jneuro/33/28/11329.full.pdf>
- 1055 Gunawardena, J. (2014). Models in biology: 'accurate descriptions of our pathetic thinking'. *BMC Biology*  
1056 12, 29 -- <http://www.biomedcentral.com/1741-7007/12/29>
- 1057 Gupta, K. K., Alberico, E. O., Nathke, I. S., Goodson, H. V. (2014). Promoting microtubule assembly: A  
1058 hypothesis for the functional significance of the +TIP network. *Bioessays* 36, 818-26 --  
1059 <http://www.ncbi.nlm.nih.gov/pubmed/24943963>
- 1060 Guzik-Lendrum, S., Rayment, I., Gilbert, S. P. (2017). Homodimeric kinesin-2 KIF3CC promotes  
1061 microtubule dynamics. *Biophys J* 113, 1845-1857 -- <http://www.ncbi.nlm.nih.gov/pubmed/29045878>



- 1062 Hahn, I., Ronshaugen, M., Sánchez-Soriano, N., Prokop, A. (2016). Functional and genetic analysis of  
1063 spectraplakins in *Drosophila*. *Methods Enzymol* 569, 373-405 -- <https://tinyurl.com/y4vhld56>
- 1064 Hall, A., Lalli, G. (2010). Rho and Ras GTPases in axon growth, guidance, and branching. *Cold Spring*  
1065 *Harb Perspect Biol* 2, a001818 --  
1066 [http://www.ncbi.nlm.nih.gov/entrez/query.fcgi?cmd=Retrieve&db=PubMed&dopt=Citation&list\\_uids=20](http://www.ncbi.nlm.nih.gov/entrez/query.fcgi?cmd=Retrieve&db=PubMed&dopt=Citation&list_uids=20182621)  
1067 [182621](http://www.ncbi.nlm.nih.gov/entrez/query.fcgi?cmd=Retrieve&db=PubMed&dopt=Citation&list_uids=20182621)
- 1068 Havlicek, S., Kohl, Z., Mishra, H. K., Prots, I., Eberhardt, E., Denguir, N., Wend, H., Plotz, S., Boyer, L.,  
1069 Marchetto, M. C., Aigner, S., Sticht, H., Groemer, T. W., Hehr, U., Lampert, A., Schlotzer-Schrehardt,  
1070 U., Winkler, J., Gage, F. H., Winner, B. (2014). Gene dosage-dependent rescue of HSP neurite  
1071 defects in SPG4 patients' neurons. *Hum Mol Genet* 23, 2527-41 --  
1072 <http://www.ncbi.nlm.nih.gov/pubmed/24381312>
- 1073 Hawkins, T., Mirigian, M., Selcuk Yasar, M., Ross, J. L. (2010). Mechanics of microtubules. *J Biomech*  
1074 43, 23-30 -- <http://www.ncbi.nlm.nih.gov/pubmed/19815217>  
1075 special issue: <http://www.sciencedirect.com/science/journal/00219290/43/1>
- 1076 He, L., Ahmad, M., Perrimon, N. (2019). Mechanosensitive channels and their functions in stem cell  
1077 differentiation. *Exp Cell Res* 374, 259-265 -- <http://www.ncbi.nlm.nih.gov/pubmed/30500393>
- 1078 He, Y., Francis, F., Myers, K. A., Yu, W., Black, M. M., Baas, P. W. (2005). Role of cytoplasmic dynein in  
1079 the axonal transport of microtubules and neurofilaments. *J Cell Biol* 168, 697-703 --  
1080 [http://www.ncbi.nlm.nih.gov/entrez/query.fcgi?cmd=Retrieve&db=PubMed&dopt=Citation&list\\_uids=15](http://www.ncbi.nlm.nih.gov/entrez/query.fcgi?cmd=Retrieve&db=PubMed&dopt=Citation&list_uids=15728192)  
1081 [728192](http://www.ncbi.nlm.nih.gov/entrez/query.fcgi?cmd=Retrieve&db=PubMed&dopt=Citation&list_uids=15728192)
- 1082 Heidemann, S. R., Buxbaum, R. E. (1990). Tension as a regulator and integrator of axonal growth. *Cell*  
1083 *Motil Cytoskeleton* 17, 6-10 -- <http://www.ncbi.nlm.nih.gov/pubmed/2225090>
- 1084 Heidemann, S. R., Lamoureux, P., Buxbaum, R. E. (1990). Growth cone behavior and production of  
1085 traction force. *J Cell Biol* 111, 1949-57 --  
1086 <http://jcb.rupress.org/manchester.idm.oclc.org/content/111/5/1949.long>
- 1087 Hess, H., Clemmens, J., Brunner, C., Doot, R., Luna, S., Ernst, K. H., Vogel, V. (2005). Molecular self-  
1088 assembly of "nanowires" and "nanospools" using active transport. *Nano Lett* 5, 629-33 --  
1089 <http://www.ncbi.nlm.nih.gov/pubmed/15826099>
- 1090 Hinckelmann, M. V., Virlogeux, A., Niehage, C., Poujol, C., Choquet, D., Hoflack, B., Zala, D., Saudou, F.  
1091 (2016). Self-propelling vesicles define glycolysis as the minimal energy machinery for neuronal  
1092 transport. *Nat Commun* 7, 13233 -- <http://www.ncbi.nlm.nih.gov/pubmed/27775035>
- 1093 Hirokawa, N. (1982). Cross-linker system between neurofilaments, microtubules, and membranous  
1094 organelles in frog axons revealed by the quick-freeze, deep-etching method. *J Cell Biol* 94, 129-42 --  
1095 <http://www.ncbi.nlm.nih.gov/pubmed/6181077>
- 1096 Hirokawa, N. (1986). 270K microtubule-associated protein cross-reacting with anti-MAP2 IgG in the  
1097 crayfish peripheral nerve axon. *J Cell Biol* 103, 33-9 -- <http://www.ncbi.nlm.nih.gov/pubmed/3722268>
- 1098 Hirokawa, N., Niwa, S., Tanaka, Y. (2010). Molecular motors in neurons: transport mechanisms and roles  
1099 in brain function, development, and disease. *Neuron* 68, 610-638 --  
1100 <http://www.ncbi.nlm.nih.gov/pubmed/21092854>
- 1101 Hoffman, P. N. (1995). Review : The Synthesis, Axonal Transport, and Phosphorylation of Neurofilaments  
1102 Determine Axonal Caliber in Myelinated Nerve Fibers. *The Neuroscientist* 1, 76-83 --  
1103 <https://journals.sagepub.com/doi/abs/10.1177/107385849500100204>
- 1104 Homma, N., Takei, Y., Tanaka, Y., Nakata, T., Terada, S., Kikkawa, M., Noda, Y., Hirokawa, N. (2003).  
1105 Kinesin superfamily protein 2A (KIF2A) functions in suppression of collateral branch extension. *Cell*  
1106 114, 229-39 -- <http://www.ncbi.nlm.nih.gov/pubmed/12887924>
- 1107 Howard, J. (2001). "Mechanics of motorproteins and the cytoskeleton." Sinauer Assoc., Sunderland --
- 1108 Howes, S. C., Alushin, G. M., Shida, T., Nachury, M. V., Nogales, E. (2014). Effects of tubulin acetylation  
1109 and tubulin acetyltransferase binding on microtubule structure. *Mol Biol Cell* 25, 257-66 --  
1110 <http://www.ncbi.nlm.nih.gov/pubmed/24227885>
- 1111 Hummel, T., Krukkert, K., Roos, J., Davis, G., Klämbt, C. (2000). *Drosophila* Futsch/22C10 is a MAP1B-  
1112 like protein required for dendritic and axonal development. *Neuron* 26, 357-370 --  
1113 [https://www.cell.com/neuron/fulltext/S0896-6273\(00\)81169-1](https://www.cell.com/neuron/fulltext/S0896-6273(00)81169-1)
- 1114 Hur, E. M., Saijilafu, Lee, B. D., Kim, S. J., Xu, W. L., Zhou, F. Q. (2011). GSK3 controls axon growth via  
1115 CLASP-mediated regulation of growth cone microtubules. *Genes Dev* 25, 1968-81 --  
1116 [http://www.ncbi.nlm.nih.gov/entrez/query.fcgi?cmd=Retrieve&db=PubMed&dopt=Citation&list\\_uids=21](http://www.ncbi.nlm.nih.gov/entrez/query.fcgi?cmd=Retrieve&db=PubMed&dopt=Citation&list_uids=21937714)  
1117 [937714](http://www.ncbi.nlm.nih.gov/entrez/query.fcgi?cmd=Retrieve&db=PubMed&dopt=Citation&list_uids=21937714)

- 1118 Hyman, A. A., Chretien, D., Arnal, I., Wade, R. H. (1995). Structural changes accompanying GTP  
1119 hydrolysis in microtubules: information from a slowly hydrolyzable analogue guanylyl-(alpha,beta)-  
1120 methylene-diphosphonate. *J Cell Biol* 128, 117-25 -- <http://www.ncbi.nlm.nih.gov/pubmed/7822409>
- 1121 Ichikawa, M., Bui, K. H. (2018). Microtubule inner proteins: a meshwork of luminal proteins stabilizing the  
1122 doublet microtubule. *BioEssays* 40, 1700209 --  
1123 <https://onlinelibrary.wiley.com/doi/abs/10.1002/bies.201700209>
- 1124 Ingber, D., Folkman, J. (1989). Tension and compression as basic determinants of cell form and function:  
1125 Utilization of a cellular tensegrity mechanism. In "Cell Shape: Determinants, Regulation and  
1126 Regulatory Role" (W. Stein, F. Bronner, Eds.), pp. 3-31. Academic Press, San Diego
- 1127 Janke, C., Kneussel, M. (2010). Tubulin post-translational modifications: encoding functions on the  
1128 neuronal microtubule cytoskeleton. *Trends Neurosci* 33, 362-72 --  
1129 [http://www.ncbi.nlm.nih.gov/entrez/query.fcgi?cmd=Retrieve&db=PubMed&dopt=Citation&list\\_uids=20](http://www.ncbi.nlm.nih.gov/entrez/query.fcgi?cmd=Retrieve&db=PubMed&dopt=Citation&list_uids=20541813)  
1130 [541813](http://www.ncbi.nlm.nih.gov/entrez/query.fcgi?cmd=Retrieve&db=PubMed&dopt=Citation&list_uids=20541813)
- 1131 Janning, D., Igaev, M., Sundermann, F., Bruhmann, J., Beutel, O., Heinisch, J. J., Bakota, L., Piehler, J.,  
1132 Junge, W., Brandt, R. (2014). Single-molecule tracking of tau reveals fast kiss-and-hop interaction with  
1133 microtubules in living neurons. *Mol Biol Cell* 25, 3541-51 --  
1134 <http://www.ncbi.nlm.nih.gov/pubmed/25165145>
- 1135 Jenkins, B. V., Saunders, H. A. J., Record, H. L., Johnson-Schlitz, D. M., Wildonger, J. (2017). Effects of  
1136 mutating alpha-tubulin lysine 40 on sensory dendrite development. *J Cell Sci* 130, 4120-4131 --  
1137 <http://www.ncbi.nlm.nih.gov/pubmed/29122984>
- 1138 Jiang, K., Faltova, L., Hua, S., Capitani, G., Prota, A. E., Landgraf, C., Volkmer, R., Kammerer, R. A.,  
1139 Steinmetz, M. O., Akhmanova, A. (2018). Structural basis of formation of the microtubule minus-end-  
1140 regulating CAMSAP-katanin complex. *Structure* 26, 375-382 e4 --  
1141 <http://www.ncbi.nlm.nih.gov/pubmed/29395789>
- 1142 Kabir, A. M., Inoue, D., Hamano, Y., Mayama, H., Sada, K., Kakugo, A. (2014). Biomolecular motor  
1143 modulates mechanical property of microtubule. *Biomacromolecules* 15, 1797-805 --  
1144 <http://www.ncbi.nlm.nih.gov/pubmed/24697688>
- 1145 Kader, M. A., Satake, T., Yoshida, M., Hayashi, I., Suzuki, A. (2017). Molecular basis of the microtubule-  
1146 regulating activity of microtubule crosslinking factor 1. *PLoS One* 12, e0182641 --  
1147 <https://doi.org/10.1371/journal.pone.0182641>
- 1148 Kalil, K., Dent, E. W. (2014). Branch management: mechanisms of axon branching in the developing  
1149 vertebrate CNS. *Nat Rev Neurosci* 15, 7-18 -- <http://www.ncbi.nlm.nih.gov/pubmed/24356070>
- 1150 Kandel, E. R., Schwartz, J. H., Jessell, T. M., Siegelbaum, S., Hudspeth, A. J. (2012). "Principles of  
1151 neural science (5<sup>th</sup> edition)." McGraw-Hill Publishing, --  
1152 <https://ebookcentral.proquest.com/lib/manchester/detail.action?docID=4959346#>
- 1153 Kapur, M., Wang, W., Maloney, M. T., Millan, I., Lundin, V. F., Tran, T. A., Yang, Y. (2012). Calcium tips  
1154 the balance: a microtubule plus end to lattice binding switch operates in the carboxyl terminus of  
1155 BPAG1n4. *EMBO Rep* 13, 1021-9 -- <http://www.ncbi.nlm.nih.gov/pubmed/22995871>
- 1156 Karabay, A., Yu, W., Solowska, J. M., Baird, D. H., Baas, P. W. (2004). Axonal growth is sensitive to the  
1157 levels of katanin, a protein that severs microtubules. *J Neurosci* 24, 5778-88 --  
1158 [http://www.ncbi.nlm.nih.gov/entrez/query.fcgi?cmd=Retrieve&db=PubMed&dopt=Citation&list\\_uids=15](http://www.ncbi.nlm.nih.gov/entrez/query.fcgi?cmd=Retrieve&db=PubMed&dopt=Citation&list_uids=15215300)  
1159 [215300](http://www.ncbi.nlm.nih.gov/entrez/query.fcgi?cmd=Retrieve&db=PubMed&dopt=Citation&list_uids=15215300)
- 1160 Kaverina, I., Krylyshkina, O., Beningo, K., Anderson, K., Wang, Y. L., Small, J. V. (2002). Tensile stress  
1161 stimulates microtubule outgrowth in living cells. *J Cell Sci* 115, 2283-91 --  
1162 <http://www.ncbi.nlm.nih.gov/pubmed/12006613>
- 1163 Kawamura, R., Kakugo, A., Shikinaka, K., Osada, Y., Gong, J. P. (2008). Ring-Shaped Assembly of  
1164 Microtubules Shows Preferential Counterclockwise Motion. *Biomacromolecules* 9, 2277-2282 --  
1165 <http://dx.doi.org/10.1021/bm800639w>
- 1166 Kerssemakers, J., Howard, J., Hess, H., Diez, S. (2006). The distance that kinesin-1 holds its cargo from  
1167 the microtubule surface measured by fluorescence interference contrast microscopy. *Proc Natl Acad*  
1168 *Sci U S A* 103, 15812-7 -- <http://www.ncbi.nlm.nih.gov/pubmed/17035506>
- 1169 Ketschek, A. R., Jones, S. L., Gallo, G. (2007). Axon extension in the fast and slow lanes: substratum-  
1170 dependent engagement of myosin II functions. *Dev Neurobiol* 67, 1305-20 --  
1171 <http://www.ncbi.nlm.nih.gov/pubmed/17638383>
- 1172 Kleele, T., Marinković, P., Williams, P. R., Stern, S., Weigand, E. E., Engerer, P., Naumann, R.,  
1173 Hartmann, J., Karl, R. M., Bradke, F., Bishop, D., Herms, J., Konnerth, A., Kerschensteiner, M.,  
1174 Godinho, L., Misgeld, T. (2014). An assay to image neuronal microtubule dynamics in mice. *Nat*

- 1175 Commun 5, 4827 -- <http://dx.doi.org/10.1038/ncomms5827>
- 1176 Koch, D., Rosoff, W. J., Jiang, J., Geller, H. M., Urbach, J. S. (2012). Strength in the periphery: growth  
1177 cone biomechanics and substrate rigidity response in peripheral and central nervous system neurons.  
1178 *Biophys J* 102, 452-60 -- <http://www.ncbi.nlm.nih.gov/pubmed/22325267>
- 1179 Koh, K., Ishiura, H., Tsuji, S., Takiyama, Y. (2018). JASPAC: Japan Spastic Paraplegia Research  
1180 Consortium. *Brain Sci* 8 -- <http://www.ncbi.nlm.nih.gov/pubmed/30104498>
- 1181 Kononova, O., Kholodov, Y., Theisen, K. E., Marx, K. A., Dima, R. I., Ataulakhanov, F. I., Grishchuk, E.  
1182 L., Barsegov, V. (2014). Tubulin bond energies and microtubule biomechanics determined from  
1183 nanoindentation in silico. *J Am Chem Soc* 136, 17036-17045 -- <https://doi.org/10.1021/ja506385p>
- 1184 Koper, A., Schenck, A., Prokop, A. (2012). Analysis of adhesion molecules and basement membrane  
1185 contributions to synaptic adhesion at the *Drosophila* embryonic NMJ. *PLoS One* 7, e36339 --  
1186 <http://www.ncbi.nlm.nih.gov/pubmed/22558441>
- 1187 Krebs, A., Goldie, K. N., Hoenger, A. (2004). Complex formation with kinesin motor domains affects the  
1188 structure of microtubules. *J Mol Biol* 335, 139-53 -- <http://www.ncbi.nlm.nih.gov/pubmed/14659746>
- 1189 Krendel, M., Mooseker, M. S. (2005). Myosins: tails (and heads) of functional diversity. *Physiology*  
1190 (*Bethesda*) 20, 239-51 -- <http://www.ncbi.nlm.nih.gov/pubmed/16024512>
- 1191 Krieg, M., Stühmer, J., Cueva, J. G., Fetter, R., Spilker, K., Cremers, D., Shen, K., Dunn, A. R.,  
1192 Goodman, M. B. (2017). Genetic defects in  $\beta$ -spectrin and tau sensitize *C. elegans* axons to  
1193 movement-induced damage via torque-tension coupling. *Elife* 6, e20172 --  
1194 <https://doi.org/10.7554/eLife.20172>
- 1195 Kuijpers, M., van de Willige, D., Freal, A., Chazeau, A., Franker, Mariella A., Hofenk, J., Rodrigues,  
1196 Ricardo J. C., Kapitein, Lukas C., Akhmanova, A., Jaarsma, D., Hoogenraad, Casper C. (2016).  
1197 Dynein regulator NDEL1 controls polarized cargo transport at the axon initial segment. *Neuron* 89,  
1198 461-471 -- <http://www.sciencedirect.com/science/article/pii/S0896627316000477>
- 1199 Lacroix, B., van Dijk, J., Gold, N. D., Guizetti, J., Aldrian-Herrada, G., Rogowski, K., Gerlich, D. W.,  
1200 Janke, C. (2010). Tubulin polyglutamylation stimulates spastin-mediated microtubule severing. *J Cell*  
1201 *Biol* 189, 945-54 -- <http://www.ncbi.nlm.nih.gov/pubmed/20530212>
- 1202 Lam, A. T., Curschellas, C., Krovvidi, D., Hess, H. (2014). Controlling self-assembly of microtubule spools  
1203 via kinesin motor density. *Soft Matter* 10, 8731-8736 -- <http://dx.doi.org/10.1039/C4SM01518E>
- 1204 Lam, A. T., VanDelinder, V., Kabir, A. M. R., Hess, H., Bachand, G. D., Kakugo, A. (2016). Cytoskeletal  
1205 motor-driven active self-assembly in *in vitro* systems. *Soft Matter* 12, 988-997 --  
1206 <http://dx.doi.org/10.1039/C5SM02042E>
- 1207 Lamoureux, P., Buxbaum, R. E., Heidemann, S. R. (1989). Direct evidence that growth cones pull. *Nature*  
1208 340, 159-162 -- <https://www.nature.com/articles/340159a0>
- 1209 Lamoureux, P., Heidemann, S. R., Martzke, N. R., Miller, K. E. (2010). Growth and elongation within and  
1210 along the axon. *Dev Neurobiol* 70, 135-49 --  
1211 [http://www.ncbi.nlm.nih.gov/entrez/query.fcgi?cmd=Retrieve&db=PubMed&dopt=Citation&list\\_uids=19950193](http://www.ncbi.nlm.nih.gov/entrez/query.fcgi?cmd=Retrieve&db=PubMed&dopt=Citation&list_uids=19950193)  
1212
- 1213 Langford, G. M. (1980). Arrangement of subunits in microtubules with 14 protofilaments. *J Cell Biol* 87, 521-  
1214 6 -- <http://www.ncbi.nlm.nih.gov/pubmed/7430256>
- 1215 Lansky, Z., Braun, M., Lüdecke, A., Schlierf, M., ten Wolde, Pieter R., Janson, Marcel E., Diez, S. (2015).  
1216 Diffusible crosslinkers generate directed forces in microtubule networks. *Cell* 160, 1159-68 --  
1217 [http://www.cell.com/cell/abstract/S0092-8674\(15\)00129-4](http://www.cell.com/cell/abstract/S0092-8674(15)00129-4)
- 1218 Lazarus, C., Soheilypour, M., Mofrad, Mohammad R. K. (2015). Torsional behavior of axonal microtubule  
1219 bundles. *Biophys J* 109, 231-239 --  
1220 <http://www.sciencedirect.com/science/article/pii/S0006349515006128>
- 1221 Lazarus, J. E., Moughamian, A. J., Tokito, M. K., Holzbaur, E. L. (2013). Dynactin subunit p150(Glued) is  
1222 a neuron-specific anti-catastrophe factor. *PLoS Biol* 11, e1001611 --  
1223 <http://www.ncbi.nlm.nih.gov/pubmed/23874158>
- 1224 Lee, G., Brandt, R. (1992). Microtubule bundling studies revisited: is there a role for MAPs? *Trends in Cell*  
1225 *Biology* 2, 286-289 -- <http://www.sciencedirect.com/science/article/pii/096289249290106W>
- 1226 Leo, L., Yu, W., D'Rozario, M., Waddell, E. A., Marena, D. R., Baird, M. A., Davidson, M. W., Zhou, B.,  
1227 Wu, B., Baker, L., Sharp, D. J., Baas, P. W. (2015). Vertebrate fidgetin restrains axonal growth by  
1228 severing labile domains of microtubules. *Cell Rep* 12, 1723-30 --  
1229 <http://dx.doi.org/10.1016/j.celrep.2015.08.017>
- 1230 Leterrier, C. (2018). The axon initial segment: an updated viewpoint. *J Neurosci* 38, 2135-2145 --

- 1231 <http://www.jneurosci.org/content/jneuro/38/9/2135.full.pdf>
- 1232 Leterrier, C., Dubey, P., Roy, S. (2017). The nano-architecture of the axonal cytoskeleton. *Nature*
- 1233 *Reviews Neuroscience* 18, 713-726 -- <http://dx.doi.org/10.1038/nrn.2017.129>
- 1234 Letourneau, P. C., Shattuck, T. A., Ressler, A. H. (1987). "Pull" and "push" in neurite elongation:
- 1235 observations on the effects of different concentrations of cytochalasin B and taxol. *Cell Motil*
- 1236 *Cytoskeleton* 8, 193-209 --
- 1237 [http://www.ncbi.nlm.nih.gov/entrez/query.fcgi?cmd=Retrieve&db=PubMed&dopt=Citation&list\\_uids=28](http://www.ncbi.nlm.nih.gov/entrez/query.fcgi?cmd=Retrieve&db=PubMed&dopt=Citation&list_uids=2891448)
- 1238 [91448](http://www.ncbi.nlm.nih.gov/entrez/query.fcgi?cmd=Retrieve&db=PubMed&dopt=Citation&list_uids=2891448)
- 1239 Li, S., Wang, C., Nithiarasu, P. (2018). Effects of the cross-linkers on the buckling of microtubules in cells.
- 1240 *J Biomech Eng* -- <http://www.sciencedirect.com/science/article/pii/S0021929018301544>
- 1241 Lin, S., Liu, M., Mozgova, O. I., Yu, W., Baas, P. W. (2012). Mitotic motors coregulate microtubule
- 1242 patterns in axons and dendrites. *J Neurosci* 32, 14033-49 --
- 1243 <http://www.ncbi.nlm.nih.gov/pubmed/23035110>
- 1244 Liu, H., Bachand, G. D. (2013). Effects of Confinement on Molecular Motor-Driven Self-Assembly of Ring
- 1245 Structures. *Cellular and Molecular Bioengineering* 6, 98-108 -- [https://doi.org/10.1007/s12195-012-](https://doi.org/10.1007/s12195-012-0256-5)
- 1246 [0256-5](https://doi.org/10.1007/s12195-012-0256-5)
- 1247 Liu, H., Spoerke, E. D., Bachand, M., Koch, S. J., Bunker, B. C., Bachand, G. D. (2008). Biomolecular
- 1248 Motor-Powered Self-Assembly of Dissipative Nanocomposite Rings. *Advanced Materials* 20, 4476-
- 1249 4481 -- <https://onlinelibrary.wiley.com/doi/abs/10.1002/adma.200801291>
- 1250 Liu, L., Tuzel, E., Ross, J. L. (2011). Loop formation of microtubules during gliding at high density. *J Phys*
- 1251 *Condens Matter* 23, 374104 -- <http://www.ncbi.nlm.nih.gov/pubmed/21862840>
- 1252 Liu, M., Nadar, V. C., Kozielski, F., Kozłowska, M., Yu, W., Baas, P. W. (2010). Kinesin-12, a mitotic
- 1253 microtubule-associated motor protein, impacts axonal growth, navigation, and branching. *J Neurosci*
- 1254 30, 14896-906 --
- 1255 [http://www.ncbi.nlm.nih.gov/entrez/query.fcgi?cmd=Retrieve&db=PubMed&dopt=Citation&list\\_uids=21](http://www.ncbi.nlm.nih.gov/entrez/query.fcgi?cmd=Retrieve&db=PubMed&dopt=Citation&list_uids=21048148)
- 1256 [048148](http://www.ncbi.nlm.nih.gov/entrez/query.fcgi?cmd=Retrieve&db=PubMed&dopt=Citation&list_uids=21048148)
- 1257 Liu, Z., Zhou, T., Ziegler, A. C., Dimitrion, P., Zuo, L. (2017). Oxidative Stress in Neurodegenerative
- 1258 Diseases: From Molecular Mechanisms to Clinical Applications. *Oxid Med Cell Longev* 2017, 2525967
- 1259 -- <http://www.ncbi.nlm.nih.gov/pubmed/28785371>
- 1260 Lu, W., Fox, P., Lakonishok, M., Davidson, Michael W., Gelfand, Vladimir I. (2013). Initial neurite
- 1261 outgrowth in *Drosophila* neurons is driven by Kinesin-powered microtubule sliding. *Current Biology* 23,
- 1262 1018-1023 -- <http://www.sciencedirect.com/science/article/pii/S0960982213004910>
- 1263 Lu, W., Gelfand, V. I. (2017). Moonlighting Motors: Kinesin, Dynein, and Cell Polarity. *Trends Cell Biol* --
- 1264 <http://www.ncbi.nlm.nih.gov/pubmed/28284467>
- 1265 Luria, I., Crenshaw, J., Downs, M., Agarwal, A., Seshadri, S. B., Gonzales, J., Idan, O., Kamcev, J.,
- 1266 Katira, P., Pandey, S., Nitta, T., Phillipot, S. R., Hess, H. (2011). Microtubule nanospool formation by
- 1267 active self-assembly is not initiated by thermal activation. *Soft Matter* 7, 3108-3115 --
- 1268 <http://dx.doi.org/10.1039/C0SM00802H>
- 1269 Maas, T., Eidenmuller, J., Brandt, R. (2000). Interaction of tau with the neural membrane cortex is
- 1270 regulated by phosphorylation at sites that are modified in paired helical filaments. *J. Biol. Chem.* 275,
- 1271 15733-40 -- <http://www.jbc.org/manchester.idm.oclc.org/content/275/21/15733>
- 1272 Machin, N. A., Lee, J. M., Barnes, G. (1995). Microtubule stability in budding yeast: characterization and
- 1273 dosage suppression of a benomyl-dependent tubulin mutant. *Mol Biol Cell* 6, 1241-1259 --
- 1274 <https://www.molbiolcell.org/doi/abs/10.1091/mbc.6.9.1241>
- 1275 Mao, C.-X., Xiong, Y., Xiong, Z., Wang, Q., Zhang, Y. Q., Jin, S. (2014). Microtubule-severing protein
- 1276 Katanin regulates neuromuscular junction development and dendritic elaboration in *Drosophila*.
- 1277 *Development* 141, 1064-1074 -- <http://dev.biologists.org/content/141/5/1064.abstract>
- 1278 Marner, L., Nyengaard, J. R., Tang, Y., Pakkenberg, B. (2003). Marked loss of myelinated nerve fibers in
- 1279 the human brain with age. *J Comp Neurol* 462, 144-52 --
- 1280 <http://www.ncbi.nlm.nih.gov/pubmed/12794739>
- 1281 McBride, H. M., Neuspiel, M., Wasiak, S. (2006). Mitochondria: more than just a powerhouse. *Curr Biol*
- 1282 16, R551-60 -- <http://www.ncbi.nlm.nih.gov/pubmed/16860735>
- 1283 McNally, F. J., Roll-Mecak, A. (2018). Microtubule-severing enzymes: From cellular functions to molecular
- 1284 mechanism. *J Cell Biol* 217, 4057-69 -- <http://jcb.rupress.org/content/early/2018/10/31/jcb.201612104>
- 1285 McVicker, D. P., Millette, M. M., Dent, E. W. (2015). Signaling to the microtubule cytoskeleton: an
- 1286 unconventional role for CaMKII. *Dev Neurobiol* 75, 423-34 --
- 1287 <http://www.ncbi.nlm.nih.gov/pubmed/25156276>

- 1288 Medana, I. M., Esiri, M. M. (2003). Axonal damage: a key predictor of outcome in human CNS diseases.  
1289 *Brain* 126, 515-30 -- <http://www.ncbi.nlm.nih.gov/pubmed/12566274>
- 1290 Memet, E., Hilitski, F., Morris, M. A., Schwenger, W. J., Dogic, Z., Mahadevan, L. (2018). Microtubules  
1291 soften due to cross-sectional flattening. *Elife* 7 -- <http://www.ncbi.nlm.nih.gov/pubmed/29856317>
- 1292 Méphon-Gaspard, A., Boca, M., Pioche-Durieu, C., Desforges, B., Burgo, A., Hamon, L., Piétrement, O.,  
1293 Pastré, D. (2016). Role of tau in the spatial organization of axonal microtubules: keeping parallel  
1294 microtubules evenly distributed despite macromolecular crowding. *Cell Mol Life Sci* 73, 3745-3760 --  
1295 <https://www.ncbi.nlm.nih.gov/pubmed/27076215>
- 1296 Meyer, K., Kaspar, B. K. (2017). Glia-neuron interactions in neurological diseases: Testing non-cell  
1297 autonomy in a dish. *Brain Res* 1656, 27-39 -- <https://www.ncbi.nlm.nih.gov/pubmed/26778174>
- 1298 Migh, E., Götz, T., Földi, I., Szikora, S., Gombos, R., Darula, Z., Medzihradzsky, K. F., Maléth, J., Hegyi,  
1299 P., Sigrist, S., Mihály, J. (2018). Microtubule organization in presynaptic boutons relies on the formin  
1300 DAAM. *Development*, dev.158519 --  
1301 <http://dev.biologists.org/content/develop/early/2018/02/21/dev.158519.full>
- 1302 Miller, K. E., Sheetz, M. P. (2006). Direct evidence for coherent low velocity axonal transport of  
1303 mitochondria. *J Cell Biol* 173, 373-81 -- <http://www.ncbi.nlm.nih.gov/pubmed/16682527>
- 1304 Miller, K. E., Suter, D. M. (2018). An integrated cytoskeletal model of neurite outgrowth. *Front Cell*  
1305 *Neurosci* 12 -- <https://www.frontiersin.org/article/10.3389/fncel.2018.00447>
- 1306 Mohan, R., John, A. (2015). Microtubule-associated proteins as direct crosslinkers of actin filaments and  
1307 microtubules. *IUBMB Life* 67, 395-403 --  
1308 <https://iubmb.onlinelibrary.wiley.com/doi/abs/10.1002/iub.1384>
- 1309 Monroy, B. Y., Sawyer, D. L., Ackermann, B. E., Borden, M. M., Tan, T. C., Ori-McKenney, K. M. (2018).  
1310 Competition between microtubule-associated proteins directs motor transport. *Nat Commun* 9, 1487 --  
1311 <https://doi.org/10.1038/s41467-018-03909-2>
- 1312 Morikawa, M., Yajima, H., Nitta, R., Inoue, S., Ogura, T., Sato, C., Hirokawa, N. (2015). X-ray and Cryo-  
1313 EM structures reveal mutual conformational changes of Kinesin and GTP-state microtubules upon  
1314 binding. *EMBO J* 34, 1270-86 -- <http://www.ncbi.nlm.nih.gov/pubmed/25777528>
- 1315 Muto, E., Sakai, H., Kaseda, K. (2005). Long-range cooperative binding of kinesin to a microtubule in the  
1316 presence of ATP. *J Cell Biol* 168, 691-6 -- <http://www.ncbi.nlm.nih.gov/pubmed/15738263>
- 1317 Myers, K. A., Baas, P. W. (2007). Kinesin-5 regulates the growth of the axon by acting as a brake on its  
1318 microtubule array. *J Cell Biol* 178, 1081-91 -- <http://www.ncbi.nlm.nih.gov/pubmed/17846176>
- 1319 Myers, K. A., He, Y., Hasaka, T. P., Baas, P. W. (2006). Microtubule transport in the axon: Re-thinking a  
1320 potential role for the actin cytoskeleton. *Neuroscientist* 12, 107-18 --  
1321 [http://www.ncbi.nlm.nih.gov/entrez/query.fcgi?cmd=Retrieve&db=PubMed&dopt=Citation&list\\_uids=16514008](http://www.ncbi.nlm.nih.gov/entrez/query.fcgi?cmd=Retrieve&db=PubMed&dopt=Citation&list_uids=16514008)  
1322
- 1323 Nadar, V. C., Lin, S., Baas, P. W. (2012). Microtubule redistribution in growth cones elicited by focal  
1324 inactivation of kinesin-5. *J Neurosci* 32, 5783-94 -- <http://www.ncbi.nlm.nih.gov/pubmed/22539840>
- 1325 Nakashima, K. K., Vibhute, M. A., Spruijt, E. (2019). Biomolecular Chemistry in Liquid Phase Separated  
1326 Compartments. *Frontiers in Molecular Biosciences* 6 --  
1327 <https://www.frontiersin.org/article/10.3389/fmolb.2019.00021>
- 1328 Nashchekin, D., Fernandes, Artur R., St Johnston, D. (2016). Patronin/Shot cortical foci assemble the  
1329 noncentrosomal microtubule array that specifies the *Drosophila* anterior-posterior axis. *Dev Cell* 38,  
1330 61-72 -- <http://dx.doi.org/10.1016/j.devcel.2016.06.010>
- 1331 Nguyen, M. D., Lariviere, R. C., Julien, J. P. (2000). Reduction of axonal caliber does not alleviate motor  
1332 neuron disease caused by mutant superoxide dismutase 1. *Proc Natl Acad Sci U S A* 97, 12306-11 --  
1333 <http://www.ncbi.nlm.nih.gov/pubmed/11050249>
- 1334 Ning, W., Yu, Y., Xu, H., Liu, X., Wang, D., Wang, J., Wang, Y., Meng, W. (2016). The CAMSAP3-ACF7  
1335 complex couples noncentrosomal microtubules with actin filaments to coordinate their dynamics. *Dev*  
1336 *Cell* 39, 61-74 -- <http://www.sciencedirect.com/science/article/pii/S1534580716305998>
- 1337 Nogales, E., Wolf, S. G., Khan, I. A., Luduena, R. F., Downing, K. H. (1995). Structure of tubulin at 6.5 Å  
1338 and location of the taxol-binding site. *Nature* 375, 424-7 -- <https://www.nature.com/articles/375424a0>  
1339 <http://www.ncbi.nlm.nih.gov/pubmed/7760939>
- 1340 Noordstra, I., Liu, Q., Nijenhuis, W., Hua, S., Jiang, K., Baars, M., Rimmelzwaal, S., Martin, M., Kapitein,  
1341 L. C., Akhmanova, A. (2016). Control of apico-basal epithelial polarity by the microtubule minus-end-  
1342 binding protein CAMSAP3 and spectraplakins ACF7. *J Cell Sci* 129, 4278-4288 --  
1343 <http://www.ncbi.nlm.nih.gov/pubmed/27802168>

- 1344 O'Brien, E. T., Salmon, E. D., Erickson, H. P. (1997). How calcium causes microtubule depolymerization.  
1345 *Cell Motility* 36, 125-135 -- <https://onlinelibrary.wiley.com/doi/abs/10.1002/%28SICI%291097->  
1346 [0169%281997%2936%3A2%3C125%3A%3AAID-CM3%3E3.0.CO%3B2-8](https://onlinelibrary.wiley.com/doi/abs/10.1002/%28SICI%291097-0169%281997%2936%3A2%3C125%3A%3AAID-CM3%3E3.0.CO%3B2-8)
- 1347 O'Toole, M., Lamoureux, P., Miller, K. E. (2008). A physical model of axonal elongation: force, viscosity,  
1348 and adhesions govern the mode of outgrowth. *Biophys J* 94, 2610-20 --  
1349 <http://www.ncbi.nlm.nih.gov/pubmed/18178646>
- 1350 O'Toole, M., Lamoureux, P., Miller, Kyle E. (2015). Measurement of subcellular force generation in  
1351 neurons. *Biophys J* 108, 1027-1037 --  
1352 <http://www.sciencedirect.com/science/article/pii/S0006349515001150>
- 1353 Odde, D. J., Ma, L., Briggs, A. H., DeMarco, A., Kirschner, M. W. (1999). Microtubule bending and  
1354 breaking in living fibroblast cells. *J Cell Sci* 112, 3283-3288 --  
1355 <http://jcs.biologists.org/content/joces/112/19/3283.full.pdf>
- 1356 Palacci, H., Idan, O., Armstrong, M. J., Agarwal, A., Nitta, T., Hess, H. (2016). Velocity fluctuations in  
1357 kinesin-1 gliding motility assays originate in motor attachment geometry variations. *Langmuir* 32,  
1358 7943-50 -- <http://www.ncbi.nlm.nih.gov/pubmed/27414063>
- 1359 Pan, S., Chan, J. R. (2017). Regulation and dysregulation of axon infrastructure by myelinating glia.  
1360 *Journal Cell Biol* 216, 3903-3916 -- <http://jcb.rupress.org/content/jcb/216/12/3903.full.pdf>
- 1361 Papadopoulos, C., Orso, G., Mancuso, G., Herholz, M., Gumeni, S., Tadepalle, N., Jungst, C.,  
1362 Tzschichholz, A., Schauss, A., Honing, S., Trifunovic, A., Daga, A., Rugarli, E. I. (2015). Spastin binds  
1363 to lipid droplets and affects lipid metabolism. *PLoS Genet* 11, e1005149 --  
1364 <http://www.ncbi.nlm.nih.gov/pubmed/25875445>
- 1365 Park, J. H., Roll-Mecak, A. (2018). The tubulin code in neuronal polarity. *Curr Opin Neurobiol* 51, 95-102 -  
1366 - <http://www.ncbi.nlm.nih.gov/pubmed/29554585>
- 1367 Park, S. H., Zhu, P. P., Parker, R. L., Blackstone, C. (2010). Hereditary spastic paraplegia proteins  
1368 REEP1, spastin, and atlastin-1 coordinate microtubule interactions with the tubular ER network. *J Clin*  
1369 *Invest* 120, 1097-110 -- <https://www.jci.org/articles/view/40979>
- 1370 Pascual-Ahuir, A., Manzanares-Estreded, S., Proft, M. (2017). Pro- and antioxidant functions of the  
1371 peroxisome-mitochondria connection and its impact on aging and disease. *Oxid Med Cell Longev*  
1372 2017, 9860841 -- <http://www.ncbi.nlm.nih.gov/pubmed/28811869>
- 1373 Pearce, S. P., Heil, M., Jensen, O. E., Jones, G. W., Prokop, A. (2018). Curvature-sensitive kinesin  
1374 binding can explain microtubule ring formation and reveals chaotic dynamics in a mathematical model.  
1375 *Bull Math Biol* 80, 3002-22 -- <https://tinyurl.com/yd43ncb9>
- 1376 Peet, D. R., Burroughs, N. J., Cross, R. A. (2018). Kinesin expands and stabilizes the GDP-microtubule  
1377 lattice. *Nat Nanotechnol* 13, 386-391 -- <http://www.ncbi.nlm.nih.gov/pubmed/29531331>
- 1378 Penazzi, L., Bakota, L., Brandt, R. (2016). Microtubule dynamics in neuronal development, plasticity, and  
1379 neurodegeneration. *Int Rev Cell Mol Biol* 321, 89-169 --  
1380 <http://www.ncbi.nlm.nih.gov/pubmed/26811287>
- 1381 Perrot, R., Berges, R., Bocquet, A., Eyer, J. (2008). Review of the multiple aspects of neurofilament  
1382 functions, and their possible contribution to neurodegeneration. *Mol Neurobiol* 38, 27-65 --  
1383 <http://www.ncbi.nlm.nih.gov/pubmed/18649148>
- 1384 Peter, S. J., Mofrad, M. R. (2012). Computational modeling of axonal microtubule bundles under tension.  
1385 *Biophys J* 102, 749-57 -- <https://www.ncbi.nlm.nih.gov/pubmed/22385845>
- 1386 Pfenninger, K. H. (2009). Plasma membrane expansion: a neuron's Herculean task. *Nat Rev Neurosci*  
1387 10, 251-61 -- <http://www.ncbi.nlm.nih.gov/pubmed/19259102>
- 1388 Pfister, B. J., Iwata, A., Meaney, D. F., Smith, D. H. (2004). Extreme stretch growth of integrated axons. *J*  
1389 *Neurosci* 24, 7978-83 -- <http://www.ncbi.nlm.nih.gov/pubmed/15356212>
- 1390 Pines, M. K., Housden, B. E., Bernard, F., Bray, S. J., Roper, K. (2010). The cytolinker Pigs is a direct  
1391 target and a negative regulator of Notch signalling. *Development* 137, 913-22 --  
1392 [http://www.ncbi.nlm.nih.gov/entrez/query.fcgi?cmd=Retrieve&db=PubMed&dopt=Citation&list\\_uids=20](http://www.ncbi.nlm.nih.gov/entrez/query.fcgi?cmd=Retrieve&db=PubMed&dopt=Citation&list_uids=20)  
1393 [150280](http://www.ncbi.nlm.nih.gov/entrez/query.fcgi?cmd=Retrieve&db=PubMed&dopt=Citation&list_uids=20150280)
- 1394 Popov, S., Brown, A., Poo, M. M. (1993). Forward plasma membrane flow in growing nerve processes.  
1395 *Science* 259, 244-6 -- <http://www.ncbi.nlm.nih.gov/pubmed/7678471>
- 1396 Portran, D., Schaedel, L., Xu, Z., Thery, M., Nachury, M. V. (2017). Tubulin acetylation protects long-lived  
1397 microtubules against mechanical ageing. *Nat Cell Biol* 19, 391-398 --  
1398 <http://dx.doi.org/10.1038/ncb3481>
- 1399 Poruchynsky, M. S., Sackett, D. L., Robey, R. W., Ward, Y., Annunziata, C., Fojo, T. (2008). Proteasome

- 1400 inhibitors increase tubulin polymerization and stabilization in tissue culture cells: A possible  
1401 mechanism contributing to peripheral neuropathy and cellular toxicity following proteasome inhibition.  
1402 *Cell Cycle* 7, 940-949 -- <https://doi.org/10.4161/cc.7.7.5625>
- 1403 Preitner, N., Quan, J., Nowakowski, Dan W., Hancock, Melissa L., Shi, J., Tcherkezian, J., Young-  
1404 Pearce, Tracy L., Flanagan, John G. (2014). APC is an RNA-binding protein, and its interactome  
1405 provides a link to neural development and microtubule assembly. *Cell* 158, 368-382 --  
1406 <http://www.sciencedirect.com/science/article/pii/S0092867414007478>
- 1407 Prezel, E., Elie, A., Delaroche, J., Stoppin-Mellet, V., Bosc, C., Serre, L., Fourest-Lieuvain, A., Andrieux,  
1408 A., Vantard, M., Arnal, I., Zhu, X. (2018). Tau can switch microtubule network organizations: from  
1409 random networks to dynamic and stable bundles. *Molecular Biology of the Cell* 29, 154-165 --  
1410 <https://www.molbiolcell.org/doi/abs/10.1091/mbc.E17-06-0429>
- 1411 Prior, R., Van Helleputte, L., Benoy, V., Van Den Bosch, L. (2017). Defective axonal transport: A common  
1412 pathological mechanism in inherited and acquired peripheral neuropathies. *Neurobiol Dis* 105, 300-  
1413 320 -- <http://www.ncbi.nlm.nih.gov/pubmed/28238949>
- 1414 Prokop, A. (2013). The intricate relationship between microtubules and their associated motor proteins  
1415 during axon growth and maintenance. *Neur Dev* 8, 17 --  
1416 <http://www.neuraldevelopment.com/content/8/1/17>
- 1417 Prokop, A. (2016). Fruit flies in biological research. *Biological Sciences Review* 28, 10-14 --  
1418 <https://tinyurl.com/ybvpoqmw>
- 1419 Prokop, A. (2018). Why funding fruit fly research is important for the biomedical sciences. *Open Access*  
1420 *Govern* 20, 198-201 -- <https://tinyurl.com/y7b25jpm>
- 1421 Prokop, A., Beaven, R., Qu, Y., Sánchez-Soriano, N. (2013). Using fly genetics to dissect the cytoskeletal  
1422 machinery of neurons during axonal growth and maintenance. *J. Cell Sci.* 126, 2331-41 --  
1423 <http://dx.doi.org/10.1242/jcs.126912>
- 1424 Prokop, A., Küppers-Munther, B., Sánchez-Soriano, N. (2012). Using primary neuron cultures of  
1425 *Drosophila* to analyse neuronal circuit formation and function. In "The making and un-making of  
1426 neuronal circuits in *Drosophila*" (B. A. Hassan, Ed.), Vol. 69, pp. 225-47. Humana Press, New York --  
1427 <http://www.springerlink.com/content/t07618161235u475/#section=1102403&page=1>
- 1428 Prokop, A., Uhler, J., Roote, J., Bate, M. C. (1998). The *kakapo* mutation affects terminal arborisation and  
1429 central dendritic sprouting of *Drosophila* motoneurons. *J. Cell Biol.* 143, 1283-1294 --  
1430 <http://jcb.rupress.org/content/143/5/1283.long>
- 1431 Pronker, M. F., Lemstra, S., Snijder, J., Heck, A. J. R., Thies-Weesie, D. M. E., Pasterkamp, R. J.,  
1432 Janssen, B. J. C. (2016). Structural basis of myelin-associated glycoprotein adhesion and signalling.  
1433 *Nature Communications* 7, 13584 -- <https://doi.org/10.1038/ncomms13584>
- 1434 Qiang, L., Sun, X., Austin, T. O., Muralidharan, H., Jean, D. C., Liu, M., Yu, W., Baas, P. W. (2018). Tau  
1435 does not stabilize axonal microtubules but rather enables them to have long labile domains. *Curr Biol*  
1436 28, 2181-2189 e4 -- <http://www.ncbi.nlm.nih.gov/pubmed/30008334>
- 1437 Qiang, L., Yu, W., Andreadis, A., Luo, M., Baas, P. W. (2006). Tau protects microtubules in the axon from  
1438 severing by katanin. *J Neurosci* 26, 3120-9 --  
1439 [http://www.ncbi.nlm.nih.gov/entrez/query.fcgi?cmd=Retrieve&db=PubMed&dopt=Citation&list\\_uids=16554463](http://www.ncbi.nlm.nih.gov/entrez/query.fcgi?cmd=Retrieve&db=PubMed&dopt=Citation&list_uids=16554463)
- 1440
- 1441 Qu, Y., Hahn, I., Lees, M., Parkin, J., Voelzmann, A., Dorey, K., Rathbone, A., Friel, C., Allan, V., Okenve  
1442 Ramos, P., Sánchez-Soriano, N., Prokop, A. (2018). Efa6 protects axons and regulates their growth  
1443 and branching through eliminating off-track microtubules at the cortex. *bioRxiv* 10.1101/385658 --  
1444 <https://www.biorxiv.org/content/10.1101/385658v3>
- 1445 Qu, Y., Hahn, I., Webb, S. E. D., Pearce, S. P., Prokop, A. (2017). Periodic actin structures in neuronal  
1446 axons are required to maintain microtubules. *Mol Biol Cell* 28 296-308 --  
1447 <http://www.molbiolcell.org/content/early/2016/11/21/mbc.E16-10-0727>
- 1448 Rajendran, L., Bali, J., Barr, M. M., Court, F. A., Kramer-Albers, E. M., Picou, F., Raposo, G., van der  
1449 Vos, K. E., van Niel, G., Wang, J., Breakefield, X. O. (2014). Emerging roles of extracellular vesicles in  
1450 the nervous system. *J Neurosci* 34, 15482-9 -- <http://www.ncbi.nlm.nih.gov/pubmed/25392515>
- 1451 Rao, M. V., Campbell, J., Yuan, A., Kumar, A., Gotow, T., Uchiyama, Y., Nixon, R. A. (2003). The  
1452 neurofilament middle molecular mass subunit carboxyl-terminal tail domains is essential for the radial  
1453 growth and cytoskeletal architecture of axons but not for regulating neurofilament transport rate. *J Cell*  
1454 *Biol* 163, 1021-31 -- <http://www.ncbi.nlm.nih.gov/pubmed/14662746>
- 1455 Rashedul Kabir, A. M., Wada, S., Inoue, D., Tamura, Y., Kajihara, T., Mayama, H., Sada, K., Kakugo, A.,  
1456 Gong, J. P. (2012). Formation of ring-shaped assembly of microtubules with a narrow size distribution

- 1457 at an air-buffer interface. *Soft Matter* 8, 10863-10867 -- <http://dx.doi.org/10.1039/C2SM26441B>
- 1458 Ray, S., Meyhofer, E., Milligan, R. A., Howard, J. (1993). Kinesin follows the microtubule's protofilament  
1459 axis. *J Cell Biol* 121, 1083-93 -- <http://www.ncbi.nlm.nih.gov/pubmed/8099076>
- 1460 Reinsch, S. S., Mitchison, T. J., Kirschner, M. (1991). Microtubule polymer assembly and transport during  
1461 axonal elongation. *J Cell Biol* 115, 365-79 -- <http://www.ncbi.nlm.nih.gov/pubmed/1717484>
- 1462 Riancho, J., Gonzalo, I., Ruiz-Soto, M., Berciano, J. (2019). Why do motor neurons degenerate?  
1463 Actualization in the pathogenesis of amyotrophic lateral sclerosis. *Neurología* 34, 27-37 --  
1464 [http://www.elsevier.es/en-revista-neurologia-english-edition--495-articulo-why-do-motor-neurons-](http://www.elsevier.es/en-revista-neurologia-english-edition--495-articulo-why-do-motor-neurons-degenerate-S2173580817301633)  
1465 [degenerate-S2173580817301633](http://www.elsevier.es/en-revista-neurologia-english-edition--495-articulo-why-do-motor-neurons-degenerate-S2173580817301633)
- 1466 Riano, E., Martignoni, M., Mancuso, G., Cartelli, D., Crippa, F., Toldo, I., Siciliano, G., Di Bella, D., Taroni,  
1467 F., Bassi, M. T., Cappelletti, G., Rugarli, E. I. (2009). Pleiotropic effects of spastin on neurite growth  
1468 depending on expression levels. *J Neurochem* 108, 1277-88 -- [https://doi-](https://doi-org.manchester.idm.oclc.org/10.1111/j.1471-4159.2009.05875.x)  
1469 [org.manchester.idm.oclc.org/10.1111/j.1471-4159.2009.05875.x](https://doi-org.manchester.idm.oclc.org/10.1111/j.1471-4159.2009.05875.x)
- 1470 Rieusset, J. (2017). Endoplasmic reticulum-mitochondria calcium signaling in hepatic metabolic diseases.  
1471 *Biochim Biophys Acta Mol Cell Res* 1864, 865-876 -- <http://www.ncbi.nlm.nih.gov/pubmed/28064001>
- 1472 Roos, J., Hummel, T., Ng, N., Klämbt, C., Davis, G. W. (2000). *Drosophila* Futsch regulates synaptic  
1473 microtubule organisation and is necessary for synaptic growth. *Neuron* 26, 371-382 --  
1474 [http://www.ncbi.nlm.nih.gov/entrez/query.fcgi?cmd=Retrieve&db=PubMed&dopt=Citation&list\\_uids=10](http://www.ncbi.nlm.nih.gov/entrez/query.fcgi?cmd=Retrieve&db=PubMed&dopt=Citation&list_uids=10839356)  
1475 [839356](http://www.ncbi.nlm.nih.gov/entrez/query.fcgi?cmd=Retrieve&db=PubMed&dopt=Citation&list_uids=10839356)
- 1476 Roossien, D. H., Lamoureux, P., Miller, K. E. (2014). Cytoplasmic dynein pushes the cytoskeletal  
1477 meshwork forward during axonal elongation. *J Cell Sci* 127, 3593-602 --  
1478 <http://www.ncbi.nlm.nih.gov/pubmed/24951117>
- 1479 Roossien, D. H., Lamoureux, P., Van Vactor, D., Miller, K. E. (2013). *Drosophila* growth cones advance  
1480 by forward translocation of the neuronal cytoskeletal meshwork *in vivo*. *PLoS One* 8, e80136 --  
1481 <http://www.ncbi.nlm.nih.gov/pubmed/24244629>
- 1482 Roote, J., Prokop, A. (2013). How to design a genetic mating scheme: a basic training package for  
1483 *Drosophila* genetics. *G3 (Bethesda)* 3, 353-8 -- <http://www.g3journal.org/content/3/2/353.full>
- 1484 Rosenberg, K. J., Ross, J. L., Feinstein, H. E., Feinstein, S. C., Israelachvili, J. (2008). Complementary  
1485 dimerization of microtubule-associated tau protein: Implications for microtubule bundling and tau-  
1486 mediated pathogenesis. *Proc Natl Acad Sci U S A* 105, 7445-50 --  
1487 <http://www.ncbi.nlm.nih.gov/pubmed/18495933>
- 1488 Sakaguchi, T., Okada, M., Kitamura, T., Kawasaki, K. (1993). Reduced diameter and conduction velocity  
1489 of myelinated fibers in the sciatic nerve of a neurofilament-deficient mutant quail. *Neurosci Lett* 153,  
1490 65-8 -- <http://www.ncbi.nlm.nih.gov/pubmed/8510825>
- 1491 Sakakibara, A., Ando, R., Sapir, T., Tanaka, T. (2013). Microtubule dynamics in neuronal morphogenesis.  
1492 *Open Biology* 3, 130061 -- <https://royalsocietypublishing.org/doi/abs/10.1098/rsob.130061>
- 1493 Salvadores, N., Sanhueza, M., Manque, P., Court, F. A. (2017). Axonal degeneration during aging and its  
1494 functional role in neurodegenerative disorders. *Front Neurosci* 11 --  
1495 <https://www.frontiersin.org/article/10.3389/fnins.2017.00451>
- 1496 Samsonov, A., Yu, J. Z., Rasenick, M., Popov, S. V. (2004). Tau interaction with microtubules *in vivo*. *J*  
1497 *Cell Sci* 117, 6129-41 -- <http://www.ncbi.nlm.nih.gov/pubmed/15564376>
- 1498 Sánchez-Soriano, N., Gonçalves-Pimentel, C., Beaven, R., Haessler, U., Ofner, L., Ballestrém, C.,  
1499 Prokop, A. (2010). *Drosophila* growth cones: a genetically tractable platform for the analysis of axonal  
1500 growth dynamics. *Dev. Neurobiol.* 70, 58-71 --  
1501 <https://onlinelibrary.wiley.com/doi/abs/10.1002/dneu.20762>
- 1502 Sánchez-Soriano, N., Tear, G., Whittington, P., Prokop, A. (2007). *Drosophila* as a genetic and cellular  
1503 model for studies on axonal growth. *Neural Develop* 2, 9 -- <https://tinyurl.com/y3yjg8u4>
- 1504 Sánchez-Soriano, N., Travis, M., Dajas-Bailador, F., Gonçalves-Pimentel, C., Whitmarsh, A. J., Prokop,  
1505 A. (2009). Mouse ACF7 and *Drosophila* Short stop modulate filopodia formation and microtubule  
1506 organisation during neuronal growth. *J Cell Sci* 122, 2534-42 --  
1507 <http://jcs.biologists.org/content/122/14/2534.long>
- 1508 Satake, T., Yamashita, K., Hayashi, K., Miyatake, S., Tamura-Nakano, M., Doi, H., Furuta, Y., Shioi, G.,  
1509 Miura, E., Takeo, Y. H., Yoshida, K., Yahikozawa, H., Matsumoto, N., Yuzaki, M., Suzuki, A. (2017).  
1510 MTCL1 plays an essential role in maintaining Purkinje neuron axon initial segment. *EMBO J* 36, 1227-  
1511 1242 -- <http://emboj.embopress.org/content/embojnl/36/9/1227.full>
- 1512 Savage, C., Hamelin, M., Culotti, J. G., Coulson, A., Albertson, D. G., Chalfie, M. (1989). *mec-7* is a beta-  
1513 tubulin gene required for the production of 15-prot filament microtubules in *Caenorhabditis elegans*.



- 1514 Genes Dev 3, 870-81 -- <http://www.ncbi.nlm.nih.gov/pubmed/2744465>
- 1515 Saxton, W. M., Hollenbeck, P. J. (2012). The axonal transport of mitochondria. *J Cell Sci* 125, 2095-104 --
- 1516 <http://www.ncbi.nlm.nih.gov/pubmed/22619228>
- 1517 Sayas, C. L., Tortosa, E., Bollati, F., Ramirez-Rios, S., Arnal, I., Avila, J. (2015). Tau regulates the
- 1518 localization and function of End-binding proteins 1 and 3 in developing neuronal cells. *J Neurochem*
- 1519 133, 653-67 -- <http://www.ncbi.nlm.nih.gov/pubmed/25761518>
- 1520 Scaife, R., Margolis, R. L. (1990). Biochemical and immunochemical analysis of rat brain dynamin
- 1521 interaction with microtubules and organelles *in vivo* and *in vitro*. *J Cell Biol* 111, 3023-33 --
- 1522 <http://www.ncbi.nlm.nih.gov/pubmed/2148566>
- 1523 Schaedel, L., John, K., Gaillard, J., Nachury, M. V., Blanchoin, L., Thery, M. (2015). Microtubules self-
- 1524 repair in response to mechanical stress. *Nat Mater* 14, 1156-63 --
- 1525 <http://www.ncbi.nlm.nih.gov/pubmed/26343914>
- 1526 Schelski, M., Bradke, F. (2017). Neuronal polarization: From spatiotemporal signaling to cytoskeletal
- 1527 dynamics. *Mol Cell Neurosci* 84, 11-28 -- <http://www.ncbi.nlm.nih.gov/pubmed/28363876>
- 1528 Schüle, R., Wiethoff, S., Martus, P., Karle, K. N., Otto, S., Klebe, S., Klimpe, S., Gallenmüller, C.,
- 1529 Kurzwelly, D., Henkel, D., Rimmele, F., Stolze, H., Kohl, Z., Kassubek, J., Klockgether, T., Vielhaber,
- 1530 S., Kamm, C., Klopstock, T., Bauer, P., Züchner, S., Liepelt-Scarfone, I., Schöls, L. (2016). Hereditary
- 1531 spastic paraplegia: Clinicogenetic lessons from 608 patients. *Annals of Neurology* 79, 646-658 --
- 1532 <https://onlinelibrary.wiley.com/doi/abs/10.1002/ana.24611>
- 1533 Sharp, D. J., Ross, J. L. (2012). Microtubule-severing enzymes at the cutting edge. *J Cell Sci* 125, 2561-9
- 1534 -- <http://www.ncbi.nlm.nih.gov/pubmed/22595526>
- 1535 Shaw, G., Bray, D. (1977). Movement and extension of isolated growth cones. *Exp Cell Res* 104, 55-62 --
- 1536 [http://www.ncbi.nlm.nih.gov/entrez/query.fcgi?cmd=Retrieve&db=PubMed&dopt=Citation&list\\_uids=55](http://www.ncbi.nlm.nih.gov/entrez/query.fcgi?cmd=Retrieve&db=PubMed&dopt=Citation&list_uids=556695)
- 1537 [6695](http://www.ncbi.nlm.nih.gov/entrez/query.fcgi?cmd=Retrieve&db=PubMed&dopt=Citation&list_uids=556695)
- 1538 Sheng, Z. H. (2017). The interplay of axonal energy homeostasis and mitochondrial trafficking and
- 1539 anchoring. *Trends Cell Biol* 27, 403-416 -- <http://www.ncbi.nlm.nih.gov/pubmed/28228333>
- 1540 Shigeoka, T., Koppers, M., Wong, H. H.-W., Lin, J. Q., Dwivedy, A., Nascimento, J. d. F., Cagnetta, R.,
- 1541 van Tartwijk, F., Strohl, F., Cioni, J.-M., Carrington, M., Kaminski, C. F., Harris, W. A., Jung, H., Holt,
- 1542 C. E. (2018). On-site ribosome remodeling by locally synthesized ribosomal proteins in axons. *bioRxiv*,
- 1543 500033 -- <https://www.biorxiv.org/content/biorxiv/early/2018/12/19/500033.full>
- 1544 Shin, S., Lim, S., Jeong, H., Kwan, L., Kim, Y. (2018). Visualization of tau-tubulin interaction in a living
- 1545 cell using bifluorescence complementation technique. *International Journal of Molecular Sciences* 19,
- 1546 2978 -- <http://www.mdpi.com/1422-0067/19/10/2978>
- 1547 Shin, S. C., Im, S.-K., Jang, E.-H., Jin, K. S., Hur, E.-M., Kim, E. E. (2019). Structural and molecular basis
- 1548 for katanin-mediated severing of glutamylated microtubules. *Cell Reports* 26, 1357-1367.e5 --
- 1549 <https://doi.org/10.1016/j.celrep.2019.01.020>
- 1550 Shoukier, M., Neesen, J., Sauter, S. M., Argyriou, L., Doerwald, N., Pantakani, D. V., Mannan, A. U.
- 1551 (2009). Expansion of mutation spectrum, determination of mutation cluster regions and predictive
- 1552 structural classification of SPAST mutations in hereditary spastic paraplegia. *Eur J Hum Genet* 17,
- 1553 187-94 -- <http://www.ncbi.nlm.nih.gov/pubmed/18701882>
- 1554 Shpetner, H. S., Vallee, R. B. (1989). Identification of dynamin, a novel mechanochemical enzyme that
- 1555 mediates interactions between microtubules. *Cell* 59, 421-32 --
- 1556 <http://www.ncbi.nlm.nih.gov/pubmed/2529977>
- 1557 Sirajuddin, M., Rice, L. M., Vale, R. D. (2014). Regulation of microtubule motors by tubulin isoforms and
- 1558 post-translational modifications. *Nat Cell Biol* 16, 335-344 -- <http://dx.doi.org/10.1038/ncb2920>
- 1559 Skruber, K., Read, T.-A., Vitriol, E. A. (2018). Reconsidering an active role for G-actin in cytoskeletal
- 1560 regulation. *J Cell Sci* 131 -- <http://jcs.biologists.org/content/joces/131/1/jcs203760.full>
- 1561 Smith, D. H., Nonaka, M., Miller, R., Leoni, M., Chen, X. H., Alsop, D., Meaney, D. F. (2000). Immediate
- 1562 coma following inertial brain injury dependent on axonal damage in the brainstem. *J Neurosurg* 93,
- 1563 315-22 -- <http://www.ncbi.nlm.nih.gov/pubmed/10930019>
- 1564 Solowska, J. M., Baas, P. W. (2015). Hereditary spastic paraplegia SPG4: what is known and not known
- 1565 about the disease. *Brain* 138, 2471-84 -- <http://www.ncbi.nlm.nih.gov/pubmed/26094131>
- 1566 Song, Y., Kirkpatrick, L. L., Schilling, A. B., Helseth, D. L., Chabot, N., Keillor, J. W., Johnson, G. V.,
- 1567 Brady, S. T. (2013). Transglutaminase and polyamination of tubulin: posttranslational modification for
- 1568 stabilizing axonal microtubules. *Neuron* 78, 109-23 -- <http://www.ncbi.nlm.nih.gov/pubmed/23583110>
- 1569 Song, Y., Li, D., Farrelly, O., Miles, L., Li, F., Kim, S. E., Lo, T. Y., Wang, F., Li, T., Thompson-Peer, K. L.,

- 1570 Gong, J., Murthy, S. E., Coste, B., Yakubovich, N., Patapoutian, A., Xiang, Y., Rompolas, P., Jan, L.  
1571 Y., Jan, Y. N. (2019). The mechanosensitive ion channel Piezo inhibits axon regeneration. *Neuron*  
1572 102, 373-389 e6 -- <http://www.ncbi.nlm.nih.gov/pubmed/30819546>
- 1573 Soppina, V., Herbstman, J. F., Skiniotis, G., Verhey, K. J. (2012). Luminal localization of alpha-tubulin  
1574 K40 acetylation by cryo-EM analysis of fab-labeled microtubules. *PLoS One* 7, e48204 --  
1575 <http://www.ncbi.nlm.nih.gov/pubmed/23110214>
- 1576 Sorbara, C. D., Wagner, N. E., Ladwig, A., Nikic, I., Merkler, D., Kleele, T., Marinkovic, P., Naumann, R.,  
1577 Godinho, L., Bareyre, F. M., Bishop, D., Misgeld, T., Kerschensteiner, M. (2014). Pervasive axonal  
1578 transport deficits in multiple sclerosis models. *Neuron* 84, 1183-90 --  
1579 <http://www.ncbi.nlm.nih.gov/pubmed/25433639>
- 1580 Staff, N. P., Podratz, J. L., Grassner, L., Bader, M., Paz, J., Knight, A. M., Loprinzi, C. L., Trushina, E.,  
1581 Windebank, A. J. (2013). Bortezomib alters microtubule polymerization and axonal transport in rat  
1582 dorsal root ganglion neurons. *Neurotoxicology* 39, 124-31 --  
1583 <http://www.ncbi.nlm.nih.gov/pubmed/24035926>
- 1584 Stewart, A., Tsubouchi, A., Rolls, M. M., Tracey, W. D., Sherwood, N. T. (2012). Katanin p60-like1  
1585 promotes microtubule growth and terminal dendrite stability in the larval class IV sensory neurons of  
1586 *Drosophila*. *The Journal of Neuroscience* 32, 11631-11642 --  
1587 <http://www.jneurosci.org/content/jneuro/32/34/11631.full>
- 1588 Stokin, G. B., Almenar-Queralt, A., Gunawardena, S., Rodrigues, E. M., Falzone, T., Kim, J., Lillo, C.,  
1589 Mount, S. L., Roberts, E. A., McGowan, E., Williams, D. S., Goldstein, L. S. (2008). Amyloid precursor  
1590 protein-induced axonopathies are independent of amyloid-beta peptides. *Hum Mol Genet* 17, 3474-86  
1591 -- <http://www.ncbi.nlm.nih.gov/pubmed/18694898>
- 1592 Stokin, G. B., Lillo, C., Falzone, T. L., Bruschi, R. G., Rockenstein, E., Mount, S. L., Raman, R., Davies,  
1593 P., Masliah, E., Williams, D. S., Goldstein, L. S. (2005). Axonopathy and transport deficits early in the  
1594 pathogenesis of Alzheimer's disease. *Science* 307, 1282-8 --  
1595 <http://www.ncbi.nlm.nih.gov/pubmed/15731448>
- 1596 Stone, M. C., Rao, K., Gheres, K. W., Kim, S., Tao, J., La Rochelle, C., Folker, C. T., Sherwood, N. T.,  
1597 Rolls, M. M. (2012). Normal spastin gene dosage is specifically required for axon regeneration. *Cell*  
1598 *Rep* 2, 1340-50 -- <http://www.ncbi.nlm.nih.gov/pubmed/23122959>
- 1599 Stroud, M. J., Nazgiewicz, A., McKenzie, E. A., Wang, Y., Kammerer, R. A., Ballestrem, C. (2014). GAS2-  
1600 like proteins mediate communication between microtubules and actin through interactions with end-  
1601 binding proteins. *J Cell Sci* 127, 2672-82 -- <http://www.ncbi.nlm.nih.gov/pubmed/24706950>
- 1602 Sturgill, E. G., Ohi, R. (2013). Microtubule-regulating kinesins. *Current Biology* 23, R946-R948 --  
1603 <http://www.sciencedirect.com/science/article/pii/S0960982213009883>
- 1604 Sturrock, R. R. (1987). Age-related changes in the number of myelinated axons and glial cells in the  
1605 anterior and posterior limbs of the mouse anterior commissure. *J Anat* 150, 111-127 --  
1606 <https://www.ncbi.nlm.nih.gov/pubmed/3654327>
- 1607 Subramaniyan Parimalam, S., Tarhan, M. C., Karsten, S. L., Fujita, H., Shintaku, H., Kotera, H.,  
1608 Yokokawa, R. (2016). On-chip microtubule gliding assay for parallel measurement of tau protein  
1609 species. *Lab on a Chip* 16, 1691-1697 -- <http://dx.doi.org/10.1039/C5LC01486G>
- 1610 Sudo, H., Baas, P. W. (2010). Acetylation of microtubules influences their sensitivity to severing by  
1611 katanin in neurons and fibroblasts. *J Neurosci* 30, 7215-26 --  
1612 <http://www.ncbi.nlm.nih.gov/pubmed/20505088>
- 1613 Sumino, Y., Nagai, K. H., Shitaka, Y., Tanaka, D., Yoshikawa, K., Chate, H., Oiwa, K. (2012). Large-scale  
1614 vortex lattice emerging from collectively moving microtubules. *Nature* 483, 448-52 --  
1615 <http://www.ncbi.nlm.nih.gov/pubmed/22437613>
- 1616 Takei, Y., Teng, J., Harada, A., Hirokawa, N. (2000). Defects in axonal elongation and neuronal migration  
1617 in mice with disrupted *tau* and *map1b* genes. *J. Cell Biol.* 150, 989-1000 --  
1618 [http://www.ncbi.nlm.nih.gov/entrez/query.fcgi?cmd=Retrieve&db=PubMed&dopt=Citation&list\\_uids=10973990](http://www.ncbi.nlm.nih.gov/entrez/query.fcgi?cmd=Retrieve&db=PubMed&dopt=Citation&list_uids=10973990)
- 1619
- 1620 Tang-Schomer, M. D., Johnson, V. E., Baas, P. W., Stewart, W., Smith, D. H. (2012). Partial interruption  
1621 of axonal transport due to microtubule breakage accounts for the formation of periodic varicosities  
1622 after traumatic axonal injury. *Exp Neurol* 233, 364-72 --  
1623 <http://www.ncbi.nlm.nih.gov/pubmed/22079153>
- 1624 Tao, J., Feng, C., Rolls, M. M. (2016). The microtubule-severing protein fidgetin acts after dendrite injury  
1625 to promote their degeneration. *J Cell Sci* 129, 3274-81 --  
1626 <http://www.ncbi.nlm.nih.gov/pubmed/27411367>

- 1627 Tarrade, A., Fassier, C., Courageot, S., Charvin, D., Vitte, J., Peris, L., Thorel, A., Mouisel, E.,  
1628 Fonknechten, N., Roblot, N., Seilhean, D., Dierich, A., Hauw, J. J., Melki, J. (2006). A mutation of  
1629 spastin is responsible for swellings and impairment of transport in a region of axon characterized by  
1630 changes in microtubule composition. *Hum Mol Genet* 15, 3544-58 --  
1631 <http://www.ncbi.nlm.nih.gov/pubmed/17101632>
- 1632 Tas, R. P., Chazeau, A., Cloin, B. M. C., Lambers, M. L. A., Hoogenraad, C. C., Kapitein, L. C. (2017).  
1633 Differentiation between oppositely oriented microtubules controls polarized neuronal transport. *Neuron*  
1634 -- <https://www.sciencedirect.com/science/article/pii/S0896627317310711>
- 1635 Tas, R. P., Kapitein, L. C. (2018). Exploring cytoskeletal diversity in neurons. *Science* 361, 231-232 --  
1636 <https://science.sciencemag.org/content/sci/361/6399/231.full>
- 1637 Tedeschi, A., Bradke, F. (2016). Spatial and temporal arrangement of neuronal intrinsic and extrinsic  
1638 mechanisms controlling axon regeneration. *Curr Opin Neurobiol* 42, 118-127 --  
1639 <http://www.ncbi.nlm.nih.gov/pubmed/28039763>
- 1640 Ti, S.-C., Alushin, G. M., Kapoor, T. M. (2018). Human  $\beta$ -tubulin isoforms can regulate microtubule  
1641 protofilament number and stability. *Developmental Cell* 47, 175-190.e5 --  
1642 <http://www.sciencedirect.com/science/article/pii/S1534580718306841>
- 1643 Tint, I., Jean, D., Baas, P. W., Black, M. M. (2009). Doublecortin associates with microtubules  
1644 preferentially in regions of the axon displaying actin-rich protrusive structures. *J Neurosci* 29, 10995-  
1645 1010 --  
1646 [http://www.ncbi.nlm.nih.gov/entrez/query.fcgi?cmd=Retrieve&db=PubMed&dopt=Citation&list\\_uids=19726658](http://www.ncbi.nlm.nih.gov/entrez/query.fcgi?cmd=Retrieve&db=PubMed&dopt=Citation&list_uids=19726658)
- 1648 Triclin, S., Inoue, D., Gaillard, J., Htet, Z. M., De Santis, M., Portran, D., Derivery, E., Aumeier, C.,  
1649 Schaedel, L., John, K., Leterrier, C., Reck-Peterson, S., Blanchoin, L., Thery, M. (2018). Self-repair  
1650 protects microtubules from their destruction by molecular motors. *bioRxiv*, 499020 --  
1651 <https://www.biorxiv.org/content/biorxiv/early/2018/12/17/499020.full>
- 1652 Trinczek, B., Ebner, A., Mandelkow, E. M., Mandelkow, E. (1999). Tau regulates the  
1653 attachment/detachment but not the speed of motors in microtubule-dependent transport of single  
1654 vesicles and organelles. *J Cell Sci* 112, 2355-2367 --  
1655 <http://jcs.biologists.org/content/joces/112/14/2355.full>
- 1656 Turney, S. G., Ahmed, M., Chandrasekar, I., Wysolmerski, R. B., Goekeler, Z. M., Rioux, R. M.,  
1657 Whitesides, G. M., Bridgman, P. C. (2016). Nerve growth factor stimulates axon outgrowth through  
1658 negative regulation of growth cone actomyosin restraint of microtubule advance. *Mol Biol Cell* 27, 500-  
1659 17 -- <http://www.molbiolcell.org/content/early/2015/11/29/mbc.E15-09-0636.abstract>
- 1660 Tymanskyj, S. R., Yang, B., Falnikar, A., Lepore, A. C., Ma, L. (2017). MAP7 regulates axon collateral  
1661 branch development in dorsal root ganglion neurons. *J Neurosci* 37, 1648-1661 --  
1662 <http://www.ncbi.nlm.nih.gov/pubmed/28069923>
- 1663 Valenstein, M. L., Roll-Mecak, A. (2016). Graded control of microtubule severing by tubulin glutamylation.  
1664 *Cell* 164, 911-21 --  
1665 <https://www.sciencedirect.com/science/article/pii/S0092867416000593?via%3Dihub>
- 1666 van der Vaart, B., van Riel, Wilhelmina E., Doodhi, H., Kevenaar, Josta T., Katrukha, Eugene A., Gumy,  
1667 L., Bouchet, Benjamin P., Grigoriev, I., Spangler, Samantha A., Yu, Ka L., Wulf, Phebe S., Wu, J.,  
1668 Lansbergen, G., van Battum, Eljo Y., Pasterkamp, R. J., Mimori-Kiyosue, Y., Demmers, J., Olieric, N.,  
1669 Maly, Ivan V., Hoogenraad, Casper C., Akhmanova, A. (2013). CFEOM1-associated kinesin KIF21A is  
1670 a cortical microtubule growth inhibitor. *Developmental Cell* 27, 145-160 --  
1671 <http://dx.doi.org/10.1016/j.devcel.2013.09.010>
- 1672 van Haren, J., Wittmann, T. (2019). Microtubule plus end dynamics – do we know how microtubules  
1673 grow? *BioEssays* 41, 1800194 -- <https://onlinelibrary.wiley.com/doi/abs/10.1002/bies.201800194>
- 1674 VanDelinder, V., Adams, P. G., Bachand, G. D. (2016a). Mechanical splitting of microtubules into  
1675 protofilament bundles by surface-bound kinesin-1. *Sci Rep* 6, 39408 --  
1676 <http://www.ncbi.nlm.nih.gov/pubmed/28000714>
- 1677 VanDelinder, V., Brener, S., Bachand, G. D. (2016b). Mechanisms underlying the active self-assembly of  
1678 microtubule rings and spools. *Biomacromolecules* 17, 1048-56 --  
1679 <http://www.ncbi.nlm.nih.gov/pubmed/26842978>
- 1680 Vassilopoulos, S., Gibaud, S., Jimenez, A., Caillol, G., Leterrier, C. (2019). Ultrastructure of the axonal  
1681 periodic scaffold reveals a braid-like organization of actin rings. *bioRxiv*, 636217 --  
1682 <https://www.biorxiv.org/content/biorxiv/early/2019/05/13/636217.full>
- 1683 Vemu, A., Atherton, J., Spector, J. O., Moores, C. A., Roll-Mecak, A. (2017). Tubulin isoform composition

- 1684 tunes microtubule dynamics. *Mol Biol Cell* 28, 3564-3572 --  
1685 <http://www.ncbi.nlm.nih.gov/pubmed/29021343>
- 1686 Vemu, A., Szczesna, E., Zehr, E. A., Spector, J. O., Grigorieff, N., Deaconescu, A. M., Roll-Mecak, A.  
1687 (2018). Severing enzymes amplify microtubule arrays through lattice GTP-tubulin incorporation.  
1688 *Science* 361 -- <http://www.ncbi.nlm.nih.gov/pubmed/30139843>
- 1689 Villarroel-Campos, D., Gonzalez-Billault, C. (2014). The MAP1B case: an old MAP that is new again. *Dev*  
1690 *Neurobiol* 74, 953-71 -- <http://www.ncbi.nlm.nih.gov/pubmed/24700609>
- 1691 Voelzmann, A., Hahn, I., Pearce, S., Sánchez-Soriano, N. P., Prokop, A. (2016a). A conceptual view at  
1692 microtubule plus end dynamics in neuronal axons. *Brain Res Bulletin* 126, 226-37 --  
1693 <http://www.sciencedirect.com/science/article/pii/S0361923016301885>
- 1694 Voelzmann, A., Liew, Y.-T., Qu, Y., Hahn, I., Melero, C., Sánchez-Soriano, N., Prokop, A. (2017).  
1695 *Drosophila* Short stop as a paradigm for the role and regulation of spectraplakins. *Sem Cell Dev Biol*  
1696 69, 40-57 -- <http://www.sciencedirect.com/science/article/pii/S1084952117302124>
- 1697 Voelzmann, A., Okenve-Ramos, P., Qu, Y., Chojnowska-Monga, M., del Caño-Espinel, M., Prokop, A.,  
1698 Sánchez-Soriano, N. (2016b). Tau and spectraplakins promote synapse formation and maintenance  
1699 through Jun kinase and neuronal trafficking. *eLife* 5, e14694 --  
1700 <https://elifesciences.org/content/5/e14694>
- 1701 Wada, S., Rashedul Kabir, A. M., Ito, M., Inoue, D., Sada, K., Kakugo, A. (2015). Effect of length and  
1702 rigidity of microtubules on the size of ring-shaped assemblies obtained through active self-  
1703 organization. *Soft Matter* 11, 1151-1157 -- <http://dx.doi.org/10.1039/C4SM02292K>
- 1704 Walczak, C. E., Gayek, S., Ohi, R. (2013). Microtubule-depolymerizing kinesins. *Annu Rev Cell Dev Biol*  
1705 29, 417-41 -- <http://www.ncbi.nlm.nih.gov/pubmed/23875646>
- 1706 Wali, G., Sue, C. M., Mackay-Sim, A. (2018). Patient-Derived Stem Cell Models in SPAST HSP: Disease  
1707 Modelling and Drug Discovery. *Brain Sci* 8 -- <http://www.ncbi.nlm.nih.gov/pubmed/30065201>
- 1708 Wali, G., Sutharsan, R., Fan, Y., Stewart, R., Tello Velasquez, J., Sue, C. M., Crane, D. I., Mackay-Sim,  
1709 A. (2016). Mechanism of impaired microtubule-dependent peroxisome trafficking and oxidative stress  
1710 in SPAST-mutated cells from patients with Hereditary Spastic Paraplegia. *Sci Rep* 6, 27004 --  
1711 <https://doi.org/10.1038/srep27004>
- 1712 Wang, J. T., Medress, Z. A., Barres, B. A. (2012). Axon degeneration: molecular mechanisms of a self-  
1713 destruction pathway. *J Cell Biol* 196, 7-18 -- <http://www.ncbi.nlm.nih.gov/pubmed/22232700>
- 1714 Waterman-Storer, C. M., Salmon, E. D. (1997). Actomyosin-based retrograde flow of microtubules in the  
1715 lamella of migrating epithelial cells influences microtubule dynamic instability and turnover and is  
1716 associated with microtubule breakage and treadmilling. *J Cell Biol* 139, 417-34 --  
1717 [http://www.ncbi.nlm.nih.gov/entrez/query.fcgi?cmd=Retrieve&db=PubMed&dopt=Citation&list\\_uids=9334345](http://www.ncbi.nlm.nih.gov/entrez/query.fcgi?cmd=Retrieve&db=PubMed&dopt=Citation&list_uids=9334345)
- 1718 34345
- 1719 Weiss, D., Langford, G., Seitz-Tutter, D., Maile, W. (1991). Analysis of the gliding, fishtailing and circling  
1720 motions of native microtubules. *Acta Histochem Suppl.* 41, 81-105
- 1721 Wilson, C., Gonzalez-Billault, C. (2015). Regulation of cytoskeletal dynamics by redox signaling and  
1722 oxidative stress: implications for neuronal development and trafficking. *Front Cell Neurosci* 9, 381 --  
1723 <http://www.ncbi.nlm.nih.gov/pubmed/26483635>
- 1724 Winckler, B., Faundez, V., Maday, S., Cai, Q., Guimas Almeida, C., Zhang, H. (2018). The  
1725 endolysosomal system and proteostasis: from development to degeneration. *J Neurosci* 38, 9364-  
1726 9374 -- <http://www.ncbi.nlm.nih.gov/pubmed/30381428>
- 1727 Winding, M., Kelliher, M. T., Lu, W., Wildonger, J., Gelfand, V. I. (2016). Role of kinesin-1-based  
1728 microtubule sliding in *Drosophila* nervous system development. *Proc Natl Acad Sci U S A* 113, E4985-  
1729 94 -- <http://www.ncbi.nlm.nih.gov/pubmed/27512046>
- 1730 Wood, J. D., Landers, J. A., Bingley, M., McDermott, C. J., Thomas-McArthur, V., Gleadall, L. J., Shaw,  
1731 P. J., Cunliffe, V. T. (2006). The microtubule-severing protein Spastin is essential for axon outgrowth  
1732 in the zebrafish embryo. *Hum Mol Genet* 15, 2763-71 --  
1733 [http://www.ncbi.nlm.nih.gov/entrez/query.fcgi?cmd=Retrieve&db=PubMed&dopt=Citation&list\\_uids=16893913](http://www.ncbi.nlm.nih.gov/entrez/query.fcgi?cmd=Retrieve&db=PubMed&dopt=Citation&list_uids=16893913)
- 1734 893913
- 1735 Wortman, J. C., Shrestha, U. M., Barry, D. M., Garcia, M. L., Gross, S. P., Yu, C. C. (2014). Axonal  
1736 transport: how high microtubule density can compensate for boundary effects in small-caliber axons.  
1737 *Biophys J* 106, 813-23 -- [https://www.cell.com/biophysj/fulltext/S0006-3495\(14\)00075-7](https://www.cell.com/biophysj/fulltext/S0006-3495(14)00075-7)
- 1738 Wozniak, K. M., Vornov, J. J., Wu, Y., Liu, Y., Carozzi, V. A., Rodriguez-Menendez, V., Ballarini, E.,  
1739 Alberti, P., Pozzi, E., Semperboni, S., Cook, B. M., Littlefield, B. A., Nomoto, K., Condon, K., Eckley,

- 1740 S., DesJardins, C., Wilson, L., Jordan, M. A., Feinstein, S. C., Cavaletti, G., Polydefkis, M., Slusher, B.  
1741 S. (2018). Peripheral Neuropathy Induced by Microtubule-Targeted Chemotherapies: Insights into  
1742 Acute Injury and Long-term Recovery. *Cancer Res* 78, 817-829 --  
1743 <http://www.ncbi.nlm.nih.gov/pubmed/29191802>
- 1744 Wu, Y., Li, J., Zhou, J., Feng, Y. (2014). Dynamic long-term microstructural and ultrastructural alterations  
1745 in sensory nerves of rats of paclitaxel-induced neuropathic pain. *Chin Med J (Engl)* 127, 2945-52 --  
1746 <http://www.ncbi.nlm.nih.gov/pubmed/25131233>
- 1747 Wu, Y., Whiteus, C., Xu, C. S., Hayworth, K. J., Weinberg, R. J., Hess, H. F., De Camilli, P. (2017).  
1748 Contacts between the endoplasmic reticulum and other membranes in neurons. *Proc Natl Acad Sci U*  
1749 *S A* 114, E4859-e4867 -- <https://www.pnas.org/content/114/24/E4859.short>
- 1750 Wylie, S. R., Chantler, P. D. (2008). Myosin IIC: a third molecular motor driving neuronal dynamics. *Mol*  
1751 *Biol Cell* 19, 3956-68 -- <http://www.ncbi.nlm.nih.gov/pubmed/18614800>
- 1752 Xu, K., Zhong, G., Zhuang, X. (2013). Actin, Spectrin, and associated proteins form a periodic  
1753 cytoskeletal structure in axons. *Science* 339, 452-6 -- <http://www.ncbi.nlm.nih.gov/pubmed/23239625>
- 1754 Xu, Z., Schaedel, L., Portran, D., Aguilar, A., Gaillard, J., Marinkovich, M. P., Théry, M., Nachury, M. V.  
1755 (2017). Microtubules acquire resistance from mechanical breakage through intraluminal acetylation.  
1756 *Science* 356, 328-332 -- <http://science.sciencemag.org/content/sci/356/6335/328.full>
- 1757 Yamasaki, H., Itakura, C., Mizutani, M. (1991). Hereditary hypotrophic axonopathy with neurofilament  
1758 deficiency in a mutant strain of the Japanese quail. *Acta Neuropathol* 82, 427-34 --  
1759 <http://www.ncbi.nlm.nih.gov/pubmed/1785256>
- 1760 Yan, C., Wang, F., Peng, Y., Williams, C. R., Jenkins, B., Wildonger, J., Kim, H. J., Perr, J. B., Vaughan,  
1761 J. C., Kern, M. E., Falvo, M. R., O'Brien, E. T., 3rd, Superfine, R., Tuthill, J. C., Xiang, Y., Rogers, S.  
1762 L., Parrish, J. Z. (2018). Microtubule acetylation is required for mechanosensation in *Drosophila*. *Cell*  
1763 *Rep* 25, 1051-1065 e6 -- <http://www.ncbi.nlm.nih.gov/pubmed/30355484>
- 1764 Yap, A. S., Duszyc, K., Viasnoff, V. (2018). Mechanosensing and Mechanotransduction at Cell-Cell  
1765 Junctions. *Cold Spring Harb Perspect Biol* 10 -- <http://www.ncbi.nlm.nih.gov/pubmed/28778874>
- 1766 Yaron, A., Schuldiner, O. (2016). Common and divergent mechanisms in developmental neuronal  
1767 remodeling and dying back neurodegeneration. *Curr Biol* 26, R628-39 --  
1768 <http://www.ncbi.nlm.nih.gov/pubmed/27404258>
- 1769 Yau, K. W., van Beuningen, S. F., Cunha-Ferreira, I., Cloin, B. M., van Battum, E. Y., Will, L., Schatzle,  
1770 P., Tas, R. P., van Krugten, J., Katrukha, E. A., Jiang, K., Wulf, P. S., Mikhaylova, M., Harterink, M.,  
1771 Pasterkamp, R. J., Akhmanova, A., Kapitein, L. C., Hoogenraad, C. C. (2014). Microtubule minus-end  
1772 binding protein CAMSAP2 controls axon specification and dendrite development. *Neuron* 82, 1058-73  
1773 -- <http://www.ncbi.nlm.nih.gov/pubmed/24908486>
- 1774 Yin, X., Kidd, G. J., Ohno, N., Perkins, G. A., Ellisman, M. H., Bastian, C., Brunet, S., Baltan, S., Trapp, B.  
1775 D. (2016). Proteolipid protein-deficient myelin promotes axonal mitochondrial dysfunction via altered  
1776 metabolic coupling. *J Cell Biol* 215, 531-542 -- <http://www.ncbi.nlm.nih.gov/pubmed/27872255>
- 1777 Yu, W., Qiang, L., Solowska, J. M., Karabay, A., Korulu, S., Baas, P. W. (2008). The microtubule-severing  
1778 proteins spastin and katanin participate differently in the formation of axonal branches. *Mol Biol Cell*  
1779 19, 1485-98 --  
1780 [http://www.ncbi.nlm.nih.gov/entrez/query.fcgi?cmd=Retrieve&db=PubMed&dopt=Citation&list\\_uids=18234839](http://www.ncbi.nlm.nih.gov/entrez/query.fcgi?cmd=Retrieve&db=PubMed&dopt=Citation&list_uids=18234839)  
1781
- 1782 Zala, D., Hinckelmann, M.-V., Yu, H., da Cunha, L., Menezes, M., Liot, G., Cordelières, Fabrice P.,  
1783 Marco, S., Saudou, F. (2013). Vesicular glycolysis provides on-board energy for fast axonal transport.  
1784 *Cell* 152, 479-491 -- <http://www.sciencedirect.com/science/article/pii/S0092867412015516>
- 1785 Zanic, M., Widlund, P. O., Hyman, A. A., Howard, J. (2013). Synergy between XMAP215 and EB1  
1786 increases microtubule growth rates to physiological levels. *Nat Cell Biol* 15, 688-693 --  
1787 <http://dx.doi.org/10.1038/ncb2744>  
1788 <http://www.nature.com/ncb/journal/vaop/ncurrent/abs/ncb2744.html#supplementary-information>
- 1789 Zempel, H., Mandelkow, E. M. (2015). Tau missorting and spastin-induced microtubule disruption in  
1790 neurodegeneration: Alzheimer Disease and Hereditary Spastic Paraplegia. *Mol Neurodegener* 10, 68 -  
1791 - <http://www.ncbi.nlm.nih.gov/pubmed/26691836>
- 1792 Zhang, D., Rogers, G. C., Buster, D. W., Sharp, D. J. (2007). Three microtubule severing enzymes  
1793 contribute to the "Pacman-flux" machinery that moves chromosomes. *J Cell Biol* 177, 231-42 --  
1794 [http://www.ncbi.nlm.nih.gov/entrez/query.fcgi?cmd=Retrieve&db=PubMed&dopt=Citation&list\\_uids=17452528](http://www.ncbi.nlm.nih.gov/entrez/query.fcgi?cmd=Retrieve&db=PubMed&dopt=Citation&list_uids=17452528)  
1795
- 1796 Zheng, J., Lamoureux, P., Santiago, V., Dennerll, T., Buxbaum, R. E., Heidemann, S. R. (1991). Tensile

- 1797 regulation of axonal elongation and initiation. *J Neurosci* 11, 1117-25 --  
1798 [http://www.ncbi.nlm.nih.gov/entrez/query.fcgi?cmd=Retrieve&db=PubMed&dopt=Citation&list\\_uids=20](http://www.ncbi.nlm.nih.gov/entrez/query.fcgi?cmd=Retrieve&db=PubMed&dopt=Citation&list_uids=20)  
1799 [10807](http://www.ncbi.nlm.nih.gov/entrez/query.fcgi?cmd=Retrieve&db=PubMed&dopt=Citation&list_uids=20)
- 1800 Zheng, Y., Wildonger, J., Ye, B., Zhang, Y., Kita, A., Younger, S. H., Zimmerman, S., Jan, L. Y., Jan, Y.  
1801 N. (2008). Dynein is required for polarized dendritic transport and uniform microtubule orientation in  
1802 axons. *Nat Cell Biol* 10, 1172-80 --  
1803 [http://www.ncbi.nlm.nih.gov/entrez/query.fcgi?cmd=Retrieve&db=PubMed&dopt=Citation&list\\_uids=18](http://www.ncbi.nlm.nih.gov/entrez/query.fcgi?cmd=Retrieve&db=PubMed&dopt=Citation&list_uids=18)  
1804 [758451](http://www.ncbi.nlm.nih.gov/entrez/query.fcgi?cmd=Retrieve&db=PubMed&dopt=Citation&list_uids=18)
- 1805 Ziebert, F., Mohrbach, H., Kulić, I. M. (2015). Why Microtubules Run in Circles: Mechanical Hysteresis of  
1806 the Tubulin Lattice. *Physical Review Letters* 114, 148101 --  
1807 <http://link.aps.org/doi/10.1103/PhysRevLett.114.148101>
- 1808 Züchner, S., Nouredine, M., Kennerson, M., Verhoeven, K., Claeys, K., De Jonghe, P., Merory, J.,  
1809 Oliveira, S. A., Speer, M. C., Stenger, J. E., Walizada, G., Zhu, D., Pericak-Vance, M. A., Nicholson,  
1810 G., Timmerman, V., Vance, J. M. (2005). Mutations in the pleckstrin homology domain of dynamin 2  
1811 cause dominant intermediate Charcot-Marie-Tooth disease. *Nat Genet* 37, 289-94 --  
1812 <http://www.ncbi.nlm.nih.gov/pubmed/15731758>
- 1813
- 1814

1815 **Figures**

1816

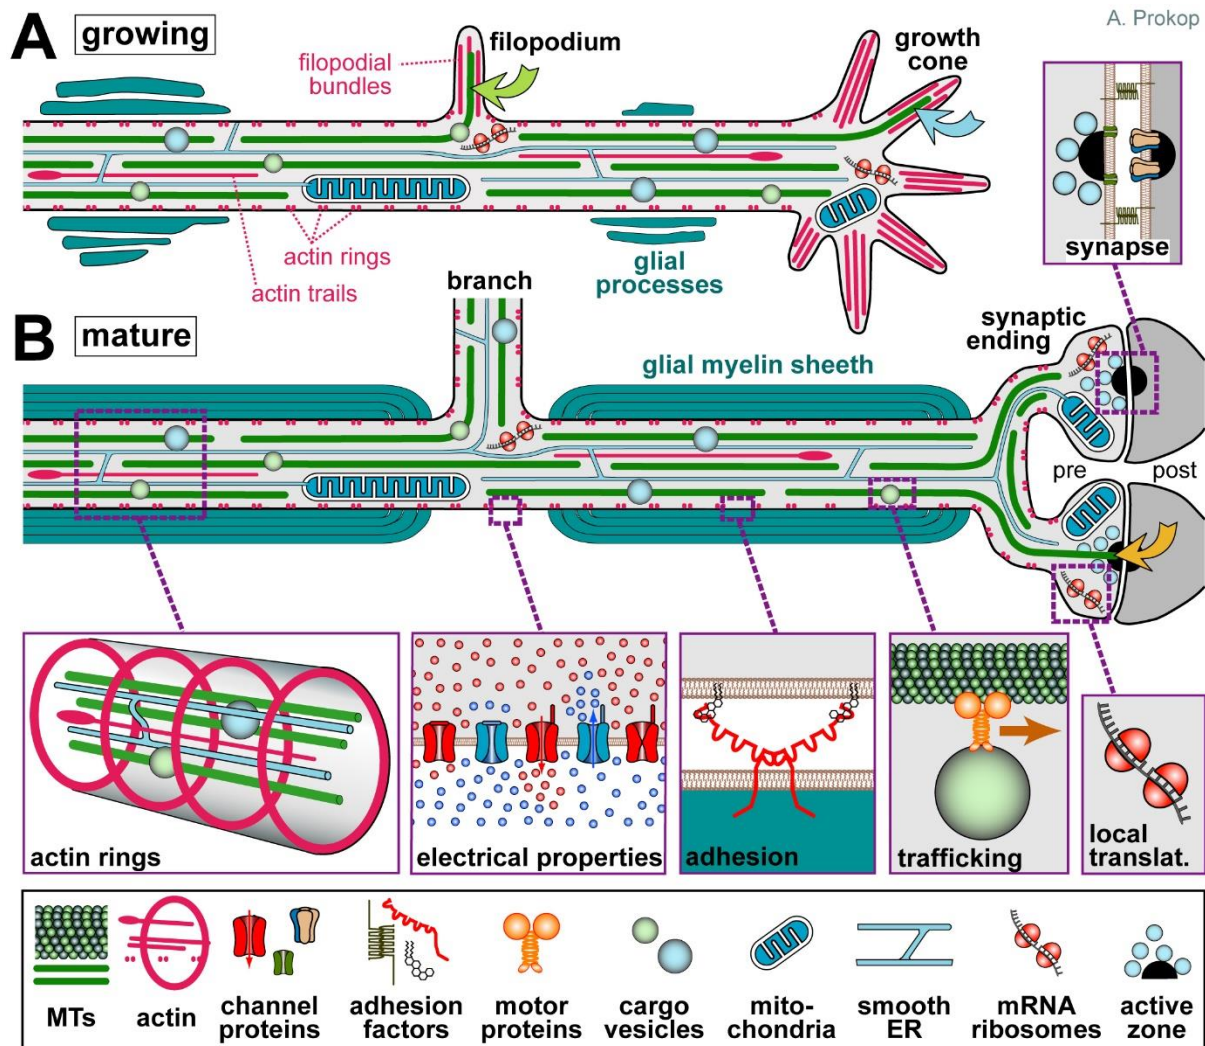

1817

1818 **Fig. 1** Specific properties of axons. Axons during the growth cone stage are shown in (A) and after  
 1819 synaptic maturation in (B), differing primarily in certain stage-specific specialisations including growth  
 1820 cones, synapses, electrical properties and glial interactions (here myelination; Meyer and Kaspar, 2017;  
 1821 Pan and Chan, 2017). The core machinery in the axon shaft can be expected to be similar at both stages:  
 1822 parallel continuous bundles of extended but discontinuous MTs run all along axons serving as a structural  
 1823 backbone (see Fig.2), a transport highway for axonal trafficking (driven by motor proteins), and a source  
 1824 for 'off-track' MTs contributing to morphogenetic processes including branch formation, directed axon  
 1825 growth and synapse formation/plasticity (green, orange, blue curved arrows); MT bundles are  
 1826 interspersed with longitudinal actin trails (Leterrier et al., 2017), continuous networks of (smooth) ER  
 1827 (Gonzalez and Couve, 2014), and other membranous organelles including mitochondria (Saxton and  
 1828 Hollenbeck, 2012); axonal membranes display regularly spaced periodic rings of cortical actin (Qu et al.,  
 1829 2017; Xu et al., 2013; Vassilopoulos et al., 2019), an unusually high number of ion-specific channel  
 1830 proteins and transporters to conduct nerve impulses (Kandel et al., 2012), as well as adhesions with  
 1831 external structures including parallel axons (not shown), glial processes (Pronker et al., 2016) and  
 1832 synaptic partner cells (Koper et al., 2012); a degree of independence from cell-body derived proteins is  
 1833 provided by local translation machinery (Cioni et al., 2018; Giuditta et al., 2002b; Shigeoka et al., 2018) or  
 1834 supply from surrounding glia cells (not shown; Court et al., 2011; Frühbeis et al., 2013; Giuditta et al.,  
 1835 2002a; Rajendran et al., 2014). Note that the axon diameter in the region between glia cells in B (referred  
 1836 to as Node of Ranvier) usually has a much smaller diameter than the rest of the axon (Hoffman, 1995).

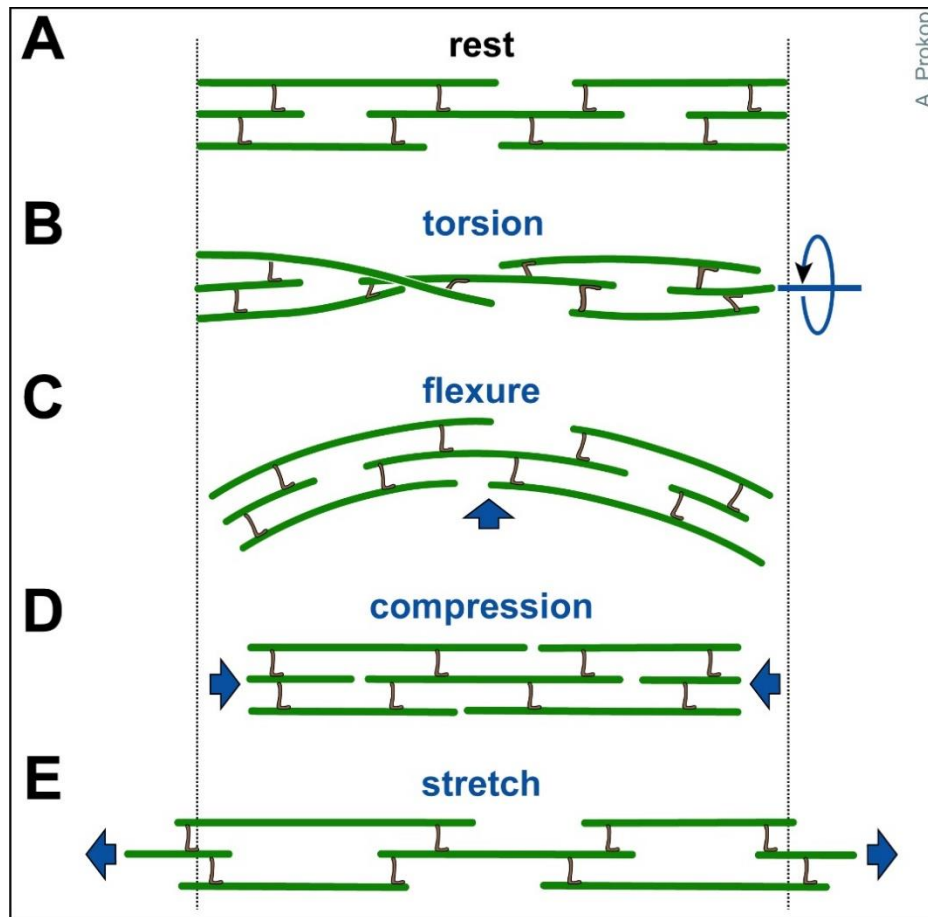

1837

1838

1839

1840

**Fig. 2** Axonal response to mechanical challenges. Continuous bundles of discontinuous MTs which are flexibly cross-linked (likely involving slip-bonds) are thought to provide a structural element that can respond to different forms of mechanical impact (as indicated in blue).



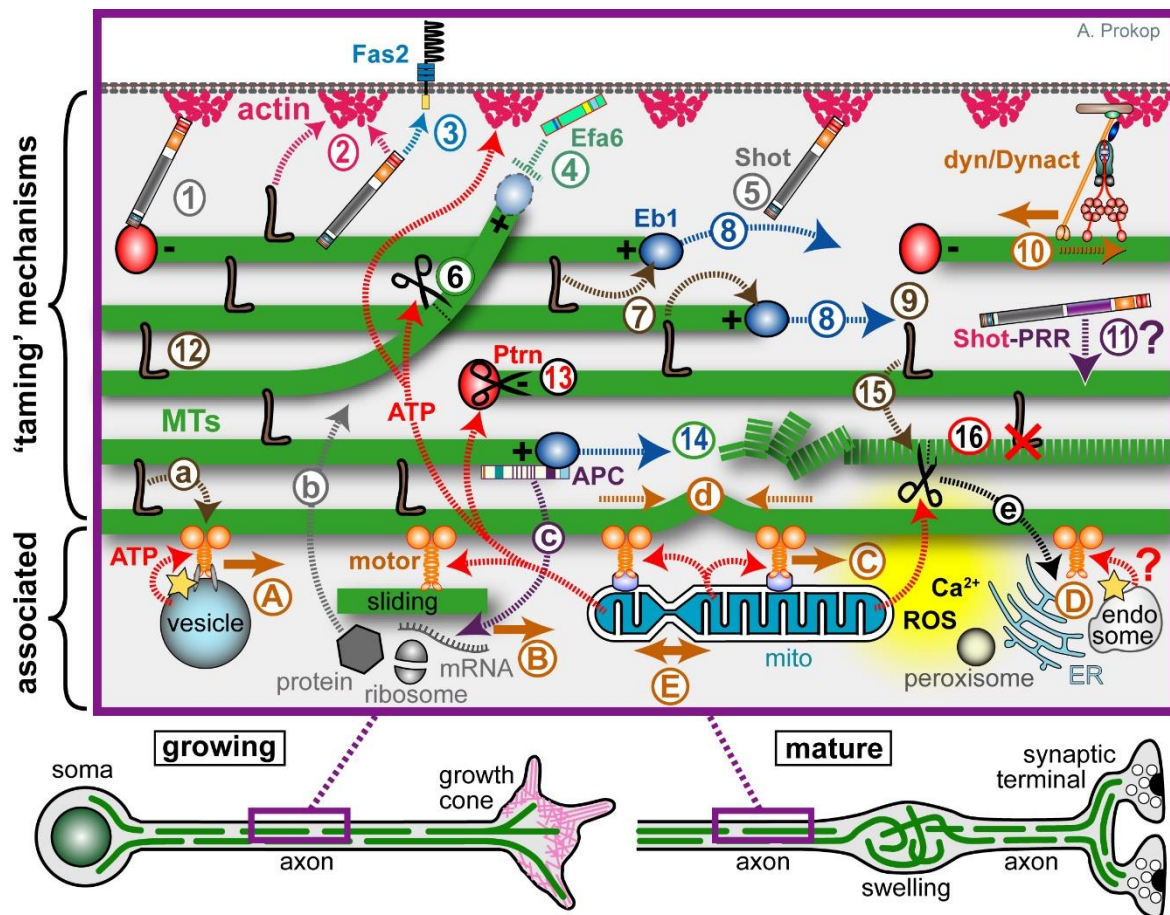

1841

1842

1843

1844

1845

1846

1847

1848

1849

1850

1851

1852

1853

1854

1855

1856

1857

1858

1859

1860

1861

1862

1863

1864

1865

1866

1867

1868

**Fig. 3** An interactome of MT-regulating and -associated mechanisms expected to contribute within the model of local axon homeostasis. Developing and mature neurons are shown at the bottom indicating that the close-up (magenta frame) might apply in both contexts. **1-16**) Potential mechanisms that can 'tame' MTs into bundled conformation: MT polymerisation (blue stippled arrows) is driven by molecular machinery centred on Eb1 (blue balls), further influenced by the tubulin-supply machinery (not shown) and shaft-binding proteins (**7**); polymerisation generates new MTs required for bundle formation (**8**) and turn-over (**14**); to integrate into bundles, extending MTs require guidance via actin-Eb1 cross-linkage along the axonal surface (**5**; Shot) or along pre-existing MTs through MT-MT cross-linkers (**9**; brown L). The same or other cross-linkers provide the structural glue that holds MT bundles together (**12**; brown L); some of them can also bind to actin (**2**), they protect from (or recruit) MT severing activity (**15**), and influence motor protein dynamics (**a**). MTs which have escaped any cross-linkage are eliminated by cortical collapse factors when approaching the axonal surface (**4**; Efa6) or by MT severing factors at MT-MT cross-points (**6**). The bundled MTs are discontinuous; their free minus ends are stabilised by CAMSAP/Patronin (Ptrn) together with katanin (black scissors; **13**), whereas non-polymerising MT plus ends are stabilised by other factors (not shown; e.g. CLASP or the Dynactin subunit p150/Glued; Hur et al., 2011; Lazarus et al., 2013). The dynein/Dynactin complex is believed to link cortical actin to MT bundles and drive them anterogradely (**10**), whereas Ptrn at minus ends may anchor MTs via spectraplakins to the axon cortex (**1**); spectraplakins may also link MTs directly to cortical actin (**2**) or to transmembrane receptors (**3**), and they are expected to perform further, still unexplored actin-independent bundle-promoting roles through their PRR domains (**11**). Tear-and-wear damages MTs (dashed green line), potentially affecting interaction with MT-binding proteins (**16**; red X); MT severing proteins might selectively eliminate such MTs (**16**; scissors) or MTs undergo repair (not shown). **A-E**) Mechanisms closely 'associated' with MT bundles: MT-associated motor proteins ('motor', solid orange arrows) drive axonal transport of (protein-loaded) vesicles (**A**), cytoplasmic factors including proteins, translational machinery (ribosomes) or RNAs (**B**), move other MTs (**B**, sliding), and position/rearrange organelles including mitochondria (**C**, mitos), ER, peroxisomes and endosome (**D**) - and this likely includes mitochondrial fission and fusion (**E**). **a-e**) The motor-associated functions all act downstream of

1869 MT bundles because they require them to walk on; but they also act upstream: for example, the forces  
1870 they generate (stippled orange arrows) are the potential cause for MT disorganisation (buckling shown in  
1871 **d**); transport delivers required regulators and building blocks for bundle-maintaining processes (**b**); the  
1872 proper regulation of organelles/endocytic compartments provides systemic factors that can orchestrate  
1873 taming mechanisms, including intracellular free calcium or reactive oxygen species (Ca<sup>2+</sup>, ROS; yellow  
1874 cloud) as well as ATP required for many processes including actin dynamics, MT severing and MT motor  
1875 activity (red stippled arrows; note that vesicular transport uses glycolysis to generate its own ATP; yellow  
1876 star); *vice versa*, the MT severer spastin also regulates the ER through ATP-independent mechanisms  
1877 (**e**), and MT-associated proteins (APC) regulate local translation events (**c**).

1878

1879

1880

1881

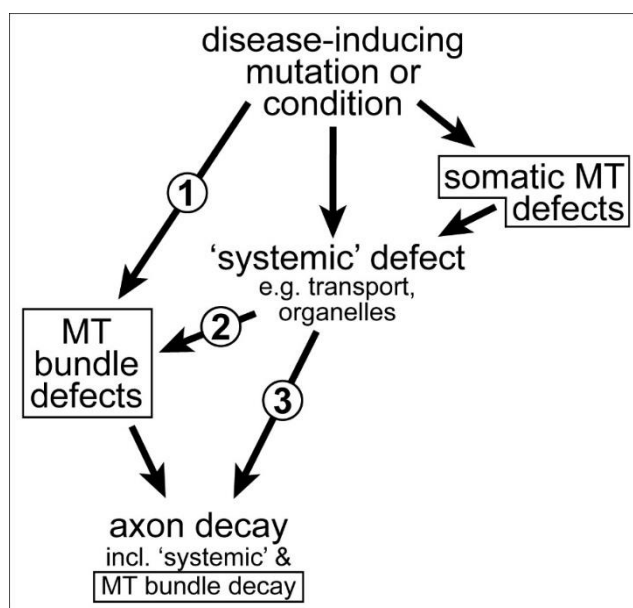

1882

1883 **Fig. 4** MT bundle defects as cause or consequence of axon decay. **1**) Disease-inducing  
1884 mutations/conditions can affect a MT-bundle regulator (e.g. dystonin; Voelzmann et al., 2017), thus  
1885 causing MT bundle defects first which can, in turn, trigger axon decay. **2**) Disease-inducing  
1886 mutations/conditions can affect systemic factors which, in turn cause MT bundle defects as an  
1887 intermediate causative step in the cascade leading to axon decay (e.g. axonal transport fails, leading to  
1888 MT bundle defects which then contribute to axon decay (e.g. Alzheimer's disease or ALS; Brandt and  
1889 Bakota, 2017; Farah et al., 2003; Zempel and Mandelkow, 2015); this may occur even if MT regulators  
1890 are affected, but these regulators mainly act in the cell body (e.g. dysregulation of the Golgi; Ferrier et al.,  
1891 2013). **3**) MT bundle deterioration may be a mere consequence of axon decay, although this case will be  
1892 difficult to disentangle from option 2, since MT bundle disintegration and axonal disassembly may occur in  
1893 parallel, as observed in developmental or injury-induced axon degeneration; Bradke et al., 2012; Wang et  
1894 al., 2012; Yaron and Schuldiner, 2016). All MT-related phenotypes in this graph are emphasised with a  
1895 frame.

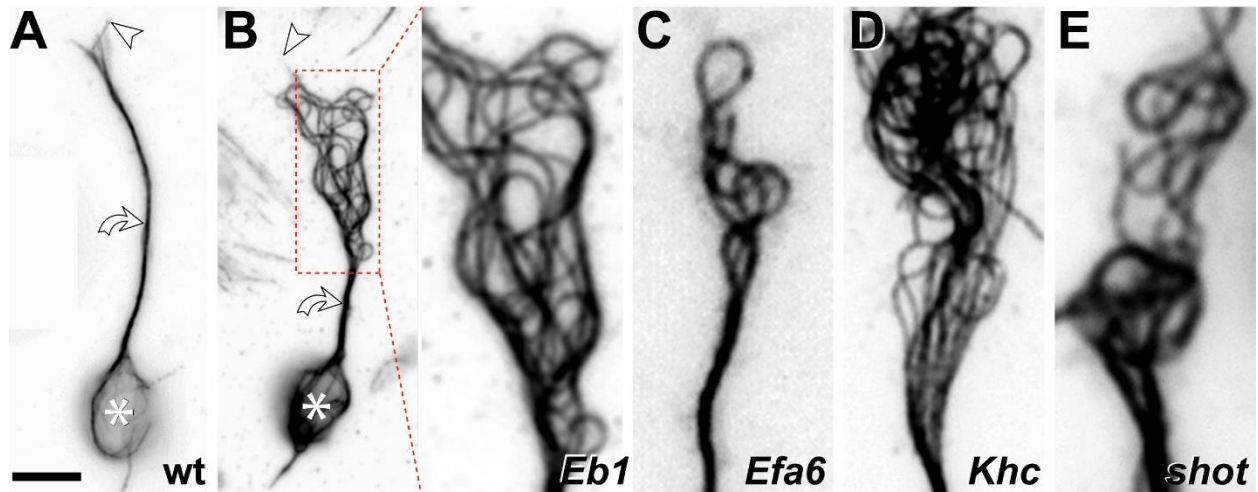

1896

1897

1898

1899

1900

1901

1902

1903

1904

1905

1906

1907

1908

1909

**Fig. 5** Disorganisation of axonal MTs upon loss of different MT regulators in *Drosophila* primary neurons. **A)** Normal neuron (wild-type, wt) with soma (asterisk), axon shaft (curved arrow) and growth cone (tip of most distal MT indicated by arrow head). **B)** *Eb1<sup>5</sup>* mutant neuron where the area of MT disorganisation is framed by a red stippled box and shown as close-up on the right. **C-E)** Similar close-ups shown for *Efa6<sup>Gx6[w-]</sup>*, *Khc<sup>27</sup>* and *shot<sup>3</sup>* mutant neurons. Note that the four mutated factors perform fundamentally different molecular functions, with Eb1 being a MT plus-end binder ('8' in Fig.3), Efa6 a cortical collapse factor ('4' in Fig.3), Khc a kinesin-1 motor protein ('A-E' in Fig.3) and Shot a multi-functional cross-linker ('1-3, 5, 11' in Fig.3). All neurons were derived from wild-type or homozygous mutant embryos, mechanically and chemically dissociated, kept for 7days in pre-culture in a centrifuge tube to deplete any maternal gene product, mechanically and chemically dissociated again, cultured on concanavalin A-coated glass coverslips for 1day at 21°C, fixed and stained with anti- $\alpha$ -tubulin (DM1A, Sigma; procedures detailed elsewhere: Prokop et al., 2012); images were taken using STED (stimulated emission depletion) microscopy. Scale bar in A represents 10  $\mu$ m for the two neurons and 4  $\mu$ m in close-ups.

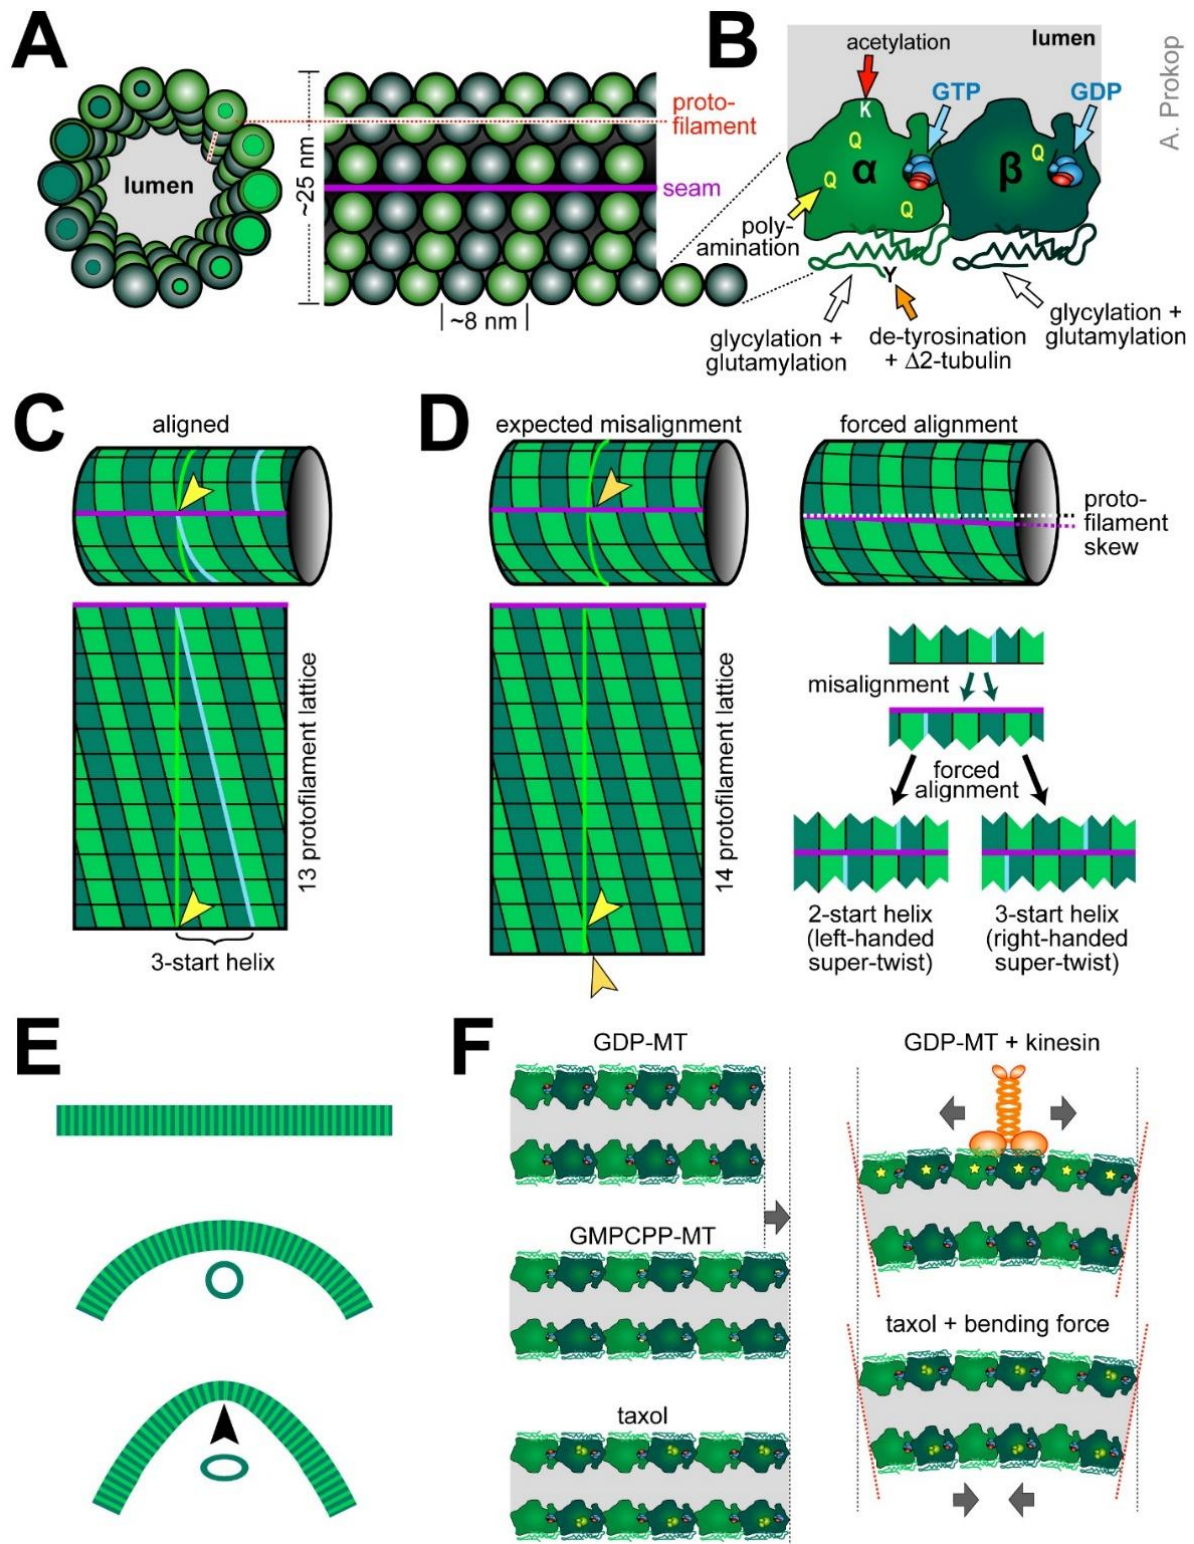

A. Prokop

1910

1911 **Fig. 6** A molecular perspective of microtubule properties. **A)** Cross-section of a MT with 14 protofilaments  
 1912 (PF) and lateral view of a 13 PF MT, both in B-lattice configuration, where  $\alpha$ -tubulins make lateral bonds  
 1913 with  $\alpha$ -tubulins and  $\beta$  with  $\beta$ , except at the seam (magenta line: seam; dashed red line: PF). **B)** Close-up  
 1914 of an  $\alpha/\beta$ -tubulin heterodimer showing the various post-translational modification sites as indicated; note  
 1915 that the GTP of  $\beta$ -tubulin in lattices is usually hydrolysed (GDP). **C)** A 13 PF MT (top), cut open at the  
 1916 seam and rolled out (bottom); the yellow line shows the diameter, the blue line follows the helical rise of  
 1917 laterally bonded tubulins; in 13 PF MTs, tubulins are precisely aligned at the seam (yellow arrow head)  
 1918 but shifted by three positions (3-start helix). **D)** When deviating from the 13 PF prototype, tubulins are  
 1919 misaligned at the seam (orange arrow head); when forced into alignment, the PFs skew, causing a super-

1920 twist of the MT as described by the 'lattice accommodation model' (Chrétien and Fuller, 2000; Langford,  
 1921 1980); for certain PF numbers, MTs can form two alternative alignments, of which usually the version with  
 1922 the lower helix start value (left) has a left-handed super-twist, the higher value is right-handed (Chrétien  
 1923 and Fuller, 2000). **E**) MTs behave like rigid rods with a persistence length of up to 10 μm, but can be bent  
 1924 down to diameters of ~1 μm before they break; it has been reported that their cross-sectional profile may  
 1925 flatten above a certain threshold (black arrow head), thus softening the tube. **F**) Lattices of GDP-tubulin  
 1926 are 1-3% shorter than MTs that were polymerised with the non-hydrolysable GTP analogue GMPCPP, or  
 1927 stabilised with taxol (orange structure binding α-tubulin 1:1, according to Nogales et al., 1995); binding of  
 1928 kinesin-1 causes similar lengthening of tubulin (and additional compactions in the tubulin structure: yellow  
 1929 stars) which may cause cooperative binding of further kinesins and induce curvature if occurring only on  
 1930 one side of the MT; in extended taxol-bound MTs, bending forces were suggested to transfer tubulins on  
 1931 the concave side into their short conformation as an energetically favoured condition. For further  
 1932 references see main text.

1933

1934

1935

1936

1937

| experimental conditions                                                                         | diameters of curvature [μm] <sup>a</sup> | comments                                                                                                                                                    | ref. |
|-------------------------------------------------------------------------------------------------|------------------------------------------|-------------------------------------------------------------------------------------------------------------------------------------------------------------|------|
| <b>kinesin-1 carpets</b>                                                                        |                                          |                                                                                                                                                             |      |
| standard tub, 10-20 μm taxol (after?) <sup>b</sup> polym.                                       | 1-1.4 <sup>c</sup>                       | waves and curls upon pinning                                                                                                                                | [1]  |
| standard tub, 50 μM taxol during & after polym.; high MT density (2.5 MTs/μm <sup>2</sup> )     | 1-5                                      | loops form through collision; loop duration up frequently >5 min; strong increase in loops at high MT conc.; decreasing loop radius with increasing contour | [2]  |
| rhodamine-tub, 10 μm taxol after polym.; exposing to air bubble or n-heptane                    | 1.1 (heptane), 1.8 (air)                 | MTs become reversibly unstable in non-polar conditions: 50% of MTs form loops as long as close to air bubble; effect absolutely requires kinesins           | [3]  |
| rhodamine-tub, 10 μM taxol after polym.                                                         | 2.5-3.75 <sup>c</sup>                    | left-handed supertwist favours CCW rotation of loops; CCW rotation is preserved in spools                                                                   | [4]  |
| biotin-tub, 10 μm taxol after polym.; SA-linked                                                 | 1-12.6, mean 3.9                         |                                                                                                                                                             |      |
| biotin-tub, 10 μm taxol after polym.; SA-linked                                                 | 1-5, mean 2.3                            | up to 25 μm long straight bundles; pinning of tip induces spools or fishtailing; rare "unspooling" events                                                   | [5]  |
| biotin-tub, 10 μm taxol after polym.; SA-linked; 1600, 870, 270 and 90 kinesins/μm <sup>2</sup> | ca. 2.4-4                                | highest spool density & lowest spool diameter @ highest kinesin density; pinning as main cause for spool formation                                          | [6]  |
| biotin-GTP-tub, 10 μm taxol after polym.; SA-linked                                             | 5.7 (@ 10.8 μm length), 3 (@ 3,7 μm)     | spool diameters increase with MT length per condition; spool diameters: GMP-MTs (taxol) < GMPCPP-MTs (no taxol) <                                           | [7]  |

|                                                                                                   |                                                                |                                                                                                                                                                                                                              |      |
|---------------------------------------------------------------------------------------------------|----------------------------------------------------------------|------------------------------------------------------------------------------------------------------------------------------------------------------------------------------------------------------------------------------|------|
| biotin-GMPCPP-tub, 10 $\mu\text{m}$ taxol after polym.; SA-linked                                 | 18.8 (@ 10.3 $\mu\text{m}$ length), 5.8 (@ 3.4 $\mu\text{m}$ ) | GMPCPP-MTs (taxol)                                                                                                                                                                                                           |      |
| biotin-GMPCPP-tub, no taxol; SA-linked                                                            | 8.2 (@ 10 $\mu\text{m}$ length), 4.3 (@ 3.4 $\mu\text{m}$ )    |                                                                                                                                                                                                                              |      |
| biotin-GTP-tub, 10 $\mu\text{m}$ taxol (after?) <sup>b</sup> polym.; SA-linked                    | 3.2 $\mu\text{m}$ (@ 6 $\mu\text{m}$ length)                   | live imaging: pinning & collisions (simultaneous sticking) cause spool formation; spool formation is not activated by a Brownian ratchet type process                                                                        | [8]  |
| biotin-tub, 10 $\mu\text{m}$ taxol after polym.; SA-linked; microfluidic device                   | 2.7 (pinning), 6.2 (collisions)                                | live imaging: pinning & collisions (simultaneous sticking) cause spools of different diameters; pinning more frequent in flow cells than microfluidic device                                                                 | [9]  |
| biotin-tub, (taxol?) <sup>b</sup> polym.; SA-quantum dot-linked                                   | 1.2, mean 3.4                                                  | left/right-handed super-twist: CCW/CW rotation; rings form intertwined wreath-like structures; tendency to disassemble involving MT breakage, kinesins pulling (blocked by AMP-PNP), counteracted by SA (enhanced by biotin) | [10] |
| biotin-tub, 10 $\mu\text{m}$ taxol after polym.; SA-quantum dot-linked; patterned kinesin carpets | 1-5.3 and 3.1                                                  | smallest spool diameters on constrained carpets: 1-5.3 $\mu\text{m}$ on 5 $\mu\text{m}$ stripes, 3.1 $\mu\text{m}$ on 2 $\mu\text{m}$ wide squares                                                                           | [11] |
| <b>axonemal dynein carpet</b>                                                                     |                                                                |                                                                                                                                                                                                                              |      |
| Cy3-tub, 10 $\mu\text{M}$ taxol                                                                   | straight                                                       | forming vortices in mm range                                                                                                                                                                                                 | [12] |

1938 **Tab. 1** MT loop or spool formation in gliding assays under different conditions. a) Primarily the lower  
 1939 range of mentioned diameters is listed; b) not clear from experimental section; c) measured from images.  
 1940 References [1] (Amos and Amos, 1991), [2] (Liu et al., 2011), [3] (Rashedul Kabir et al., 2012), [4]  
 1941 (Kawamura et al., 2008), [5] (Hess et al., 2005), [6] (Lam et al., 2014), [7] (Wada et al., 2015), [8] (Luria et  
 1942 al., 2011), [9] (VanDelinder et al., 2016b), [10] (Liu et al., 2008), [11] (Liu and Bachand, 2013), [12]  
 1943 (Sumino et al., 2012). Note that a number of mathematical models were put forward to describe loop or  
 1944 spool dynamics in gliding assays (Crenshaw et al., 2011; Gosselin et al., 2016; Luria et al., 2011; Pearce  
 1945 et al., 2018; Ziebert et al., 2015).
